# Supplementary material for: Electrophysiological Evaluation of an Anticancer Drug Gemcitabine on Cardiotoxicity Revealing Down-regulation and Modification of the Activation Gating Properties in the Human Rapid Delayed Rectifier Potassium Channel
Source: Research Square preprint supplement (doi:10.21203/rs.3.rs-1114008/v1), 2021-12-01
Supplement: Supplementary file 1 [file 8bd8c07ac51abdac763b34e1.xlsx]

## Sheet: Sheet1
-80	13.0915	1.09358	12.292	2.01531	6.40442	0.67263	13.2332	1.68698		-80	0.119339		-80	0.092273		-80	0.0651154		-80	0.0401928	-80	16.3092	3.0355	19.0767	6.18598	-80	0.156171	-80	0.0824528	0	1	0.0425372	200	0.624213	0.0487858	0.001	0.970361	0.8	-20.781	-19.844	-23.125	-26.563	-25.469	-26.563	-22.5	-26.875	-24.531	-30.313	-30.625
-70	10.9801	0.983139	2.25742	9.93902	6.47288	0.619582	11.3981	1.58352		-79.4531	0.12743		-79.4531	0.098754		-79.4531	0.0698741		-79.4531	0.043197	-70	16.1635	2.7634	18.567	6.33606	-79.4531	0.167196	-79.4531	0.0884978	0.0005	1	0				0.00105545	0.969265	0.805	-23.281	-21.875	-23.438	-22.969	-27.656	-26.719	-23.125	-29.063	-22.969	-26.563	-25.625
-60	10.4542	0.592412	17.8539	7.74129	7.29923	0.509277	11.458	1.09112		-78.9062	0.13607		-78.9062	0.10569		-78.9062	0.0749806		-78.9062	0.0464257	-60	13.2215	2.05801	17.555	5.41074	-78.9062	0.178999	-78.9062	0.094986	0.01	0.926583	0.0754487				0.00111397	0.968147	0.81	-20.625	-22.344	-21.25	-24.844	-20.313	-25.625	-27.344	-27.031	-19.375	-28.281	-30.625
-50	11.0139	0.662786	20.2781	7.78131	8.28143	0.529341	10.6553	1.10502		-78.3594	0.145295		-78.3594	0.113114		-78.3594	0.0804603		-78.3594	0.0498957	-50	16.9388	3.87261	18.61	5.81284	-78.3594	0.191635	-78.3594	0.10195	0.05	0.852131	0.0665596				0.00117574	0.967008	0.815	-19.219	-25.938	-23.594	-25	-28.438	-24.531	-26.875	-23.438	-23.75	-27.344	-27.031
-40	13.814	0.79024	20.0482	6.3548	9.7149	0.734761	14.4008	1.60106		-77.8125	0.155146		-77.8125	0.121058		-77.8125	0.0863403		-77.8125	0.0536251	-40	19.6688	2.47085	22.9891	6.03046	-77.8125	0.205164	-77.8125	0.109424	0.1	0.70391	0.0759803				0.00124094	0.965846	0.82	-21.563	-23.906	-17.969	-25.938	-24.375	-23.906	-28.438	-23.906	-22.188	-29.531	-28.281
-30	35.2921	3.26031	42.8418	8.04974	24.8988	3.61788	34.9642	4.59417		-77.2656	0.165665		-77.2656	0.129561		-77.2656	0.0926501		-77.2656	0.0576331	-30	62.0485	6.65186	53.4885	8.74914	-77.2656	0.219647	-77.2656	0.117446	5	0.649268	0.104894				0.00130975	0.964662	0.825	-22.969	-23.438	-20	-25	-21.094	-25.469	-22.656	-23.906	-25	-26.094	-27.656
-20	134.205	15.1256	134.676	27.8293	94.7277	13.6508	136.262	21.0257		-76.7188	0.176897		-76.7188	0.138661		-76.7188	0.0994209		-76.7188	0.0619408	-20	236.445	22.3916	165.675	15.1355	-76.7188	0.235152	-76.7188	0.126057	50	0.487915	0.010832				0.00138237	0.963455	0.83	-22.344	-20.313	-21.094	-25	-27.5	-25	-25	-32.5	-18.906	-26.25	-30.625
-10	413.822	40.2662	365.972	47.3315	278.697	33.0726	407.662	48.3432		-76.1719	0.18889		-76.1719	0.1484		-76.1719	0.106687		-76.1719	0.0665703	-10	635.71	42.5152	424.19	32.1159	-76.1719	0.251751	-76.1719	0.135298	1	0.652003	0.0660195				0.00145902	0.962225	0.835	-20.469	-21.25	-22.344	-23.906	-27.969	-26.406	-22.031	-24.375	-21.875	-28.125	-29.688
0	871.734	64.1087	703.728	83.7948	532.497	44.9569	822.515	60.8975		-75.625	0.201696		-75.625	0.158823		-75.625	0.114483		-75.625	0.0715459	0	1142.73	54.7759	757.442	60.0247	-75.625	0.269523	-75.625	0.145217							0.00153993	0.960971	0.84	-22.813	-19.844	-23.594	-24.531	-25.938	-26.25	-24.219	-28.281	-25.469	-30.781	-29.375
10	1313.44	73.9455	973.532	139.815	731.232	35.8951	1182.81	71.193		-75.0781	0.215371		-75.0781	0.169978		-75.0781	0.122849		-75.0781	0.0768933	10	1508.43	67.8348	977.335	86.9433	-75.0781	0.288548	-75.0781	0.155863							0.00162531	0.959693	0.845	-20	-20	-26.25	-25.938	-21.094	-28.281	-25.156	-25.625	-23.281	-29.844	-32.031
20	1575.8	72.0076	1081.93	165.643	800.295	28.453	1378.7	102.15		-74.5312	0.229972		-74.5312	0.181916		-74.5312	0.131827		-74.5312	0.0826404	20	1689.27	83.8162	1045.77	89.8225	-74.5312	0.308917	-74.5312	0.167289							0.00171544	0.958392	0.85	-23.438	-21.094	-24.688	-26.875	-22.5	-26.25	-28.594	-25.625	-25.469	-28.594	-23.438
30	1679.41	69.3713	1099.32	171.188	819.495	24.0284	1440.7	110.305		-73.9844	0.245563		-73.9844	0.194693		-73.9844	0.14146		-73.9844	0.0888169	30	1737.15	90.6486	1069.93	85.8466	-73.9844	0.330722	-73.9844	0.179553							0.00181056	0.957066	0.855	-22.656	-22.5	-22.5	-25.781	-22.813	-25	-24.531	-29.063	-27.813	-25.313	-26.875
40	1701.17	69.772	1109.27	174.978	826.762	22.8927	1442.15	110.837		-73.4375	0.262211		-73.4375	0.208366		-73.4375	0.151798		-73.4375	0.095455	40	1742.73	89.1312	1070.79	86.5841	-73.4375	0.354067	-73.4375	0.192715							0.00191095	0.955715	0.86	-24.063	-22.5	-21.25	-25.156	-22.031	-28.125	-23.594	-27.969	-27.031	-25	-29.844
50	1705.05	71.3117	1112.9	176.903	831.657	18.9375	1448.7	110.6		-72.8906	0.279988		-72.8906	0.223		-72.8906	0.16289		-72.8906	0.102589	50	1737.42	93.9063	1076.4	81.3389	-72.8906	0.379059	-72.8906	0.206843							0.00201691	0.954339	0.865	-22.031	-18.594	-22.969	-24.375	-24.844	-22.5	-28.75	-28.906	-24.688	-25.938	-25.938
60	1709.16	72.7032	1109.71	179.281	833.927	18.5136	1456.43	113.761		-72.3438	0.298969		-72.3438	0.238662		-72.3438	0.174794		-72.3438	0.110256	60	1728.1	96.0424	1078.7	84.3067	-72.3438	0.405815	-72.3438	0.222006							0.00212875	0.952938	0.87	-20.625	-23.594	-23.438	-27.344	-23.75	-27.656	-27.813	-27.188	-23.906	-28.906	-27.188
										-71.7969	0.319237		-71.7969	0.255423		-71.7969	0.187566		-71.7969	0.118497						-71.7969	0.434459	-71.7969	0.23828							0.00224679	0.951512	0.875	-20.625	-17.344	-18.125	-24.531	-19.531	-27.344	-25.625	-26.25	-27.5	-29.844	-27.188
										-71.25	0.340879		-71.25	0.273362		-71.25	0.201272		-71.25	0.127353						-71.25	0.465124	-71.25	0.255746							0.00237137	0.95006	0.88	-21.25	-21.25	-19.375	-26.719	-21.875	-23.594	-26.875	-26.406	-22.969	-30.469	-30.313
										-70.7031	0.363987		-70.7031	0.29256		-70.7031	0.21598		-70.7031	0.136871						-70.7031	0.497953	-70.7031	0.274493							0.00250287	0.948581	0.885	-22.656	-19.219	-19.844	-24.531	-22.969	-24.844	-24.219	-22.5	-25	-27.188	-29.219
										-70.1562	0.388662		-70.1562	0.313105		-70.1562	0.231762		-70.1562	0.1471						-70.1562	0.533099	-70.1562	0.294614							0.00264165	0.947077	0.89	-23.594	-24.375	-24.063	-25	-21.563	-22.031	-23.594	-28.125	-27.656	-23.906	-30.156
										-69.6094	0.415009		-69.6094	0.335094		-69.6094	0.248697		-69.6094	0.158093						-69.6094	0.570724	-69.6094	0.316209							0.00278813	0.945546	0.895	-21.25	-25.156	-23.906	-22.5	-22.5	-25.469	-24.688	-27.656	-25.781	-29.375	-31.25
										-69.0625	0.443142		-69.0625	0.358626		-69.0625	0.266868		-69.0625	0.169907						-69.0625	0.611004	-69.0625	0.339386							0.00294273	0.943988	0.9	-23.281	-20	-22.5	-25.781	-24.688	-23.438	-25.938	-28.281	-21.094	-32.5	-26.875
										-68.5156	0.473181		-68.5156	0.38381		-68.5156	0.286368		-68.5156	0.182605						-68.5156	0.654125	-68.5156	0.364262							0.0031059	0.942403	0.905	-25.781	-21.094	-22.969	-22.188	-27.5	-22.188	-24.531	-24.531	-20.625	-29.688	-25.469
										-67.9688	0.505256		-67.9688	0.410762		-67.9688	0.307292		-67.9688	0.196251						-67.9688	0.700289	-67.9688	0.39096							0.00327812	0.94079	0.91	-23.594	-22.656	-20	-22.813	-21.875	-25.781	-25.625	-27.188	-23.125	-26.875	-27.656
										-67.4219	0.539504		-67.4219	0.439607		-67.4219	0.329744		-67.4219	0.210917						-67.4219	0.749709	-67.4219	0.419615							0.00345989	0.93915	0.915	-20.625	-22.344	-20.938	-22.188	-22.188	-20.625	-26.563	-24.688	-19.688	-24.375	-26.719
										-66.875	0.576073		-66.875	0.470476		-66.875	0.353836		-66.875	0.226678						-66.875	0.802615	-66.875	0.450369							0.00365174	0.937482	0.92	-25.156	-21.875	-21.25	-21.406	-26.875	-27.813	-30.781	-25	-22.188	-27.813	-30.625
										-66.3281	0.61512		-66.3281	0.503512		-66.3281	0.379688		-66.3281	0.243617						-66.3281	0.859253	-66.3281	0.483375							0.00385423	0.935787	0.925	-22.5	-23.125	-18.125	-24.219	-25	-29.375	-24.063	-23.438	-27.813	-24.063	-28.438
										-65.7812	0.656812		-65.7812	0.538867		-65.7812	0.407427		-65.7812	0.261821						-65.7812	0.919886	-65.7812	0.5188							0.00406794	0.934063	0.93	-24.688	-19.688	-20.781	-21.406	-23.75	-25.469	-29.688	-24.844	-24.219	-23.438	-29.688
										-65.2344	0.701329		-65.2344	0.576704		-65.2344	0.437193		-65.2344	0.281385						-65.2344	0.984794	-65.2344	0.556819							0.00429351	0.93231	0.935	-22.969	-23.125	-21.719	-24.688	-25.625	-24.219	-31.094	-26.406	-24.375	-31.25	-27.5
										-64.6875	0.748863		-64.6875	0.617196		-64.6875	0.469132		-64.6875	0.30241						-64.6875	1.05428	-64.6875	0.597623							0.00453158	0.930529	0.94	-22.031	-22.813	-20.781	-24.688	-22.5	-27.344	-28.125	-24.844	-27.813	-26.719	-27.656
										-64.1406	0.799616		-64.1406	0.66053		-64.1406	0.503404		-64.1406	0.325006						-64.1406	1.12867	-64.1406	0.641415							0.00478286	0.92872	0.945	-20.938	-23.594	-23.75	-24.063	-23.281	-29.844	-29.219	-20.781	-25	-28.281	-28.906
										-63.5938	0.853807		-63.5938	0.706905		-63.5938	0.540178		-63.5938	0.349289						-63.5938	1.2083	-63.5938	0.688414							0.00504807	0.926881	0.95	-19.375	-19.844	-23.281	-24.063	-25	-26.719	-28.906	-27.031	-23.125	-30	-29.219
										-63.0469	0.911669		-63.0469	0.756534		-63.0469	0.579637		-63.0469	0.375386						-63.0469	1.29354	-63.0469	0.738855							0.00532798	0.925013	0.955	-25.156	-18.75	-22.5	-27.969	-25.469	-23.281	-24.531	-25.938	-24.375	-26.25	-23.906
										-62.5	0.97345		-62.5	0.809646		-62.5	0.621977		-62.5	0.403431						-62.5	1.38479	-62.5	0.792989							0.00562341	0.923117	0.96	-21.25	-21.875	-21.406	-25	-27.5	-23.906	-26.406	-27.5	-24.531	-26.875	-25.313
										-61.9531	1.03942		-61.9531	0.866484		-61.9531	0.667408		-61.9531	0.433571						-61.9531	1.48248	-61.9531	0.851086							0.00593523	0.921191	0.965	-23.438	-22.656	-23.125	-26.406	-20.625	-23.906	-28.594	-22.5	-24.375	-27.031	-30.625
										-61.4062	1.10985		-61.4062	0.927309		-61.4062	0.716155		-61.4062	0.465962						-61.4062	1.58705	-61.4062	0.913435							0.00626434	0.919235	0.97	-25.938	-20.938	-24.844	-24.375	-25	-26.406	-25.313	-24.219	-25.781	-24.375	-23.438
										-60.8594	1.18505		-60.8594	0.992402		-60.8594	0.76846		-60.8594	0.50077						-60.8594	1.69899	-60.8594	0.980348							0.00661169	0.91725	0.975	-23.75	-22.5	-17.656	-23.75	-24.063	-24.844	-24.688	-25.469	-25.938	-30	-27.344
										-60.3125	1.26534		-60.3125	1.06206		-60.3125	0.824582		-60.3125	0.538178						-60.3125	1.81881	-60.3125	1.05216							0.00697831	0.915235	0.98	-24.844	-23.906	-18.594	-22.656	-26.719	-21.875	-26.25	-25.469	-24.688	-28.281	-34.219
										-59.7656	1.35107		-59.7656	1.1366		-59.7656	0.8848		-59.7656	0.578377						-59.7656	1.94708	-59.7656	1.12922							0.00736525	0.913191	0.985	-24.063	-21.719	-20.625	-20.625	-25.625	-27.031	-25	-25	-24.688	-28.594	-27.031
										-59.2188	1.44261		-59.2188	1.21638		-59.2188	0.949412		-59.2188	0.621577						-59.2188	2.08438	-59.2188	1.21193							0.00777365	0.911117	0.99	-22.656	-20.781	-21.719	-20.781	-24.375	-24.844	-24.375	-26.719	-20.781	-28.281	-27.031
										-58.6719	1.54033		-58.6719	1.30174		-58.6719	1.01874		-58.6719	0.668002						-58.6719	2.23135	-58.6719	1.30068							0.0082047	0.909013	0.995	-19.844	-24.844	-20.781	-20.313	-21.563	-25.469	-28.438	-19.844	-22.5	-27.188	-24.531
										-58.125	1.64468		-58.125	1.39309		-58.125	1.09312		-58.125	0.71789						-58.125	2.38868	-58.125	1.39592							0.00865964	0.90688	1	-21.25	-22.5	-22.5	-24.844	-26.094	-23.906	-28.906	-24.219	-22.188	-28.125	-27.5
										-57.5781	1.75608		-57.5781	1.49085		-57.5781	1.17293		-57.5781	0.771501						-57.5781	2.55707	-57.5781	1.49813							0.00913982	0.904717	1.005	-21.25	-10.625	-0.4688	7.8125	19.219	24.844	44.531	92.5	167.81	240.31	322.81
										-57.0312	1.87502		-57.0312	1.59545		-57.0312	1.25856		-57.0312	0.829112						-57.0312	2.73732	-57.0312	1.60781							0.00964662	0.902524	1.01	-22.031	-15.469	-6.7188	-4.2188	5.7813	11.563	45.625	119.06	173.13	239.84	307.19
										-56.4844	2.00201		-56.4844	1.70739		-56.4844	1.35043		-56.4844	0.89102						-56.4844	2.93026	-56.4844	1.72551							0.0101815	0.900301	1.015	-22.656	-13.75	-10	-3.2813	-2.9688	7.8125	52.188	130.63	184.84	240	325.47
										-55.9375	2.13759		-55.9375	1.82717		-55.9375	1.449		-55.9375	0.957545						-55.9375	3.13676	-55.9375	1.85181							0.0107461	0.898048	1.02	-21.875	-19.844	-10	-6.0938	-1.4063	7.0313	61.719	138.28	189.38	254.84	331.09
										-55.3906	2.28234		-55.3906	1.95535		-55.3906	1.55475		-55.3906	1.02903						-55.3906	3.3578	-55.3906	1.98733							0.0113419	0.895766	1.025	-25.625	-15.625	-9.6875	-5	0	7.6563	71.563	142.03	178.13	270.31	359.84
										-54.8438	2.43687		-54.8438	2.0925		-54.8438	1.66821		-54.8438	1.10585						-54.8438	3.59437	-54.8438	2.13276							0.0119709	0.893455	1.03	-20.781	-16.563	-11.563	-6.5625	-2.9688	6.875	68.438	139.53	195.31	280.78	358.59
										-54.2969	2.60185		-54.2969	2.23925		-54.2969	1.78994		-54.2969	1.18839						-54.2969	3.84758	-54.2969	2.2888							0.0126346	0.891114	1.035	-21.25	-16.875	-10.313	-5.7813	-0.9375	6.0938	73.594	137.5	194.84	288.28	373.91
										-53.75	2.77799		-53.75	2.39629		-53.75	1.92054		-53.75	1.27708						-53.75	4.11859	-53.75	2.45624							0.0133352	0.888744	1.04	-23.281	-19.531	-12.031	-6.0938	-6.875	6.5625	71.719	136.09	194.84	302.81	389.38
										-53.2031	2.96602		-53.2031	2.56431		-53.2031	2.06064		-53.2031	1.37238						-53.2031	4.40863	-53.2031	2.63589							0.0140746	0.886345	1.045	-24.375	-19.531	-10.469	-3.5938	-2.8125	5	67.969	146.88	206.88	320	391.72
										-52.6562	3.16676		-52.6562	2.7441		-52.6562	2.21095		-52.6562	1.47478						-52.6562	4.71904	-52.6562	2.82865							0.0148551	0.883917	1.05	-23.125	-17.344	-13.906	-8.5938	-1.25	5.625	74.063	148.13	210.47	311.72	392.03
										-52.1094	3.38106		-52.1094	2.93646		-52.1094	2.37219		-52.1094	1.58481						-52.1094	5.05125	-52.1094	3.03547							0.0156788	0.88146	1.055	-21.719	-16.875	-12.813	-10	-4.6875	6.25	68.75	150.47	212.34	312.5	407.66
										-51.5625	3.60984		-51.5625	3.14228		-51.5625	2.54517		-51.5625	1.70303						-51.5625	5.40677	-51.5625	3.25736							0.0165482	0.878975	1.06	-25.625	-17.813	-11.875	-8.9063	-6.875	2.1875	81.719	150.63	218.59	327.97	421.09
										-51.0156	3.85405		-51.0156	3.3625		-51.0156	2.73073		-51.0156	1.83005						-51.0156	5.78723	-51.0156	3.49542							0.0174658	0.876462	1.065	-23.594	-18.75	-11.25	-11.094	-4.2188	1.7188	79.375	152.03	219.53	329.38	430.63
										-50.4688	4.11475		-50.4688	3.5981		-50.4688	2.92979		-50.4688	1.96651						-50.4688	6.19436	-50.4688	3.75081							0.0184342	0.87392	1.07	-18.906	-20.313	-10	-8.75	-4.5313	5.7813	77.813	157.5	219.84	334.84	440.63
										-49.9219	4.39304		-49.9219	3.85018		-49.9219	3.14331		-49.9219	2.11313						-49.9219	6.63003	-49.9219	4.0248							0.0194564	0.871351	1.075	-21.094	-16.25	-7.6563	-11.875	-2.9688	5.9375	81.875	154.06	224.06	355.94	445.47
										-49.375	4.69009		-49.375	4.11986		-49.375	3.37235		-49.375	2.27065						-49.375	7.09622	-49.375	4.31872							0.0205353	0.868754	1.08	-25.781	-18.906	-13.125	-10.625	-8.125	0.9375	84.375	158.59	230.63	350.47	455.16
										-48.8281	5.00718		-48.8281	4.40838		-48.8281	3.61802		-48.8281	2.43988						-48.8281	7.59504	-48.8281	4.63401							0.0216739	0.86613	1.085	-23.906	-19.688	-11.719	-6.7188	-6.0938	1.25	86.406	153.44	228.91	364.53	463.75
										-48.2812	5.34563		-48.2812	4.71703		-48.2812	3.88153		-48.2812	2.62168						-48.2812	8.12876	-48.2812	4.97222							0.0228757	0.86348	1.09	-23.281	-17.188	-10.469	-11.719	-4.8438	2.9688	83.438	151.25	232.03	372.03	461.56
										-47.7344	5.70689		-47.7344	5.04722		-47.7344	4.16416		-47.7344	2.81698						-47.7344	8.6998	-47.7344	5.33498							0.0241442	0.860803	1.095	-21.563	-21.094	-10	-12.5	-7.3438	5.1563	79.844	156.09	235.47	380.31	478.59
										-47.1875	6.09247		-47.1875	5.40044		-47.1875	4.46728		-47.1875	3.02678						-47.1875	9.31074	-47.1875	5.72407							0.025483	0.858101	1.1	-18.906	-20.938	-11.25	-8.9063	-4.375	8.9063	84.219	154.69	243.59	369.06	483.59
										-46.6406	6.50401		-46.6406	5.77827		-46.6406	4.79238		-46.6406	3.25214						-46.6406	9.96434	-46.6406	6.14138							0.026896	0.855372	1.105	-21.563	-17.656	-13.281	-10.625	-7.3438	3.75	86.563	158.13	250.94	377.34	506.88
										-46.0938	6.94323		-46.0938	6.18243		-46.0938	5.14102		-46.0938	3.49421						-46.0938	10.6635	-46.0938	6.58892							0.0283874	0.852619	1.11	-18.125	-19.531	-12.5	-12.031	-7.5	3.4375	81.719	145	253.13	381.72	507.5
										-45.5469	7.41198		-45.5469	6.61473		-45.5469	5.5149		-45.5469	3.75422						-45.5469	11.4115	-45.5469	7.06886							0.0299614	0.849841	1.115	-21.25	-17.813	-10.781	-10.313	-6.25	8.9063	84.844	157.66	247.66	402.34	508.91
										-45	7.91223		-45	7.07711		-45	5.91583		-45	4.03348						-45	12.2115	-45	7.58351							0.0316228	0.847039	1.12	-19.219	-18.906	-13.438	-10	-6.4063	7.5	80.938	158.75	252.97	382.03	515.63
										-44.4531	8.44608		-44.4531	7.57165		-44.4531	6.34573		-44.4531	4.3334						-44.4531	13.0672	-44.4531	8.13534							0.0333762	0.844213	1.125	-20.313	-16.25	-13.906	-8.5938	-1.4063	5.9375	85.469	165.63	248.59	392.03	521.09
										-43.9062	9.01576		-43.9062	8.10054		-43.9062	6.80669		-43.9062	4.6555						-43.9062	13.9824	-43.9062	8.72701							0.0352269	0.841364	1.13	-19.531	-16.25	-11.563	-10.469	-4.8438	9.8438	88.75	168.59	270.16	411.72	536.25
										-43.3594	9.62364		-43.3594	8.66616		-43.3594	7.30091		-43.3594	5.00139						-43.3594	14.9611	-43.3594	9.36133							0.0371803	0.838493	1.135	-23.125	-16.875	-11.406	-10	-3.4375	3.125	81.875	168.75	256.72	412.81	538.13
										-42.8125	10.2723		-42.8125	9.27103		-42.8125	7.83076		-42.8125	5.37282						-42.8125	16.0077	-42.8125	10.0413							0.0392419	0.8356	1.14	-22.188	-19.375	-11.25	-10.469	-5	7.5	82.344	169.22	266.41	419.84	547.5
										-42.2656	10.9643		-42.2656	9.91782		-42.2656	8.39877		-42.2656	5.77164						-42.2656	17.1267	-42.2656	10.7702							0.0414178	0.832685	1.145	-20.938	-17.344	-11.719	-8.4375	-9.2188	5	84.531	164.69	276.09	429.84	556.88
										-41.7188	11.7027		-41.7188	10.6094		-41.7188	9.00765		-41.7188	6.19984						-41.7188	18.3232	-41.7188	11.5514							0.0437144	0.82975	1.15	-22.031	-17.188	-10.938	-10.156	-6.5625	5	83.594	177.97	269.53	423.91	561.72
										-41.1719	12.4904		-41.1719	11.3488		-41.1719	9.66029		-41.1719	6.65955						-41.1719	19.6023	-41.1719	12.3887							0.0461384	0.826794	1.155	-20.938	-19.844	-13.906	-12.5	-10	7.9688	88.438	175.78	281.56	440.47	559.22
										-40.625	13.3307		-40.625	12.1394		-40.625	10.3598		-40.625	7.15306						-40.625	20.9696	-40.625	13.2858							0.0486968	0.82382	1.16	-23.906	-14.375	-12.813	-10.938	-6.0938	7.6563	78.906	179.84	273.44	452.34	575.78
										-40.0781	14.2271		-40.0781	12.9845		-40.0781	11.1094		-40.0781	7.68279						-40.0781	22.4311	-40.0781	14.2471							0.051397	0.820826	1.165	-21.563	-16.25	-15.625	-8.4375	-8.2813	3.2813	88.594	181.72	291.56	446.25	561.56
										-39.5312	15.1833		-39.5312	13.8878		-39.5312	11.9127		-39.5312	8.25137						-39.5312	23.993	-39.5312	15.2769							0.0542469	0.817814	1.17	-22.969	-21.25	-13.438	-7.8125	-3.75	6.4063	85.469	170.47	288.59	449.53	575.78
										-38.9844	16.203		-38.9844	14.8534		-38.9844	12.7733		-38.9844	8.86156						-38.9844	25.662	-38.9844	16.38							0.0572549	0.814786	1.175	-20.625	-17.969	-14.375	-9.5313	-5.625	4.2188	89.531	171.09	296.88	457.66	558.75
										-38.4375	17.2906		-38.4375	15.8854		-38.4375	13.6954		-38.4375	9.51637						-38.4375	27.4453	-38.4375	17.5615							0.0604296	0.81174	1.18	-23.125	-16.563	-13.75	-8.5938	-7.6563	7.8125	82.969	174.69	304.69	457.97	582.5
										-37.8906	18.4504		-37.8906	16.9882		-37.8906	14.6832		-37.8906	10.219						-37.8906	29.3504	-37.8906	18.8266							0.0637804	0.808679	1.185	-21.25	-16.406	-14.219	-8.125	-7.3438	2.0313	82.031	185.47	297.5	467.19	582.66
										-37.3438	19.687		-37.3438	18.1666		-37.3438	15.7412		-37.3438	10.9727						-37.3438	31.3853	-37.3438	20.1812							0.067317	0.805603	1.19	-20.938	-15.156	-11.875	-6.875	-7.9688	3.5938	81.094	180.63	291.56	469.84	591.72
										-36.7969	21.0056		-36.7969	19.4257		-36.7969	16.8743		-36.7969	11.7813						-36.7969	33.5585	-36.7969	21.6312							0.0710497	0.802512	1.195	-24.844	-18.906	-14.531	-10	-5	6.0938	90.313	189.53	297.03	472.5	601.56
										-36.25	22.4112		-36.25	20.7707		-36.25	18.0876		-36.25	12.6485						-36.25	35.879	-36.25	23.1831							0.0749894	0.799408	1.2	-22.813	-18.594	-15.625	-10.938	-6.5625	3.9063	88.438	186.41	298.28	475.47	594.69
										-35.7031	23.9096		-35.7031	22.2075		-35.7031	19.3865		-35.7031	13.5785						-35.7031	38.3565	-35.7031	24.8438							0.0791476	0.796292	1.205	-26.094	-22.656	-15.313	-10.625	-5.1563	5.3125	92.5	188.91	293.75	467.03	603.91
										-35.1562	25.5067		-35.1562	23.742		-35.1562	20.777		-35.1562	14.5757						-35.1562	41.0009	-35.1562	26.6204							0.0835363	0.793164	1.21	-20	-15.156	-13.906	-7.8125	-5.9375	5.1563	88.594	179.22	290.31	478.13	618.59
										-34.6094	27.2087		-34.6094	25.3806		-34.6094	22.2652		-34.6094	15.6447						-34.6094	43.8229	-34.6094	28.5206							0.0881683	0.790025	1.215	-18.594	-18.75	-15.625	-8.125	-5.3125	5	87.031	181.25	295.47	476.72	610.78
										-34.0625	29.0224		-34.0625	27.1302		-34.0625	23.8577		-34.0625	16.7905						-34.0625	46.8338	-34.0625	30.5525							0.0930572	0.786876	1.22	-23.125	-20	-11.25	-12.344	-7.9688	9.0625	83.75	187.19	303.13	482.19	644.84
										-33.5156	30.9547		-33.5156	28.998		-33.5156	25.5615		-33.5156	18.0183						-33.5156	50.0455	-33.5156	32.7247							0.0982172	0.783717	1.225	-22.969	-18.906	-14.063	-8.125	-3.4375	5.7813	86.25	189.06	302.66	497.5	650.47
										-32.9688	33.0132		-32.9688	30.9916		-32.9688	27.3838		-32.9688	19.3339						-32.9688	53.4705	-32.9688	35.0462							0.103663	0.780551	1.23	-18.438	-16.875	-12.656	-12.031	-5.4688	2.8125	88.281	185.78	316.88	499.06	643.44
										-32.4219	35.2057		-32.4219	33.119		-32.4219	29.3326		-32.4219	20.743						-32.4219	57.122	-32.4219	37.5264							0.109411	0.777377	1.235	-20.156	-16.875	-13.281	-8.9063	-6.875	4.375	90.781	194.22	304.22	490.31	638.28
										-31.875	37.5405		-31.875	35.3889		-31.875	31.416		-31.875	22.252						-31.875	61.0139	-31.875	40.1754							0.115478	0.774196	1.24	-20	-18.438	-13.281	-12.5	-4.6875	8.5938	95.781	189.69	319.84	505.47	646.09
										-31.3281	40.0265		-31.3281	37.8102		-31.3281	33.6428		-31.3281	23.8675						-31.3281	65.1607	-31.3281	43.0036							0.121881	0.77101	1.245	-19.688	-19.531	-13.281	-9.0625	-7.8125	8.4375	96.25	201.72	325.47	507.81	639.38
										-30.7812	42.6729		-30.7812	40.3925		-30.7812	36.0223		-30.7812	25.5966						-30.7812	69.5777	-30.7812	46.0221							0.12864	0.76782	1.25	-21.25	-14.844	-12.969	-10.469	-7.3438	5.9375	96.719	199.06	337.81	519.53	657.5
										-30.2344	45.4896		-30.2344	43.1457		-30.2344	38.564		-30.2344	27.4468						-30.2344	74.2808	-30.2344	49.2425							0.135773	0.764625	1.255	-22.656	-18.75	-12.344	-12.5	-4.5313	7.3438	97.031	191.72	322.03	522.97	658.91
										-29.6875	48.4867		-29.6875	46.0805		-29.6875	41.2782		-29.6875	29.4258						-29.6875	79.2869	-29.6875	52.6767							0.143301	0.761428	1.26	-21.25	-17.031	-13.438	-11.406	-5	7.5	90.781	196.88	329.84	522.66	661.56
										-29.1406	51.6753		-29.1406	49.208		-29.1406	44.1757		-29.1406	31.5418						-29.1406	84.6132	-29.1406	56.3372							0.151247	0.758229	1.265	-24.688	-20.625	-12.5	-10.625	-5.7813	10.156	91.094	199.06	329.53	518.75	663.44
										-28.5938	55.0665		-28.5938	52.5399		-28.5938	47.2675		-28.5938	33.8037						-28.5938	90.2779	-28.5938	60.2372							0.159634	0.755029	1.27	-22.344	-15.469	-12.344	-14.219	-3.4375	7.5	94.531	197.03	324.06	507.34	657.34
										-28.0469	58.6725		-28.0469	56.0883		-28.0469	50.5655		-28.0469	36.2203						-28.0469	96.2999	-28.0469	64.3902							0.168485	0.751829	1.275	-23.906	-16.875	-14.375	-8.2813	-9.8438	8.9063	100.63	198.28	329.84	529.84	668.28
										-27.5	62.5057		-27.5	59.8662		-27.5	54.082		-27.5	38.8014						-27.5	102.699	-27.5	68.8102							0.177828	0.74863	1.28	-20.625	-16.25	-13.281	-11.094	-8.9063	6.4063	99.844	202.81	329.53	537.97	665
										-26.9531	66.5792		-26.9531	63.887		-26.9531	57.8298		-26.9531	41.5568						-26.9531	109.494	-26.9531	73.5116							0.187688	0.745433	1.285	-23.906	-14.688	-11.563	-11.406	-5.625	10.469	102.03	194.06	331.41	529.69	647.03
										-26.4062	70.9069		-26.4062	68.1646		-26.4062	61.8222		-26.4062	44.4968						-26.4062	116.708	-26.4062	78.5092							0.198096	0.742239	1.29	-20.156	-17.813	-16.094	-11.094	-5.9375	12.031	105.47	190.78	333.44	544.22	654.38
										-25.8594	75.5029		-25.8594	72.7137		-25.8594	66.073		-25.8594	47.6323						-25.8594	124.36	-25.8594	83.8182							0.20908	0.739048	1.295	-20.781	-20	-14.531	-11.406	-6.875	10.938	104.38	205	340.78	534.38	670.16
										-25.3125	80.3822		-25.3125	77.5495		-25.3125	70.5964		-25.3125	50.9744						-25.3125	132.474	-25.3125	89.4542							0.220673	0.735862	1.3	-20.781	-16.719	-12.188	-10.938	-7.3438	13.125	101.72	205.94	345.47	556.88	685.47
										-24.7656	85.5604		-24.7656	82.6876		-24.7656	75.4073		-24.7656	54.5348						-24.7656	141.07	-24.7656	95.4327							0.23291	0.732682	1.305	-21.25	-14.531	-13.906	-9.0625	-5.4688	10.156	104.69	208.28	348.13	551.09	702.5
										-24.2188	91.0536		-24.2188	88.1444		-24.2188	80.5208		-24.2188	58.3252						-24.2188	150.173	-24.2188	101.77							0.245824	0.729508	1.31	-19.219	-18.594	-11.25	-10	-6.4063	14.844	100.16	207.5	357.03	532.81	692.97
										-23.6719	96.8785		-23.6719	93.9367		-23.6719	85.9524		-23.6719	62.3579						-23.6719	159.804	-23.6719	108.481							0.259455	0.726341	1.315	-20	-15.156	-15.625	-11.719	-6.25	13.906	96.406	211.41	352.97	546.72	689.53
										-23.125	103.052		-23.125	100.082		-23.125	91.7179		-23.125	66.6454						-23.125	169.988	-23.125	115.583							0.273842	0.723183	1.32	-20.938	-17.5	-14.063	-10.625	-6.4063	13.281	98.125	197.66	350.47	555.78	695.47
										-22.5781	109.593		-22.5781	106.597		-22.5781	97.8335		-22.5781	71.2004						-22.5781	180.746	-22.5781	123.09							0.289026	0.720034	1.325	-24.375	-21.875	-14.219	-15.781	-8.2813	10.156	103.91	215.78	350.47	560	691.25
										-22.0312	116.519		-22.0312	113.502		-22.0312	104.315		-22.0312	76.0358						-22.0312	192.102	-22.0312	131.019							0.305053	0.716895	1.33	-19.844	-18.438	-14.375	-10.469	-6.4063	13.281	99.375	206.25	368.13	550.63	702.5
										-21.4844	123.848		-21.4844	120.813		-21.4844	111.179		-21.4844	81.1645						-21.4844	204.078	-21.4844	139.384							0.321968	0.713767	1.335	-25.313	-14.844	-12.031	-11.094	-5	10.156	100.78	220.16	356.41	575.47	721.25
										-20.9375	131.601		-20.9375	128.551		-20.9375	118.443		-20.9375	86.5995						-20.9375	216.697	-20.9375	148.2							0.339821	0.710651	1.34	-25	-20	-14.375	-12.188	-7.6563	11.25	101.88	220.78	364.22	557.34	712.19
										-20.3906	139.796		-20.3906	136.733		-20.3906	126.121		-20.3906	92.3536						-20.3906	229.98	-20.3906	157.479							0.358664	0.707547	1.345	-20	-16.875	-13.594	-10	-8.4375	12.031	97.188	210.47	379.69	573.44	710.31
										-19.8438	148.454		-19.8438	145.379		-19.8438	134.229		-19.8438	98.4396						-19.8438	243.947	-19.8438	167.235							0.378552	0.704456	1.35	-21.563	-15.938	-14.375	-11.719	-4.6875	9.8438	99.063	212.03	372.34	559.22	688.59
										-19.2969	157.594		-19.2969	154.508		-19.2969	142.784		-19.2969	104.87						-19.2969	258.617	-19.2969	177.48							0.399542	0.70138	1.355	-25	-15.469	-12.969	-12.5	-7.3438	11.406	101.09	215.78	381.41	563.59	687.5
										-18.75	167.237		-18.75	164.138		-18.75	151.8		-18.75	111.656						-18.75	274.008	-18.75	188.222							0.421697	0.698319	1.36	-20	-17.344	-15	-13.125	-6.25	10.313	93.438	217.03	386.88	575.94	723.13
										-18.2031	177.403		-18.2031	174.288		-18.2031	161.29		-18.2031	118.809						-18.2031	290.137	-18.2031	199.47							0.445079	0.695274	1.365	-22.188	-15.313	-14.219	-10.938	-4.8438	12.344	99.063	224.53	365.94	571.72	726.09
										-17.6562	188.111		-17.6562	184.976		-17.6562	171.269		-17.6562	126.341						-17.6562	307.017	-17.6562	211.231							0.469759	0.692245	1.37	-21.406	-19.063	-12.031	-14.219	-4.2188	17.031	98.594	216.25	392.5	577.5	727.81
										-17.1094	199.382		-17.1094	196.22		-17.1094	181.747		-17.1094	134.259						-17.1094	324.66	-17.1094	223.509							0.495807	0.689234	1.375	-19.219	-17.344	-14.531	-13.75	-8.2813	12.344	103.75	221.09	385.16	583.91	730.78
										-16.5625	211.234		-16.5625	208.034		-16.5625	192.736		-16.5625	142.574						-16.5625	343.075	-16.5625	236.307							0.523299	0.68624	1.38	-21.563	-16.875	-15.313	-15.781	-3.5938	14.063	102.97	226.41	393.59	578.13	723.28
										-16.0156	223.687		-16.0156	220.436		-16.0156	204.244		-16.0156	151.292						-16.0156	362.267	-16.0156	249.623							0.552316	0.683265	1.385	-22.188	-13.75	-12.969	-10	-9.0625	16.563	106.88	229.06	395.16	583.28	714.53
										-15.4688	236.759		-15.4688	233.439		-15.4688	216.277		-15.4688	160.419						-15.4688	382.241	-15.4688	263.455							0.582942	0.68031	1.39	-22.813	-14.219	-13.594	-8.125	-4.8438	14.844	112.19	229.84	398.28	589.38	714.22
										-14.9219	250.466		-14.9219	247.056		-14.9219	228.842		-14.9219	169.959						-14.9219	402.995	-14.9219	277.797							0.615265	0.677375	1.395	-21.25	-15.781	-16.719	-10.469	-3.9063	9.375	108.91	229.38	386.88	596.72	722.97
										-14.375	264.824		-14.375	261.297		-14.375	241.94		-14.375	179.914						-14.375	424.525	-14.375	292.639							0.649382	0.67446	1.4	-22.969	-15.781	-11.094	-9.0625	-6.25	16.719	106.88	230.78	382.81	579.69	713.28
										-13.8281	279.848		-13.8281	276.172		-13.8281	255.572		-13.8281	190.285						-13.8281	446.822	-13.8281	307.969							0.68539	0.671567	1.405	-23.594	-18.594	-13.281	-12.656	-5	14.844	110.47	237.19	387.66	597.5	722.34
										-13.2812	295.551		-13.2812	291.687		-13.2812	269.735		-13.2812	201.068						-13.2812	469.873	-13.2812	323.772							0.723394	0.668696	1.41	-20.625	-15.938	-15.156	-11.25	-6.4063	16.406	100.63	234.53	383.28	583.75	737.5
										-12.7344	311.942		-12.7344	307.847		-12.7344	284.424		-12.7344	212.261						-12.7344	493.662	-12.7344	340.027							0.763506	0.665847	1.415	-21.719	-17.188	-17.813	-9.375	-9.6875	15.313	100.31	238.44	389.06	601.41	733.13
										-12.1875	329.032		-12.1875	324.652		-12.1875	299.629		-12.1875	223.856						-12.1875	518.165	-12.1875	356.713							0.805842	0.663022	1.42	-22.656	-17.031	-15.938	-9.5313	-7.1875	10.781	100.78	236.72	392.81	600	734.69
										-11.6406	346.827		-11.6406	342.101		-11.6406	315.338		-11.6406	235.842						-11.6406	543.356	-11.6406	373.803							0.850526	0.66022	1.425	-24.844	-16.875	-15.156	-8.5938	-7.0313	7.1875	102.66	235.16	400.78	598.91	751.88
										-11.0938	365.33		-11.0938	360.19		-11.0938	331.536		-11.0938	248.208						-11.0938	569.204	-11.0938	391.268							0.897687	0.657442	1.43	-22.344	-17.031	-10.625	-9.5313	-5	8.2813	105	232.66	393.44	594.69	741.88
										-10.5469	384.542		-10.5469	378.91		-10.5469	348.205		-10.5469	260.939						-10.5469	595.672	-10.5469	409.076							0.947464	0.654689	1.435	-23.125	-17.344	-14.531	-9.375	-4.2188	10.625	103.28	241.72	401.72	612.19	737.5
										-10	404.462		-10	398.25		-10	365.321		-10	274.016						-10	622.718	-10	427.191							1	0.65196	1.44	-21.25	-19.375	-14.063	-10	-8.125	11.094	104.06	227.5	398.28	605.63	729.84
										-9.45312	425.083		-9.45312	418.194		-9.45312	382.859		-9.45312	287.418						-9.45312	650.298	-9.45312	445.573							1.05545	0.649258	1.445	-20	-16.875	-12.031	-12.031	-5	8.2813	104.53	235.94	403.91	600.31	725.78
										-8.90625	446.397		-8.90625	438.723		-8.90625	400.789		-8.90625	301.121						-8.90625	678.361	-8.90625	464.183							1.11397	0.646581	1.45	-22.5	-12.344	-12.656	-12.188	-5.9375	8.125	115.47	231.25	396.88	607.66	739.84
										-8.35938	468.392		-8.35938	459.814		-8.35938	419.078		-8.35938	315.099						-8.35938	706.853	-8.35938	482.978							1.17574	0.643931	1.455	-25.313	-18.594	-12.188	-12.813	-6.7188	10.313	110.78	229.69	406.88	617.34	729.38
										-7.8125	491.05		-7.8125	481.439		-7.8125	437.692		-7.8125	329.323						-7.8125	735.716	-7.8125	501.911							1.24094	0.641307	1.46	-24.531	-17.5	-12.5	-7.3438	-8.75	12.5	102.03	235.47	406.72	637.81	729.22
										-7.26562	514.352		-7.26562	503.567		-7.26562	456.59		-7.26562	343.762						-7.26562	764.889	-7.26562	520.938							1.30975	0.638711	1.465	-20	-18.594	-13.125	-12.969	-4.8438	11.875	102.34	229.22	422.81	642.34	734.69
										-6.71875	538.272		-6.71875	526.164		-6.71875	475.731		-6.71875	358.382						-6.71875	794.309	-6.71875	540.01							1.38237	0.636142	1.47	-19.531	-17.188	-13.281	-13.594	-4.5313	8.9063	104.53	231.72	418.91	630.78	729.38
										-6.17188	562.783		-6.17188	549.19		-6.17188	495.072		-6.17188	373.149						-6.17188	823.909	-6.17188	559.081							1.45902	0.6336	1.475	-21.875	-20.625	-15.313	-11.875	-5.7813	10.156	103.91	247.97	414.06	624.06	717.66
										-5.625	587.851		-5.625	572.605		-5.625	514.568		-5.625	388.024						-5.625	853.621	-5.625	578.102							1.53993	0.631087	1.48	-20.313	-16.563	-16.25	-9.8438	-4.0625	11.094	108.59	236.88	412.5	634.69	737.97
										-5.07812	613.441		-5.07812	596.361		-5.07812	534.17		-5.07812	402.971						-5.07812	883.377	-5.07812	597.027							1.62531	0.628602	1.485	-20.938	-17.656	-12.813	-14.844	-6.0938	10.313	100.16	242.19	415.16	627.5	736.88
										-4.53125	639.512		-4.53125	620.412		-4.53125	553.831		-4.53125	417.952						-4.53125	913.108	-4.53125	615.809							1.71544	0.626145	1.49	-24.688	-18.125	-15.156	-9.375	-10.781	12.5	102.97	239.53	416.88	649.22	743.59
										-3.98438	666.021		-3.98438	644.706		-3.98438	573.502		-3.98438	432.926						-3.98438	942.744	-3.98438	634.404							1.81056	0.623717	1.495	-20.781	-16.719	-13.281	-11.25	-5.3125	16.563	107.81	247.03	417.97	632.97	755.16
										-3.4375	692.919		-3.4375	669.19		-3.4375	593.134		-3.4375	447.856						-3.4375	972.218	-3.4375	652.768							1.91095	0.621318	1.5	-22.031	-15.781	-12.813	-12.813	-4.0625	17.188	105.63	241.09	423.59	644.69	758.75
										-2.89062	720.156		-2.89062	693.81		-2.89062	612.679		-2.89062	462.703						-2.89062	1001.46	-2.89062	670.86							2.01691	0.618948	1.505	-26.875	-17.344	-12.5	-13.75	-9.5313	22.031	105.94	247.03	419.84	646.72	759.53
										-2.34375	747.68		-2.34375	718.509		-2.34375	632.089		-2.34375	477.43						-2.34375	1030.42	-2.34375	688.643							2.12875	0.616608	1.51	-23.281	-16.406	-12.813	-10.156	-7.8125	23.125	104.69	242.19	431.25	652.34	744.69
										-1.79688	775.435		-1.79688	743.231		-1.79688	651.317		-1.79688	492						-1.79688	1059.01	-1.79688	706.082							2.24679	0.614297	1.515	-23.125	-16.563	-10.781	-11.25	-6.5625	15.313	114.38	246.41	431.56	654.22	749.22
										-1.25	803.363		-1.25	767.919		-1.25	670.32		-1.25	506.379						-1.25	1087.19	-1.25	723.143							2.37137	0.612015	1.52	-24.688	-17.344	-13.125	-12.344	-4.5313	18.125	110.94	253.44	423.44	675.63	758.59
										-0.703125	831.406		-0.703125	792.516		-0.703125	689.055		-0.703125	520.533						-0.703125	1114.91	-0.703125	739.797							2.50287	0.609763	1.525	-25.469	-17.813	-14.219	-9.5313	-4.2188	16.406	107.97	240.63	446.56	679.84	762.81
										-0.15625	859.503		-0.15625	816.967		-0.15625	707.481		-0.15625	534.433						-0.15625	1142.1	-0.15625	756.019							2.64165	0.60754	1.53	-20.781	-13.906	-15.156	-13.906	-5.7813	17.188	122.19	238.75	427.97	678.91	742.66
										0.390625	887.594		0.390625	841.217		0.390625	725.562		0.390625	548.05						0.390625	1168.73	0.390625	771.787							2.78813	0.605347	1.535	-22.813	-17.656	-12.813	-8.5938	-2.5	18.125	111.56	245.16	428.91	660.63	750.47
										0.9375	915.619		0.9375	865.213		0.9375	743.264		0.9375	561.358						0.9375	1194.74	0.9375	787.081							2.94273	0.603184	1.54	-20.781	-18.906	-14.531	-12.656	-5.625	14.844	111.56	250.78	437.81	657.66	752.81
										1.48438	943.518		1.48438	888.906		1.48438	760.556		1.48438	574.334						1.48438	1220.11	1.48438	801.886							3.1059	0.601051	1.545	-21.875	-18.281	-15.313	-11.563	-2.5	14.219	108.28	259.38	433.59	658.44	759.84
										2.03125	971.232		2.03125	912.247		2.03125	777.411		2.03125	586.959						2.03125	1244.8	2.03125	816.19							3.27812	0.598947	1.55	-23.594	-15.781	-14.063	-11.719	-7.5	12.813	101.41	254.22	437.19	660.47	766.41
										2.57812	998.705		2.57812	935.191		2.57812	793.804		2.57812	599.214						2.57812	1268.78	2.57812	829.983							3.45989	0.596873	1.555	-23.594	-17.188	-14.375	-10.469	-4.0625	15.625	106.41	248.59	444.38	651.25	773.13
										3.125	1025.88		3.125	957.698		3.125	809.715		3.125	611.085						3.125	1292.03	3.125	843.261							3.65174	0.594829	1.56	-20.781	-16.563	-11.875	-14.844	-7.1875	21.563	104.84	263.44	441.72	654.53	788.75
										3.67188	1052.71		3.67188	979.729		3.67188	825.128		3.67188	622.562						3.67188	1314.53	3.67188	856.019							3.85423	0.592815	1.565	-23.438	-17.344	-16.719	-17.344	-5	9.2188	108.59	258.75	440.63	661.88	770.63
										4.21875	1079.13		4.21875	1001.25		4.21875	840.029		4.21875	633.634						4.21875	1336.26	4.21875	868.259							4.06794	0.59083	1.57	-22.969	-17.031	-11.406	-17.656	-5	17.031	112.03	263.44	431.09	672.34	776.56
										4.76562	1105.11		4.76562	1022.23		4.76562	854.408		4.76562	644.296						4.76562	1357.22	4.76562	879.981							4.29351	0.588874	1.575	-25.781	-17.5	-10.625	-13.438	-5.3125	17.031	101.56	261.09	435.78	661.56	783.75
										5.3125	1130.61		5.3125	1042.65		5.3125	868.257		5.3125	654.544						5.3125	1377.41	5.3125	891.192							4.53158	0.586948	1.58	-24.219	-16.406	-14.531	-12.188	-4.5313	15.469	104.69	256.41	447.03	668.75	782.34
										5.85938	1155.57		5.85938	1062.47		5.85938	881.574		5.85938	664.376						5.85938	1396.81	5.85938	901.896							4.78286	0.585052	1.585	-25.313	-20.469	-14.688	-12.969	-5.4688	16.406	112.81	267.34	439.06	655.94	760.31
										6.40625	1179.97		6.40625	1081.69		6.40625	894.357		6.40625	673.793						6.40625	1415.43	6.40625	912.103							5.04807	0.583184	1.59	-23.125	-22.5	-12.656	-8.5938	-5.1563	20.313	104.38	260.78	440.31	666.09	768.75
										6.95312	1203.77		6.95312	1100.29		6.95312	906.607		6.95312	682.798						6.95312	1433.27	6.95312	921.823							5.32798	0.581346	1.595	-25.313	-20.625	-12.344	-11.563	-3.4375	14.844	117.19	246.25	442.5	674.69	776.56
										7.5	1226.95		7.5	1118.25		7.5	918.329		7.5	691.396						7.5	1450.36	7.5	931.068							5.62341	0.579536	1.6	-22.969	-20.625	-12.813	-14.219	-7.6563	18.75	107.5	258.44	449.84	672.19	769.53
										8.04688	1249.48		8.04688	1135.57		8.04688	929.529		8.04688	699.593						8.04688	1466.68	8.04688	939.849							5.93523	0.577755	1.605	-26.094	-16.406	-16.25	-11.719	-5	19.375	115.63	265.16	451.25	662.34	770.47
										8.59375	1271.34		8.59375	1152.25		8.59375	940.215		8.59375	707.396						8.59375	1482.27	8.59375	948.181							6.26434	0.576003	1.61	-20	-17.5	-12.5	-9.6875	-4.2188	16.719	113.91	259.06	449.22	671.09	761.09
										9.14062	1292.52		9.14062	1168.28		9.14062	950.397		9.14062	714.815						9.14062	1497.13	9.14062	956.078							6.61169	0.574279	1.615	-21.563	-15.781	-16.563	-10	-4.375	18.281	110.78	255.94	446.09	659.84	749.69
										9.6875	1313.01		9.6875	1183.67		9.6875	960.086		9.6875	721.858						9.6875	1511.28	9.6875	963.554							6.97831	0.572584	1.62	-23.594	-17.656	-10.625	-11.875	-3.9063	13.125	115.16	271.25	447.81	665	745.16
										10.2344	1332.79		10.2344	1198.42		10.2344	969.294		10.2344	728.538						10.2344	1524.74	10.2344	970.626							7.36525	0.570916	1.625	-22.813	-19.063	-13.75	-11.094	-5.7813	14.375	121.25	268.75	457.19	669.38	743.91
										10.7812	1351.86		10.7812	1212.53		10.7812	978.035		10.7812	734.865						10.7812	1537.54	10.7812	977.309							7.77365	0.569276	1.63	-20.781	-16.094	-13.125	-11.406	-5.3125	13.75	116.09	254.22	441.72	663.91	747.34
										11.3281	1370.23		11.3281	1226.03		11.3281	986.325		11.3281	740.851						11.3281	1549.68	11.3281	983.618							8.2047	0.567664	1.635	-22.5	-15.313	-15	-11.719	-2.1875	14.688	110.78	257.66	444.22	668.44	759.38
										11.875	1387.89		11.875	1238.91		11.875	994.177		11.875	746.509						11.875	1561.2	11.875	989.571							8.65964	0.566079	1.64	-23.594	-17.031	-14.531	-11.875	-1.7188	19.375	110.16	264.22	443.75	658.59	748.91
										12.4219	1404.84		12.4219	1251.19		12.4219	1001.61		12.4219	751.852						12.4219	1572.12	12.4219	995.182							9.13982	0.564521	1.645	-25.469	-22.813	-15.625	-10.625	-4.6875	14.375	109.84	255.16	454.53	662.97	770.78
										12.9688	1421.1		12.9688	1262.89		12.9688	1008.63		12.9688	756.893						12.9688	1582.45	12.9688	1000.47							9.64662	0.56299	1.65	-24.531	-15.938	-15.938	-13.594	-0.9375	13.906	112.81	254.69	465.63	661.09	790
										13.5156	1436.67		13.5156	1274.03		13.5156	1015.27		13.5156	761.644						13.5156	1592.23	13.5156	1005.44							10.1815	0.561486	1.655	-28.125	-13.281	-13.75	-11.094	-6.875	16.719	114.84	257.19	456.09	658.28	776.88
										14.0625	1451.56		14.0625	1284.61		14.0625	1021.53		14.0625	766.118						14.0625	1601.47	14.0625	1010.12							10.7461	0.560007	1.66	-23.125	-17.969	-12.344	-11.406	-3.2813	17.969	116.72	262.5	470	668.59	774.69
										14.6094	1465.79		14.6094	1294.65		14.6094	1027.44		14.6094	770.329						14.6094	1610.2	14.6094	1014.52							11.3419	0.558555	1.665	-23.438	-16.25	-13.75	-11.563	-5.1563	15.938	111.56	268.91	454.22	652.81	781.09
										15.1562	1479.37		15.1562	1304.18		15.1562	1033.01		15.1562	774.289						15.1562	1618.44	15.1562	1018.65							11.9709	0.557129	1.67	-22.031	-18.281	-11.25	-11.719	-3.9063	16.25	119.84	263.28	463.59	673.91	795.47
										15.7031	1492.32		15.7031	1313.21		15.7031	1038.25		15.7031	778.01						15.7031	1626.21	15.7031	1022.54							12.6346	0.555728	1.675	-22.656	-19.219	-14.531	-12.656	-5	20.469	122.03	259.84	456.25	670.31	790.94
										16.25	1504.66		16.25	1321.77		16.25	1043.18		16.25	781.504						16.25	1633.54	16.25	1026.18							13.3352	0.554353	1.68	-22.031	-17.813	-15	-12.344	-3.9063	21.094	113.44	264.38	471.09	667.97	812.5
										16.7969	1516.4		16.7969	1329.86		16.7969	1047.82		16.7969	784.784						16.7969	1640.44	16.7969	1029.6							14.0746	0.553002	1.685	-23.281	-16.875	-12.031	-12.188	-5	20.781	124.69	273.91	467.97	663.28	809.06
										17.3438	1527.56		17.3438	1337.51		17.3438	1052.18		17.3438	787.861						17.3438	1646.94	17.3438	1032.8							14.8551	0.551676	1.69	-21.875	-17.188	-14.688	-12.344	-1.25	20.469	122.5	275.94	467.81	685.78	793.44
										17.8906	1538.16		17.8906	1344.74		17.8906	1056.28		17.8906	790.745						17.8906	1653.06	17.8906	1035.81							15.6788	0.550375	1.695	-26.25	-18.438	-17.344	-8.9063	-6.5625	16.563	124.84	268.91	472.34	672.19	784.53
										18.4375	1548.22		18.4375	1351.57		18.4375	1060.12		18.4375	793.448						18.4375	1658.82	18.4375	1038.62							16.5482	0.549097	1.7	-24.375	-19.219	-15.469	-10	-3.9063	15	125.63	282.66	475.94	663.44	770.47
										18.9844	1557.76		18.9844	1358.01		18.9844	1063.73		18.9844	795.979						18.9844	1664.24	18.9844	1041.26							17.4658	0.547844	1.705	-26.094	-15.625	-14.688	-13.438	-7.0313	18.281	117.5	274.53	478.75	681.09	767.19
										19.5312	1566.81		19.5312	1364.08		19.5312	1067.12		19.5312	798.349						19.5312	1669.32	19.5312	1043.72							18.4342	0.546614	1.71	-20.625	-18.906	-14.063	-12.5	-4.5313	20.938	119.06	279.69	481.41	680.16	779.69
										20.0781	1575.37		20.0781	1369.8		20.0781	1070.29		20.0781	800.567						20.0781	1674.11	20.0781	1046.03							19.4564	0.545406	1.715	-20	-19.063	-12.031	-10.625	-3.4375	14.844	116.72	280.63	468.59	674.84	783.91
										20.625	1583.48		20.625	1375.2		20.625	1073.27		20.625	802.641						20.625	1678.6	20.625	1048.2							20.5353	0.544222	1.72	-25	-17.188	-13.281	-10.781	-4.6875	22.031	121.72	269.53	473.28	691.09	769.06
										21.1719	1591.15		21.1719	1380.27		21.1719	1076.06		21.1719	804.581						21.1719	1682.82	21.1719	1050.22							21.6739	0.543061	1.725	-25.938	-17.813	-13.281	-7.1875	-7.5	16.563	118.44	264.53	472.66	698.75	779.53
										21.7188	1598.4		21.7188	1385.05		21.7188	1078.67		21.7188	806.395						21.7188	1686.77	21.7188	1052.11							22.8757	0.541921	1.73	-23.594	-16.719	-13.281	-13.438	-6.0938	15.313	123.28	269.38	476.88	684.38	775.94
										22.2656	1605.25		22.2656	1389.54		22.2656	1081.11		22.2656	808.089						22.2656	1690.49	22.2656	1053.88							24.1442	0.540804	1.735	-30.156	-18.75	-13.281	-11.25	-5.625	17.031	124.06	267.97	468.75	673.13	797.34
										22.8125	1611.72		22.8125	1393.77		22.8125	1083.4		22.8125	809.673						22.8125	1693.97	22.8125	1055.53							25.483	0.539708	1.74	-26.563	-18.906	-14.531	-8.2813	-6.25	21.719	119.53	270.16	491.09	683.59	810
										23.3594	1617.82		23.3594	1397.74		23.3594	1085.54		23.3594	811.152						23.3594	1697.24	23.3594	1057.07							26.896	0.538634	1.745	-22.656	-18.281	-16.719	-10.625	-7.8125	20.938	122.34	265	468.44	678.91	801.09
										23.9062	1623.58		23.9062	1401.47		23.9062	1087.54		23.9062	812.532						23.9062	1700.3	23.9062	1058.51							28.3874	0.53758	1.75	-23.281	-16.719	-15.625	-8.125	-3.4375	21.094	128.44	265.31	473.59	686.88	795.31
										24.4531	1629.01		24.4531	1404.98		24.4531	1089.42		24.4531	813.821						24.4531	1703.17	24.4531	1059.86							29.9614	0.536547	1.755	-24.688	-19.063	-13.281	-13.281	-1.5625	21.875	125.16	262.34	485.94	697.34	790
										25	1634.13		25	1408.27		25	1091.17		25	815.024						25	1705.86	25	1061.12							31.6228	0.535535	1.76	-23.125	-18.281	-13.75	-8.75	-7.1875	21.406	128.59	270.78	498.28	702.19	789.22
										25.5469	1638.95		25.5469	1411.36		25.5469	1092.81		25.5469	816.147						25.5469	1708.38	25.5469	1062.3							33.3762	0.534543	1.765	-24.844	-16.25	-16.25	-10.625	-4.6875	19.531	122.34	265.63	491.09	702.03	785
										26.0938	1643.5		26.0938	1414.25		26.0938	1094.34		26.0938	817.194						26.0938	1710.75	26.0938	1063.39							35.2269	0.53357	1.77	-24.219	-17.031	-15.469	-10.938	-4.0625	24.219	117.97	274.38	478.28	704.38	796.56
										26.6406	1647.77		26.6406	1416.97		26.6406	1095.77		26.6406	818.171						26.6406	1712.96	26.6406	1064.42							37.1803	0.532617	1.775	-21.875	-18.438	-15.938	-12.656	-2.0313	21.094	122.03	285.31	472.66	712.97	789.38
										27.1875	1651.8		27.1875	1419.52		27.1875	1097.1		27.1875	819.082						27.1875	1715.03	27.1875	1065.37							39.2419	0.531683	1.78	-22.031	-16.719	-12.031	-12.969	-3.4375	18.75	124.53	276.25	476.25	702.34	781.88
										27.7344	1655.59		27.7344	1421.91		27.7344	1098.35		27.7344	819.931						27.7344	1716.97	27.7344	1066.27							41.4178	0.530768	1.785	-22.031	-17.5	-12.344	-10.313	-5.7813	16.406	124.53	269.84	480.31	701.09	797.66
										28.2812	1659.15		28.2812	1424.15		28.2812	1099.51		28.2812	820.723						28.2812	1718.78	28.2812	1067.1							43.7144	0.529871	1.79	-21.094	-18.438	-14.219	-12.344	-3.2813	17.5	129.38	287.19	488.59	703.28	795.31
										28.8281	1662.5		28.8281	1426.25		28.8281	1100.6		28.8281	821.461						28.8281	1720.48	28.8281	1067.88							46.1384	0.528993	1.795	-21.25	-16.563	-13.438	-7.8125	-3.125	14.063	132.97	277.5	485.31	708.59	776.09
										29.375	1665.65		29.375	1428.22		29.375	1101.62		29.375	822.15						29.375	1722.07	29.375	1068.6							48.6968	0.528133	1.8	-28.906	-16.563	-13.281	-12.813	-1.25	13.438	128.59	279.38	487.97	712.03	778.59
										29.9219	1668.61		29.9219	1430.07		29.9219	1102.57		29.9219	822.791						29.9219	1723.56	29.9219	1069.28							51.397	0.52729	1.805	-24.219	-15.938	-11.406	-11.563	-4.2188	13.594	127.5	281.09	491.88	726.72	796.25
										30.4688	1671.4		30.4688	1431.79		30.4688	1103.45		30.4688	823.388						30.4688	1724.95	30.4688	1069.91							54.2469	0.526464	1.81	-20.781	-17.813	-10	-9.6875	-1.5625	14.375	118.59	280.47	489.69	720.63	797.81
										31.0156	1674.01		31.0156	1433.41		31.0156	1104.28		31.0156	823.945						31.0156	1726.25	31.0156	1070.5							57.2549	0.525656	1.815	-23.594	-14.063	-12.969	-9.5313	-8.75	14.844	123.91	282.34	492.03	712.66	775.94
										31.5625	1676.47		31.5625	1434.93		31.5625	1105.05		31.5625	824.464						31.5625	1727.47	31.5625	1071.05							60.4296	0.524864	1.82	-23.75	-16.406	-16.406	-12.656	-2.3438	17.656	131.41	283.91	498.91	714.22	797.5
										32.1094	1678.77		32.1094	1436.34		32.1094	1105.77		32.1094	824.947						32.1094	1728.61	32.1094	1071.56							63.7804	0.524089	1.825	-23.594	-21.563	-16.875	-14.219	-3.4375	19.219	137.5	297.66	485.31	708.44	776.88
										32.6562	1680.94		32.6562	1437.67		32.6562	1106.44		32.6562	825.397						32.6562	1729.67	32.6562	1072.04							67.317	0.52333	1.83	-23.594	-18.281	-12.813	-12.344	-2.9688	16.25	131.88	290.47	482.81	721.56	777.81
										33.2031	1682.97		33.2031	1438.91		33.2031	1107.07		33.2031	825.817						33.2031	1730.67	33.2031	1072.48							71.0497	0.522587	1.835	-23.906	-19.375	-11.406	-11.563	-3.9063	19.688	124.06	287.97	492.19	725.63	778.13
										33.75	1684.88		33.75	1440.08		33.75	1107.65		33.75	826.207						33.75	1731.6	33.75	1072.9							74.9894	0.521859	1.84	-24.531	-17.031	-12.969	-12.656	-7.3438	17.344	127.34	294.22	500	706.09	773.75
										34.2969	1686.67		34.2969	1441.17		34.2969	1108.2		34.2969	826.571						34.2969	1732.47	34.2969	1073.28							79.1476	0.521147	1.845	-21.563	-18.594	-12.344	-6.875	-4.0625	21.094	123.13	294.84	486.56	724.53	769.53
										34.8438	1688.35		34.8438	1442.18		34.8438	1108.7		34.8438	826.909						34.8438	1733.29	34.8438	1073.64							83.5363	0.520449	1.85	-19.688	-12.344	-11.094	-8.9063	-5.625	19.844	124.38	294.38	495.63	727.97	790
										35.3906	1689.93		35.3906	1443.14		35.3906	1109.18		35.3906	827.225						35.3906	1734.05	35.3906	1073.98							88.1683	0.519767	1.855	-23.906	-15.781	-15	-13.906	-8.4375	21.563	122.97	296.56	508.59	720.78	790.31
										35.9375	1691.41		35.9375	1444.03		35.9375	1109.62		35.9375	827.519						35.9375	1734.76	35.9375	1074.29							93.0572	0.519099	1.86	-20.625	-19.219	-15.469	-10	-7.1875	21.719	131.09	294.38	501.72	722.19	787.81
										36.4844	1692.8		36.4844	1444.86		36.4844	1110.03		36.4844	827.792						36.4844	1735.43	36.4844	1074.59							98.2172	0.518445	1.865	-24.219	-16.25	-15	-10.938	-3.5938	23.281	128.91	297.97	502.34	711.41	775.31
										37.0312	1694.1		37.0312	1445.64		37.0312	1110.42		37.0312	828.046						37.0312	1736.05	37.0312	1074.86							103.663	0.517805	1.87	-24.219	-21.094	-14.531	-12.969	-8.4375	20.938	131.09	295.16	529.69	711.25	795.31
										37.5781	1695.32		37.5781	1446.37		37.5781	1110.78		37.5781	828.283						37.5781	1736.63	37.5781	1075.11							109.411	0.517179	1.875	-23.594	-17.656	-14.219	-12.5	-3.2813	22.344	128.75	294.53	510.47	703.28	811.72
										38.125	1696.47		38.125	1447.05		38.125	1111.11		38.125	828.504						38.125	1737.17	38.125	1075.35							115.478	0.516567	1.88	-20.625	-17.813	-12.656	-11.875	-4.8438	22.813	128.28	296.88	520.78	707.66	798.13
										38.6719	1697.54		38.6719	1447.69		38.6719	1111.42		38.6719	828.71						38.6719	1737.68	38.6719	1075.57							121.881	0.515967	1.885	-25	-16.563	-16.25	-10.469	-6.25	22.344	129.38	305.16	505.47	705.78	790.78
										39.2188	1698.55		39.2188	1448.29		39.2188	1111.71		39.2188	828.901						39.2188	1738.15	39.2188	1075.78							128.64	0.51538	1.89	-20	-17.656	-14.063	-12.344	-3.125	24.844	128.28	303.28	504.38	712.19	794.84
										39.7656	1699.49		39.7656	1448.85		39.7656	1111.99		39.7656	829.079						39.7656	1738.6	39.7656	1075.97							135.773	0.514807	1.895	-21.406	-17.656	-14.688	-10.469	-2.8125	26.563	122.81	295.47	503.75	705.63	809.22
										40.3125	1700.38		40.3125	1449.37		40.3125	1112.24		40.3125	829.244						40.3125	1739.01	40.3125	1076.15							143.301	0.514245	1.9	-20.625	-15.781	-13.906	-13.438	-2.3438	28.75	131.72	290.16	511.56	713.59	806.88
										40.8594	1701.21		40.8594	1449.86		40.8594	1112.47		40.8594	829.399						40.8594	1739.4	40.8594	1076.31							151.247	0.513696	1.905	-20.781	-21.25	-15.469	-9.6875	-4.375	23.281	125.31	287.5	504.53	700.16	807.34
										41.4062	1701.99		41.4062	1450.31		41.4062	1112.69		41.4062	829.542						41.4062	1739.76	41.4062	1076.47							159.634	0.513159	1.91	-19.375	-16.875	-15	-9.8438	-4.375	20.625	129.84	303.91	503.28	716.72	804.38
										41.9531	1702.71		41.9531	1450.74		41.9531	1112.9		41.9531	829.676						41.9531	1740.1	41.9531	1076.61							168.485	0.512633	1.915	-23.594	-16.094	-11.406	-11.094	-5.9375	21.719	128.44	297.66	517.97	707.66	805.94
										42.5	1703.4		42.5	1451.14		42.5	1113.09		42.5	829.8						42.5	1740.42	42.5	1076.75							177.828	0.512119	1.92	-24.531	-16.563	-11.563	-12.969	-3.2813	24.531	130.94	297.34	505.78	697.5	802.5
										43.0469	1704.04		43.0469	1451.51		43.0469	1113.27		43.0469	829.916						43.0469	1740.71	43.0469	1076.87							187.688	0.511616	1.925	-24.531	-18.438	-14.531	-11.25	-7.8125	22.344	132.81	292.97	493.75	704.38	796.72
										43.5938	1704.64		43.5938	1451.86		43.5938	1113.43		43.5938	830.024						43.5938	1740.99	43.5938	1076.99							198.096	0.511125	1.93	-22.813	-16.875	-15.156	-10.625	-2.6563	23.438	129.38	295.63	516.72	724.53	795.47
										44.1406	1705.2		44.1406	1452.19		44.1406	1113.59		44.1406	830.124						44.1406	1741.25	44.1406	1077.1							209.08	0.510644	1.935	-24.375	-18.594	-12.031	-11.406	-4.2188	19.375	128.91	291.56	524.84	728.13	803.44
										44.6875	1705.73		44.6875	1452.49		44.6875	1113.73		44.6875	830.217						44.6875	1741.49	44.6875	1077.2							220.673	0.510173	1.94	-20	-19.688	-10	-10.781	-4.8438	20.781	123.28	286.41	520.94	716.25	820.16
										45.2344	1706.22		45.2344	1452.78		45.2344	1113.87		45.2344	830.304						45.2344	1741.71	45.2344	1077.3							232.91	0.509713	1.945	-21.406	-17.813	-11.719	-11.094	-3.5938	23.125	132.19	292.5	518.75	727.19	828.59
										45.7812	1706.69		45.7812	1453.04		45.7812	1113.99		45.7812	830.385						45.7812	1741.92	45.7812	1077.39							245.824	0.509264	1.95	-20	-15.156	-15.156	-11.563	-4.8438	28.906	134.84	299.53	508.91	739.06	810.78
										46.3281	1707.12		46.3281	1453.29		46.3281	1114.11		46.3281	830.46						46.3281	1742.12	46.3281	1077.47							259.455	0.508824	1.955	-24.531	-17.344	-10.469	-12.5	-6.875	28.594	127.34	298.59	516.09	733.13	810.94
										46.875	1707.53		46.875	1453.52		46.875	1114.22		46.875	830.53						46.875	1742.3	46.875	1077.54							273.842	0.508394	1.96	-23.75	-18.438	-9.5313	-10	-6.0938	26.563	125.78	306.25	531.25	739.06	820.31
										47.4219	1707.91		47.4219	1453.74		47.4219	1114.32		47.4219	830.595						47.4219	1742.47	47.4219	1077.62							289.026	0.507973	1.965	-26.25	-21.25	-14.844	-8.2813	-5.3125	25.781	130.31	293.13	523.28	743.59	800.16
										47.9688	1708.26		47.9688	1453.94		47.9688	1114.41		47.9688	830.656						47.9688	1742.63	47.9688	1077.68							305.053	0.507562	1.97	-20.469	-19.063	-11.719	-14.375	-4.2188	28.281	131.09	300.47	526.56	725.16	794.53
										48.5156	1708.6		48.5156	1454.13		48.5156	1114.5		48.5156	830.712						48.5156	1742.78	48.5156	1077.74							321.968	0.50716	1.975	-18.594	-19.844	-12.656	-12.656	-2.9688	24.844	132.34	299.53	532.81	743.91	798.75
										49.0625	1708.91		49.0625	1454.31		49.0625	1114.58		49.0625	830.764						49.0625	1742.92	49.0625	1077.8							339.821	0.506767	1.98	-20	-17.969	-11.25	-13.594	-3.5938	31.406	139.22	310.31	533.28	733.44	804.38
										49.6094	1709.2		49.6094	1454.48		49.6094	1114.66		49.6094	830.813						49.6094	1743.05	49.6094	1077.86							358.664	0.506383	1.985	-23.906	-16.875	-16.563	-8.9063	-5	23.75	129.38	302.5	534.38	739.69	792.81
										50.1562	1709.48		50.1562	1454.63		50.1562	1114.73		50.1562	830.859						50.1562	1743.18	50.1562	1077.91							378.552	0.506008	1.99	-23.906	-19.219	-13.906	-8.2813	-1.875	23.438	143.75	300.63	520.78	733.13	794.06
										50.7031	1709.74		50.7031	1454.78		50.7031	1114.8		50.7031	830.901						50.7031	1743.29	50.7031	1077.95							399.542	0.505641	1.995	-22.5	-23.125	-12.5	-12.813	-5	25.313	135.78	305.94	514.38	745.94	807.03
										51.25	1709.98		51.25	1454.91		51.25	1114.86		51.25	830.94						51.25	1743.4	51.25	1078							421.697	0.505282	2	-20.625	-19.063	-12.813	-9.5313	-5.1563	24.531	130.63	308.44	520.94	735.78	811.41
										51.7969	1710.2		51.7969	1455.04		51.7969	1114.92		51.7969	830.977						51.7969	1743.5	51.7969	1078.04							445.079	0.504931	2.005	-23.125	-19.375	-12.969	-10.781	-4.2188	30.938	135	301.56	518.28	736.09	816.09
										52.3438	1710.41		52.3438	1455.16		52.3438	1114.97		52.3438	831.011						52.3438	1743.59	52.3438	1078.07							469.759	0.504588	2.01	-22.344	-14.844	-13.594	-12.813	-1.875	25.781	135.78	303.75	517.81	718.75	828.28
										52.8906	1710.61		52.8906	1455.27		52.8906	1115.02		52.8906	831.043						52.8906	1743.68	52.8906	1078.11							495.807	0.504253	2.015	-22.344	-15.469	-14.688	-10.156	-0.1563	29.844	136.56	293.59	511.72	759.38	821.72
										53.4375	1710.8		53.4375	1455.37		53.4375	1115.07		53.4375	831.072						53.4375	1743.76	53.4375	1078.14							523.299	0.503926	2.02	-20	-18.906	-13.594	-10	-0.7813	25.781	130	300.47	515.16	745.94	817.97
										53.9844	1710.97		53.9844	1455.47		53.9844	1115.11		53.9844	831.1						53.9844	1743.83	53.9844	1078.17							552.316	0.503606	2.025	-23.438	-19.531	-12.188	-8.75	-2.1875	20.313	134.84	306.56	518.91	737.5	824.84
										54.5312	1711.13		54.5312	1455.56		54.5312	1115.15		54.5312	831.125						54.5312	1743.9	54.5312	1078.2							582.942	0.503293	2.03	-22.5	-16.719	-15.156	-5.9375	-1.0938	24.688	129.84	303.59	522.19	739.53	805.31
										55.0781	1711.29		55.0781	1455.64		55.0781	1115.19		55.0781	831.149						55.0781	1743.97	55.0781	1078.23							615.265	0.502987	2.035	-20.313	-18.906	-11.563	-12.5	1.7188	28.906	128.91	299.69	517.19	750.94	831.88
										55.625	1711.43		55.625	1455.72		55.625	1115.23		55.625	831.171						55.625	1744.03	55.625	1078.25							649.382	0.502689	2.04	-24.063	-18.281	-11.875	-7.5	-4.0625	27.031	134.53	302.97	515.63	738.91	827.81
										56.1719	1711.56		56.1719	1455.79		56.1719	1115.26		56.1719	831.192						56.1719	1744.09	56.1719	1078.28							685.39	0.502397	2.045	-22.344	-19.844	-13.75	-12.813	-2.6563	27.969	141.56	300.31	525.16	746.09	831.72
										56.7188	1711.69		56.7188	1455.86		56.7188	1115.29		56.7188	831.211						56.7188	1744.14	56.7188	1078.3							723.394	0.502111	2.05	-22.344	-15.781	-13.75	-10.469	-5.625	26.25	143.28	307.97	540.16	754.06	824.22
										57.2656	1711.81		57.2656	1455.93		57.2656	1115.32		57.2656	831.229						57.2656	1744.19	57.2656	1078.32							763.506	0.501833	2.055	-24.219	-17.969	-13.75	-10.625	-4.5313	29.063	137.66	314.22	535.78	742.03	823.28
										57.8125	1711.92		57.8125	1455.99		57.8125	1115.34		57.8125	831.245						57.8125	1744.24	57.8125	1078.34							805.842	0.50156	2.06	-21.094	-22.031	-12.188	-6.4063	-6.25	27.344	142.34	306.72	541.56	726.56	827.19
										58.3594	1712.02		58.3594	1456.04		58.3594	1115.37		58.3594	831.261						58.3594	1744.28	58.3594	1078.35							850.526	0.501294	2.065	-26.094	-18.438	-13.594	-8.75	-4.6875	29.375	140	300	540	737.03	828.75
										58.9062	1712.12		58.9062	1456.09		58.9062	1115.39		58.9062	831.275						58.9062	1744.32	58.9062	1078.37							897.687	0.501034	2.07	-24.844	-17.188	-13.438	-12.031	-1.0938	25.156	144.38	299.53	531.09	738.13	819.38
										59.4531	1712.21		59.4531	1456.14		59.4531	1115.41		59.4531	831.288						59.4531	1744.36	59.4531	1078.39							947.464	0.50078	2.075	-25.625	-16.875	-16.25	-12.031	-6.5625	23.438	150.16	301.41	531.25	733.44	829.53
										60	1712.29		60	1456.19		60	1115.43		60	831.301						60	1744.4	60	1078.4							1000	0.500531	2.08	-22.5	-15.469	-15.469	-9.8438	-5	25.938	137.97	297.66	533.44	751.56	837.97
																																						2.085	-20.938	-17.656	-16.406	-10.781	-4.375	23.75	137.03	302.81	525.94	745.47	823.91
																																						2.09	-22.813	-14.063	-14.219	-12.5	-2.9688	25.781	138.28	307.81	535.47	760.47	798.13
																																						2.095	-19.844	-19.844	-13.281	-11.875	-2.5	28.75	143.44	300.78	543.13	749.84	788.13
																																						2.1	-20	-13.281	-15.469	-12.188	-4.375	27.344	139.53	302.19	552.5	763.28	811.09
																																						2.105	-26.563	-18.594	-11.875	-10.625	-9.2188	26.094	143.28	297.97	553.13	757.5	777.81
																																						2.11	-27.188	-15.469	-15.156	-9.2188	-2.6563	18.906	140.94	299.38	549.06	767.97	799.38
																																						2.115	-22.969	-19.219	-14.063	-10.781	-3.5938	25.469	144.69	308.13	551.56	766.72	795.47
																																						2.12	-22.344	-17.5	-12.344	-11.094	0.4688	23.125	146.56	320	544.22	767.5	808.13
																																						2.125	-23.281	-19.688	-12.5	-11.875	-2.3438	23.906	144.69	314.53	546.25	746.41	808.28
																																						2.13	-21.563	-15.469	-14.844	-12.344	-6.5625	27.656	142.19	312.66	552.97	746.88	802.66
																																						2.135	-24.844	-18.906	-13.594	-10.625	-3.75	30	129.84	310.16	556.88	745.31	805.16
																																						2.14	-21.563	-15	-17.031	-10.313	-5	28.125	135.94	315	556.09	740.78	808.28
																																						2.145	-22.656	-18.125	-12.813	-14.063	-6.875	31.094	134.22	309.22	557.97	742.03	812.19
																																						2.15	-20.625	-18.281	-11.094	-11.094	-5	25.781	141.25	319.69	558.28	751.25	815.94
																																						2.155	-20	-16.094	-16.563	-10	-2.3438	30.625	137.66	315.94	553.13	742.19	830.16
																																						2.16	-25.313	-16.094	-13.125	-7.3438	-7.5	28.906	146.25	318.91	548.75	740.47	806.56
																																						2.165	-23.594	-16.719	-14.688	-13.75	-5	27.188	136.25	314.53	552.81	740.47	816.72
																																						2.17	-22.813	-15.938	-16.25	-10.313	-0.625	25.156	133.75	313.13	551.09	747.03	806.88
																																						2.175	-22.969	-19.219	-15.781	-12.969	-8.125	30.625	145.94	326.09	529.06	740.47	817.34
																																						2.18	-19.219	-15.938	-11.563	-9.5313	-5.9375	25.156	142.81	325.78	549.38	727.34	796.88
																																						2.185	-22.188	-17.344	-14.219	-12.813	-0.625	29.688	133.59	325.94	552.5	747.66	793.28
																																						2.19	-19.375	-18.906	-9.0625	-13.438	-2.5	28.75	142.34	310.16	541.25	744.69	842.34
																																						2.195	-20	-20	-14.688	-10	-2.0313	25.781	148.28	313.28	552.19	744.06	822.34
																																						2.2	-21.719	-18.906	-15.156	-12.5	-5.9375	24.844	140.78	309.69	559.06	745.94	819.69
																																						2.205	-22.344	-17.969	-13.438	-12.5	-3.4375	26.563	141.72	308.44	560.78	733.75	818.91
																																						2.21	-22.656	-19.219	-11.406	-12.813	-5.625	23.75	143.75	319.38	571.72	739.69	832.34
																																						2.215	-24.063	-16.875	-15	-10.938	-5	26.25	140	317.03	558.59	730.16	834.06
																																						2.22	-22.813	-21.719	-12.188	-9.5313	-2.5	18.594	143.44	315.63	563.75	718.91	830.63
																																						2.225	-23.594	-18.125	-9.375	-12.031	-7.3438	24.063	150.78	326.88	547.5	732.97	827.66
																																						2.23	-22.5	-15.625	-14.063	-12.344	-3.125	26.094	147.19	323.91	541.25	746.09	821.56
																																						2.235	-20.625	-18.125	-11.25	-8.75	-2.8125	26.25	144.38	318.44	540.16	741.72	806.56
																																						2.24	-21.875	-16.719	-13.594	-11.719	-0.9375	22.656	146.25	311.41	536.72	743.91	783.13
																																						2.245	-21.094	-17.5	-17.031	-10.781	-1.25	26.406	150.47	310.16	554.84	751.72	786.88
																																						2.25	-23.125	-16.875	-13.906	-12.5	-5.4688	25.313	149.84	321.72	569.69	758.28	796.25
																																						2.255	-25	-18.75	-12.5	-10	-3.9063	26.719	141.09	312.34	569.22	749.06	801.56
																																						2.26	-22.5	-13.281	-14.219	-10.625	-3.125	24.844	142.5	329.84	577.19	749.38	787.5
																																						2.265	-25.469	-13.438	-12.969	-10.781	-2.5	28.438	147.5	324.69	566.72	753.59	783.44
																																						2.27	-23.281	-17.656	-11.719	-7.8125	-5.9375	23.438	143.44	327.81	560	749.84	775.78
																																						2.275	-24.375	-16.875	-14.688	-9.375	-2.3438	25.938	137.03	317.5	549.22	737.81	791.56
																																						2.28	-23.125	-13.594	-11.563	-13.125	-2.0313	31.875	141.88	317.34	558.91	738.28	815.47
																																						2.285	-21.406	-17.656	-11.563	-11.563	-1.5625	27.969	139.69	316.56	551.41	743.59	816.09
																																						2.29	-23.438	-17.031	-15	-11.406	-4.0625	28.281	136.41	324.53	557.81	738.75	814.84
																																						2.295	-26.094	-19.688	-12.5	-13.906	-2.5	30	135.31	318.91	558.28	736.09	811.25
																																						2.3	-24.375	-18.438	-13.438	-11.563	-4.375	30.469	145.47	332.19	561.88	750.94	806.56
																																						2.305	-26.25	-15.938	-10.781	-10.625	-6.875	33.75	142.97	326.25	574.53	749.84	807.5
																																						2.31	-26.563	-16.563	-14.688	-9.2188	-5	22.656	138.13	322.81	557.97	760.31	813.91
																																						2.315	-25.938	-16.094	-15.469	-11.25	-5.3125	24.375	142.5	339.84	552.81	760.47	808.75
																																						2.32	-24.688	-18.281	-12.813	-11.719	-4.6875	23.594	138.59	344.84	557.5	757.19	821.09
																																						2.325	-25.938	-17.656	-12.813	-13.281	-4.375	22.188	144.06	337.97	546.09	758.44	818.44
																																						2.33	-26.406	-17.969	-14.531	-10.625	0	25.156	143.13	327.34	559.06	759.06	821.25
																																						2.335	-23.438	-18.906	-14.063	-12.5	-0.1563	27.031	139.38	323.75	576.56	752.34	800.94
																																						2.34	-21.406	-16.875	-14.375	-13.906	-1.25	22.656	144.69	324.69	585.94	752.97	805.16
																																						2.345	-22.344	-18.438	-14.375	-12.5	-2.0313	31.719	146.09	337.19	580.31	742.34	805.63
																																						2.35	-25.469	-16.094	-14.375	-12.813	-3.4375	29.531	137.81	334.06	576.72	752.5	804.69
																																						2.355	-22.344	-16.719	-14.375	-10.625	-4.5313	28.594	144.69	327.03	578.44	756.56	806.72
																																						2.36	-21.875	-17.188	-12.813	-11.719	-4.2188	27.188	147.66	327.97	586.72	755.78	800.78
																																						2.365	-22.188	-17.5	-14.219	-10.781	-6.4063	28.906	138.59	321.09	577.19	743.28	811.41
																																						2.37	-25	-17.188	-14.531	-10.938	-2.5	27.969	142.81	332.66	591.56	747.34	819.84
																																						2.375	-20.781	-15.625	-14.531	-11.875	-3.125	27.969	139.53	326.41	589.84	762.66	800.47
																																						2.38	-22.344	-17.031	-14.219	-11.563	-3.4375	23.75	140.78	327.97	580.78	761.09	803.59
																																						2.385	-22.031	-17.969	-15.625	-9.0625	-4.375	23.125	133.75	328.13	579.06	771.41	797.81
																																						2.39	-21.25	-16.25	-18.594	-9.0625	-4.2188	21.719	140.16	338.13	570.47	768.28	810.78
																																						2.395	-20.938	-15.781	-14.844	-7.5	-1.0938	33.75	146.72	331.25	577.19	759.84	817.97
																																						2.4	-20	-14.688	-14.375	-10	-1.0938	30	140	324.06	577.97	766.09	810.47
																																						2.405	-24.219	-18.906	-16.094	-11.563	-3.125	29.844	141.72	333.44	590.47	781.09	817.5
																																						2.41	-24.219	-15.156	-10.313	-7.5	-7.8125	29.844	152.19	337.34	584.06	765.63	828.91
																																						2.415	-22.813	-16.25	-11.563	-11.25	-4.6875	30	147.19	338.28	594.84	777.5	800.78
																																						2.42	-24.219	-16.25	-13.594	-9.375	-5.7813	29.844	142.5	339.84	579.53	800.78	789.06
																																						2.425	-26.563	-17.5	-15.938	-10.313	-3.5938	30	141.25	340.31	580.31	790.94	794.38
																																						2.43	-23.125	-18.281	-14.688	-13.75	-7.1875	32.188	146.09	330	588.28	785.31	801.25
																																						2.435	-25.781	-17.813	-13.594	-6.7188	-0.7813	31.25	149.69	337.97	600.47	787.03	820.47
																																						2.44	-22.813	-17.5	-13.438	-10.156	-0.1563	30.625	146.56	323.28	585.47	790	790.47
																																						2.445	-22.188	-15.781	-13.125	-8.5938	-4.375	28.906	139.22	334.22	588.75	795.94	795.63
																																						2.45	-23.125	-15	-12.969	-7.9688	-3.2813	23.906	146.41	326.72	590.31	775.94	797.81
																																						2.455	-23.594	-15.625	-14.063	-11.875	-3.125	30.781	146.88	327.97	598.91	783.75	810
																																						2.46	-20.938	-18.594	-15.781	-10.625	-5.7813	28.594	145.47	334.38	596.56	782.81	796.09
																																						2.465	-26.719	-17.813	-12.813	-10.938	-3.2813	36.406	144.53	341.56	572.97	779.06	802.5
																																						2.47	-20.938	-15	-14.219	-9.6875	-5.625	31.719	148.59	344.84	583.59	767.34	801.72
																																						2.475	-22.5	-17.656	-13.438	-10.938	-1.0938	28.75	153.13	340.78	579.84	784.22	821.41
																																						2.48	-22.969	-16.875	-15.313	-9.5313	-3.4375	31.719	155	344.84	570	778.28	816.09
																																						2.485	-19.844	-16.875	-13.281	-8.125	-1.25	32.031	150.16	351.09	562.97	775.47	812.19
																																						2.49	-17.5	-16.406	-13.125	-12.5	-0.4688	27.656	154.06	352.97	571.41	805.31	794.84
																																						2.495	-20.469	-13.594	-14.219	-12.031	-5	29.375	149.53	343.28	579.22	806.56	814.38
																																						2.5	-20	-16.094	-11.719	-9.375	-1.7188	27.5	145.78	339.38	582.19	805.31	819.84
																																						2.505	-25.625	-18.438	-15.625	-10.938	-3.5938	29.219	146.56	345.47	598.91	785.47	816.09
																																						2.51	-23.906	-16.719	-14.844	-11.25	-5.9375	26.719	149.22	335.47	608.91	777.03	816.09
																																						2.515	-22.344	-16.875	-17.5	-10.625	-4.2188	31.875	153.13	333.59	597.5	778.28	810.16
																																						2.52	-25.625	-18.906	-10	-8.4375	-4.6875	30.625	150.16	341.25	600.94	770.47	803.13
																																						2.525	-23.281	-17.969	-12.344	-11.875	-5.3125	34.219	149.06	344.53	590	775.78	803.91
																																						2.53	-25.781	-17.188	-13.125	-13.281	1.25	27.813	143.44	342.34	615.78	775	790.47
																																						2.535	-23.906	-17.344	-12.656	-11.406	-3.125	27.656	148.28	347.81	606.72	777.34	809.53
																																						2.54	-22.813	-16.563	-13.125	-8.9063	-5	28.125	146.09	349.84	607.66	773.75	819.84
																																						2.545	-22.344	-20	-15.313	-12.5	-6.25	28.125	152.5	355	604.38	761.09	800.94
																																						2.55	-26.563	-19.219	-11.875	-10	-4.0625	33.281	155.16	347.66	609.69	773.28	795.31
																																						2.555	-26.25	-17.344	-13.906	-7.8125	-7.0313	31.875	156.88	349.06	588.28	785.47	805.31
																																						2.56	-17.813	-18.594	-12.969	-9.8438	-4.2188	28.906	151.72	347.5	589.84	774.38	799.22
																																						2.565	-25.781	-18.594	-12.813	-8.5938	-2.0313	35.313	162.03	336.41	576.09	774.69	810.78
																																						2.57	-21.094	-16.875	-14.844	-4.8438	-1.5625	29.219	157.5	344.69	589.22	779.38	812.81
																																						2.575	-23.125	-17.188	-10	-11.406	-4.0625	35	152.97	340.63	598.75	782.34	809.69
																																						2.58	-21.563	-15.781	-15.781	-11.406	-1.25	37.969	147.19	333.91	588.59	768.28	795.94
																																						2.585	-21.094	-18.438	-14.375	-12.813	-2.3438	29.375	145.78	341.25	598.59	785	804.84
																																						2.59	-22.656	-15.625	-13.906	-11.25	-0.7813	35	155.94	334.84	603.28	782.66	818.44
																																						2.595	-21.25	-17.5	-13.125	-13.438	-2.1875	31.875	159.69	331.72	598.91	798.44	802.03
																																						2.6	-23.125	-18.906	-14.531	-11.25	-2.1875	38.281	162.19	340.78	593.91	792.19	807.97
																																						2.605	-25.625	-19.688	-16.094	-10.156	-4.5313	32.656	162.19	339.84	604.06	795.47	835.31
																																						2.61	-21.563	-13.594	-15.625	-10.625	-8.4375	31.719	155.94	356.88	597.5	806.09	826.88
																																						2.615	-25	-15	-14.219	-11.719	-5	35.781	151.72	350.31	586.72	807.97	824.84
																																						2.62	-23.438	-19.844	-13.75	-12.031	-5.625	29.531	159.69	351.56	594.84	799.38	810.16
																																						2.625	-26.094	-22.031	-13.125	-8.4375	-5.625	32.656	150.31	353.91	588.13	793.59	784.69
																																						2.63	-21.25	-18.906	-16.406	-9.0625	-4.2188	32.344	151.56	353.91	605.94	787.5	814.69
																																						2.635	-24.375	-18.438	-16.406	-7.5	-3.125	33.906	148.91	354.69	598.91	792.81	821.72
																																						2.64	-23.438	-16.094	-15	-10.938	-2.5	29.531	154.69	352.03	601.09	785.16	824.38
																																						2.645	-23.281	-20	-19.063	-15.625	-1.25	37.031	150.78	358.44	620.31	778.91	817.03
																																						2.65	-21.094	-17.813	-17.188	-7.5	-3.5938	38.125	149.53	350.78	612.97	785.31	824.38
																																						2.655	-24.531	-18.125	-14.375	-10	-1.25	36.406	157.19	354.53	608.13	788.91	818.59
																																						2.66	-21.563	-14.063	-13.438	-11.25	-4.375	30.469	153.75	354.69	595.16	797.19	822.66
																																						2.665	-23.125	-17.344	-15.156	-8.4375	-5.625	33.594	155.78	361.25	600	779.22	823.59
																																						2.67	-24.844	-17.656	-16.406	-8.75	-2.5	30.781	159.84	359.06	614.22	772.81	814.69
																																						2.675	-20.625	-17.031	-16.25	-9.6875	-7.0313	32.5	160.78	360.16	611.41	782.34	824.53
																																						2.68	-24.375	-18.75	-15.313	-13.594	-5	33.75	157.03	357.97	614.06	786.88	808.91
																																						2.685	-26.094	-20.781	-14.844	-9.375	-3.2813	31.094	150.47	365.16	623.44	791.09	799.22
																																						2.69	-18.906	-17.188	-14.844	-10	-4.8438	28.438	159.84	369.06	604.22	791.56	817.81
																																						2.695	-24.844	-17.344	-14.844	-13.75	-5.7813	32.031	161.72	364.22	615.63	788.59	812.34
																																						2.7	-22.969	-15.156	-15.469	-11.406	-5	28.438	160.31	361.41	600.94	796.72	784.53
																																						2.705	-23.125	-16.406	-9.6875	-12.031	-5.1563	25.938	160.31	350	615.31	809.84	793.28
																																						2.71	-25.469	-15.781	-13.125	-11.719	-6.0938	28.594	159.22	354.38	599.53	806.41	811.72
																																						2.715	-22.5	-13.438	-12.813	-10.938	-3.9063	31.719	157.97	348.59	604.53	802.03	799.06
																																						2.72	-22.344	-17.656	-10.781	-9.0625	-4.6875	31.719	163.75	348.44	595.94	790.16	807.03
																																						2.725	-23.281	-19.688	-13.594	-12.813	-9.375	31.875	164.53	354.69	606.72	794.69	803.75
																																						2.73	-26.25	-15.625	-13.281	-12.5	-5.625	34.219	158.28	340.94	608.75	789.69	791.88
																																						2.735	-24.688	-20	-11.875	-10.469	-2.8125	34.531	159.69	348.91	605.31	809.53	800.16
																																						2.74	-19.688	-14.219	-12.5	-10.938	-2.6563	33.594	160.94	350.16	599.22	799.69	799.69
																																						2.745	-24.844	-18.125	-18.438	-11.25	-3.9063	34.375	169.22	354.38	597.81	797.34	816.25
																																						2.75	-21.719	-14.219	-14.375	-12.188	-4.0625	26.094	165.31	357.5	604.53	799.53	810.78
																																						2.755	-24.375	-14.063	-12.031	-11.094	-0.7813	29.688	168.59	361.72	615.63	801.88	793.59
																																						2.76	-20.469	-18.906	-11.25	-12.344	-6.25	35.313	159.84	375	592.19	811.25	807.03
																																						2.765	-23.594	-18.438	-15.156	-11.875	-3.9063	29.844	160.16	363.28	592.5	805.16	791.72
																																						2.77	-23.438	-20.313	-12.5	-6.4063	2.0313	28.906	160.63	363.75	617.34	787.34	803.44
																																						2.775	-23.438	-18.906	-13.438	-11.406	-2.8125	27.031	160.31	365.94	598.28	803.44	804.84
																																						2.78	-23.125	-17.969	-14.688	-7.6563	-5	33.75	160.63	360.47	620.16	796.72	806.09
																																						2.785	-23.281	-18.75	-14.063	-11.094	-4.0625	37.188	164.06	369.38	625.16	789.06	827.34
																																						2.79	-23.594	-15.313	-15.469	-11.563	-1.25	29.063	154.84	373.44	626.56	788.44	830.78
																																						2.795	-26.719	-16.094	-16.406	-13.906	-3.9063	33.594	153.28	356.09	611.72	782.19	817.19
																																						2.8	-22.813	-16.719	-13.281	-10	-7.6563	36.094	159.84	357.34	615.94	772.34	833.44
																																						2.805	-23.438	-16.875	-16.406	-9.5313	-2.5	36.719	164.06	363.13	610.47	788.28	829.69
																																						2.81	-21.25	-14.063	-13.438	-13.906	-6.5625	33.125	166.09	358.13	600.47	781.25	813.28
																																						2.815	-25.156	-17.031	-12.656	-10.938	-2.5	32.969	155.63	353.44	601.41	791.25	812.97
																																						2.82	-24.219	-15.938	-13.438	-8.5938	-5.1563	35.156	155.31	355.47	618.44	788.13	797.34
																																						2.825	-19.219	-17.031	-11.25	-10.938	-6.5625	35.313	161.72	353.59	609.22	782.66	802.34
																																						2.83	-23.281	-13.125	-10.313	-10.625	-2.3438	38.281	155.63	360.47	602.66	774.06	803.44
																																						2.835	-21.094	-17.5	-16.406	-12.031	-0.4688	34.688	164.84	359.06	616.41	787.19	822.19
																																						2.84	-19.531	-14.375	-13.438	-12.031	-3.125	32.5	157.97	362.34	610	799.84	822.81
																																						2.845	-22.188	-15.625	-13.906	-11.406	-5.3125	36.406	160.31	365.31	603.13	809.84	817.66
																																						2.85	-24.844	-15.781	-16.094	-12.344	-2.9688	33.125	163.44	378.28	605.47	798.28	825.16
																																						2.855	-25.313	-15.469	-12.344	-15.625	-3.75	33.281	166.72	366.09	617.66	807.03	818.75
																																						2.86	-20.938	-15.938	-16.875	-10.625	-5.625	33.906	174.69	369.53	614.38	808.59	842.19
																																						2.865	-25.625	-14.531	-14.063	-13.906	-4.8438	35.156	164.84	369.38	621.09	804.22	843.75
																																						2.87	-21.25	-17.5	-13.906	-11.875	-4.8438	34.531	170.63	375.16	618.75	798.91	842.66
																																						2.875	-22.188	-14.531	-14.531	-10.313	-7.5	33.438	168.28	392.66	627.81	788.13	820.47
																																						2.88	-25.313	-16.719	-17.5	-12.656	-7.6563	35.625	156.56	388.91	615.16	783.75	834.22
																																						2.885	-23.594	-16.719	-9.8438	-10.469	-3.5938	29.688	155.31	381.88	619.53	797.34	855.47
																																						2.89	-20.625	-13.281	-15.781	-10.625	-8.5938	31.719	164.06	386.56	628.75	806.09	848.44
																																						2.895	-21.25	-15.938	-16.719	-13.594	-5.7813	34.375	164.06	381.72	629.69	787.5	847.81
																																						2.9	-24.375	-13.125	-13.906	-10.625	-3.125	33.125	164.69	391.09	620.31	791.56	837.34
																																						2.905	-24.531	-15	-14.531	-12.969	-5.4688	36.563	164.84	385.94	612.34	783.13	843.13
																																						2.91	-24.219	-15.156	-15.781	-9.6875	-6.875	33.75	165.94	377.19	631.88	794.38	812.5
																																						2.915	-24.219	-16.094	-16.875	-9.0625	-4.8438	32.969	163.44	371.88	641.41	789.38	818.75
																																						2.92	-25.313	-16.094	-14.219	-14.063	-6.4063	33.594	168.59	371.25	631.88	784.38	820.31
																																						2.925	-21.094	-17.344	-12.344	-12.656	-3.5938	30.313	157.81	373.28	624.06	787.81	815.16
																																						2.93	-24.688	-17.031	-10.938	-12.813	-5.625	32.344	157.03	368.59	626.56	797.97	817.5
																																						2.935	-23.906	-17.969	-14.219	-11.875	-3.9063	33.281	156.41	363.28	635.63	795.47	804.84
																																						2.94	-23.906	-17.188	-12.5	-12.344	-5	29.375	153.59	372.34	629.38	810.31	810.78
																																						2.945	-23.75	-18.594	-12.813	-10.313	-4.2188	32.188	160.63	391.41	638.91	812.5	816.41
																																						2.95	-28.438	-13.438	-16.25	-11.563	-2.5	31.094	164.53	381.88	638.91	790.94	819.38
																																						2.955	-25	-19.219	-16.094	-8.4375	-0.7813	32.5	163.28	367.97	633.75	790.47	807.97
																																						2.96	-21.25	-13.906	-13.125	-11.875	-3.4375	29.063	171.56	373.91	636.25	794.53	824.84
																																						2.965	-23.125	-17.031	-13.906	-14.531	-0.4688	33.594	163.44	384.38	637.5	782.19	831.56
																																						2.97	-21.875	-17.031	-12.344	-13.125	-1.875	30.938	164.06	387.97	638.28	780.63	836.25
																																						2.975	-25	-17.344	-16.094	-13.75	-2.0313	32.344	164.06	390.16	642.81	795.16	819.84
																																						2.98	-20.469	-15.625	-12.5	-10.781	-4.8438	33.125	160.94	375.16	644.84	803.13	810.16
																																						2.985	-27.813	-18.906	-12.5	-11.406	-1.25	34.063	167.66	383.75	643.28	807.97	793.44
																																						2.99	-21.719	-18.906	-10	-10.938	-4.6875	33.438	169.69	381.56	655.16	811.09	798.44
																																						2.995	-22.5	-19.219	-16.563	-14.531	-0.3125	31.25	161.72	377.5	644.84	785	804.06
																																						3	-19.375	-15.469	-14.531	-13.281	-9.375	32.656	169.38	381.88	642.66	784.69	808.28
																																						3.005	-21.563	-16.563	-12.344	-13.438	-6.4063	32.813	172.03	385.78	631.41	788.91	803.91
																																						3.01	-19.531	-17.656	-14.531	-11.719	-5	33.438	170.78	384.84	625.78	792.81	823.91
																																						3.015	-25.625	-16.094	-13.438	-12.5	0.7813	33.594	168.44	374.38	629.69	805.16	807.19
																																						3.02	-23.125	-16.563	-13.906	-8.9063	-7.0313	35	173.59	371.72	627.81	790.47	818.13
																																						3.025	-23.125	-19.844	-15.313	-9.6875	-5.3125	30.469	172.34	378.91	638.44	789.38	841.72
																																						3.03	-23.438	-21.25	-10.938	-8.75	-3.9063	37.031	160.78	374.38	627.97	806.88	818.59
																																						3.035	-19.688	-18.281	-12.813	-10.313	-4.6875	37.813	165.78	361.72	648.28	800.47	813.28
																																						3.04	-21.094	-18.594	-11.875	-11.563	-5.9375	29.531	169.53	377.03	638.13	813.91	813.75
																																						3.045	-23.125	-17.813	-13.281	-14.063	-3.5938	32.813	170.63	357.97	637.81	801.09	812.34
																																						3.05	-23.75	-17.031	-13.281	-11.719	-0.9375	33.75	171.41	371.88	637.34	813.91	823.59
																																						3.055	-24.219	-19.063	-13.438	-13.281	-3.9063	37.188	169.38	375.16	646.09	800.78	811.09
																																						3.06	-24.688	-14.531	-14.844	-11.875	-5.9375	39.375	172.34	366.41	630.31	797.19	801.09
																																						3.065	-27.813	-17.031	-14.219	-12.656	-0.1563	40.469	165.78	367.34	626.09	777.97	797.19
																																						3.07	-26.406	-17.656	-15.938	-9.2188	-5.3125	35.781	177.81	380.31	627.03	801.88	797.19
																																						3.075	-29.844	-19.375	-13.125	-11.719	-7.1875	39.375	165.31	384.38	638.75	802.19	787.66
																																						3.08	-25.469	-17.813	-14.844	-12.5	-4.6875	33.594	172.81	380.31	638.13	813.13	805.63
																																						3.085	-24.688	-20.469	-14.219	-10.625	-1.0938	32.656	169.69	373.75	652.34	811.25	814.22
																																						3.09	-21.875	-15.781	-12.031	-10.938	-3.5938	31.094	176.25	384.53	646.88	809.69	800.94
																																						3.095	-22.188	-18.125	-11.25	-12.656	-1.7188	32.031	171.09	375.94	647.19	807.34	814.38
																																						3.1	-21.563	-15.625	-13.125	-12.813	1.0938	35.313	169.22	388.75	657.19	793.59	810
																																						3.105	-23.438	-19.063	-14.844	-11.094	-2.1875	35.938	174.22	375.63	655.31	797.81	798.13
																																						3.11	-22.344	-15.156	-14.219	-14.531	-5.9375	37.813	173.28	396.56	652.19	822.34	781.41
																																						3.115	-24.531	-17.031	-12.656	-11.25	-4.0625	35.313	174.53	396.09	670	824.22	798.75
																																						3.12	-25	-14.063	-14.219	-11.563	-7.5	40.469	166.72	388.91	637.5	825.63	826.09
																																						3.125	-24.063	-18.281	-13.906	-12.031	-5.625	34.844	172.03	387.03	635.16	825	817.66
																																						3.13	-21.25	-16.719	-11.875	-10.625	-1.5625	37.344	166.25	397.5	637.19	802.03	797.5
																																						3.135	-22.813	-17.188	-15.625	-11.875	-1.7188	31.875	162.19	401.41	647.81	808.59	828.59
																																						3.14	-21.25	-19.531	-11.875	-14.531	-2.5	38.75	159.06	395.63	661.56	812.5	815.63
																																						3.145	-24.063	-19.375	-13.125	-15.469	-1.25	34.688	168.59	383.44	654.06	802.19	799.38
																																						3.15	-22.031	-16.094	-12.813	-11.25	0.3125	31.563	165.31	392.66	662.81	802.19	811.41
																																						3.155	-26.875	-14.688	-14.375	-14.688	-6.0938	33.906	174.38	386.72	647.5	802.5	802.34
																																						3.16	-23.594	-17.656	-13.594	-11.406	-4.6875	34.844	172.03	399.69	658.44	798.75	809.38
																																						3.165	-24.688	-20	-12.813	-14.063	-3.9063	36.563	179.53	395.47	652.66	812.97	785.63
																																						3.17	-25.781	-18.906	-14.063	-8.75	-7.5	32.031	173.59	407.66	642.81	825.78	789.84
																																						3.175	-23.125	-12.813	-16.094	-16.094	-5	35.313	174.69	405.16	625.16	809.22	802.97
																																						3.18	-22.813	-15	-15.625	-13.281	-2.5	39.844	178.13	400.63	639.69	802.81	797.5
																																						3.185	-24.063	-18.906	-14.375	-10.938	-2.3438	37.656	172.34	397.19	648.13	798.44	788.59
																																						3.19	-23.438	-17.344	-13.594	-17.344	-2.1875	37.813	173.13	399.06	645.16	818.59	813.13
																																						3.195	-20.781	-16.875	-17.5	-12.813	-3.125	38.281	174.38	386.88	632.66	811.56	813.75
																																						3.2	-20	-17.969	-16.875	-11.563	-1.5625	36.094	166.88	387.19	638.91	828.91	814.38
																																						3.205	-27.031	-21.406	-14.688	-12.969	-4.6875	37.031	169.69	387.97	662.34	837.81	820.31
																																						3.21	-21.875	-17.969	-15.313	-9.6875	-5.625	37.5	176.56	382.81	645.94	810.78	810.47
																																						3.215	-25.781	-19.063	-13.281	-10	-5.625	35.938	167.34	391.88	645.31	788.59	794.53
																																						3.22	-24.375	-19.844	-12.188	-10.781	-0.9375	35.313	171.09	395.63	642.97	796.72	817.19
																																						3.225	-24.688	-18.594	-10.469	-12.344	-5.7813	40.625	174.22	390.78	653.75	794.38	809.84
																																						3.23	-22.031	-17.813	-12.188	-12.656	-3.75	41.094	174.06	394.53	651.25	806.88	809.84
																																						3.235	-22.656	-20.781	-12.656	-13.75	-0.4688	37.344	174.38	398.44	655.16	808.44	812.5
																																						3.24	-22.188	-18.281	-14.688	-11.25	-4.5313	34.375	176.56	393.91	646.72	815.47	802.97
																																						3.245	-21.875	-20.625	-14.531	-15.313	-1.25	37.188	168.59	395.63	643.44	813.28	799.22
																																						3.25	-24.375	-18.438	-17.5	-13.594	-0.1563	39.219	182.34	401.72	646.72	818.28	776.41
																																						3.255	-24.844	-19.531	-16.25	-13.125	-2.1875	39.375	180.63	389.53	663.75	821.41	792.81
																																						3.26	-22.656	-15.469	-15.156	-12.188	-2.6563	36.094	180.31	390.31	659.06	818.59	809.53
																																						3.265	-22.031	-16.875	-13.281	-15.313	-2.5	35.625	175.31	402.19	646.09	816.25	807.03
																																						3.27	-22.344	-17.031	-13.281	-11.25	-4.0625	38.906	175.78	389.84	643.28	825.16	804.53
																																						3.275	-22.188	-12.969	-15	-12.188	-1.7188	37.344	177.66	389.38	652.34	807.81	810.16
																																						3.28	-19.219	-14.063	-14.219	-15.938	-7.5	39.063	182.03	410.31	661.41	812.03	808.91
																																						3.285	-25.781	-17.031	-14.688	-16.719	-2.0313	40.781	172.66	407.66	649.38	803.28	820.47
																																						3.29	-21.406	-16.25	-15.313	-9.375	-7.0313	35.625	171.25	408.28	639.06	832.03	813.28
																																						3.295	-23.438	-18.75	-15.938	-14.688	-5	37.969	180	405.63	653.44	831.25	783.44
																																						3.3	-22.813	-16.563	-14.063	-12.5	-6.25	39.375	185.94	408.28	661.09	808.59	819.22
																																						3.305	-20.313	-15.313	-16.875	-13.594	-1.0938	34.844	176.09	400.63	641.09	820.78	802.97
																																						3.31	-23.75	-15.313	-15.938	-13.125	-6.25	38.75	184.06	422.34	657.97	809.69	789.69
																																						3.315	-22.969	-18.125	-12.5	-10.156	-2.9688	36.719	171.09	411.09	660.31	798.44	812.34
																																						3.32	-20.781	-15.625	-15.625	-12.656	-1.5625	41.875	178.28	410.16	645.63	794.38	807.03
																																						3.325	-20	-17.969	-12.5	-15.156	-2.6563	40.313	180.16	412.19	647.66	831.41	794.22
																																						3.33	-21.406	-14.063	-17.031	-13.906	-2.1875	44.375	176.09	402.81	653.28	824.22	801.56
																																						3.335	-20	-17.5	-14.844	-18.594	-2.5	36.094	178.59	400.78	648.91	814.38	780.94
																																						3.34	-20	-15.781	-14.063	-12.031	-5.3125	39.688	184.38	414.06	656.41	804.22	797.34
																																						3.345	-18.75	-15.781	-16.406	-12.5	-2.8125	40.469	179.84	402.81	649.53	801.25	789.53
																																						3.35	-22.5	-17.344	-13.125	-15.156	-4.5313	42.344	196.56	421.72	656.09	809.53	799.84
																																						3.355	-21.719	-15.625	-13.281	-12.031	-8.4375	37.656	172.97	419.84	674.22	814.69	795.63
																																						3.36	-23.75	-15.469	-11.719	-12.188	-5.4688	39.688	175.63	420.78	649.84	804.53	811.25
																																						3.365	-23.594	-19.531	-15.313	-13.438	-5	38.125	177.66	415.63	673.91	806.09	783.91
																																						3.37	-24.531	-18.906	-12.5	-10.469	-5.625	42.656	181.88	408.59	678.28	811.41	774.84
																																						3.375	-22.344	-17.188	-13.438	-11.563	-6.7188	34.375	180.94	413.59	663.75	816.09	780.78
																																						3.38	-22.344	-18.281	-11.875	-11.563	-3.2813	39.375	171.56	407.81	665	798.91	787.5
																																						3.385	-26.719	-19.844	-14.375	-11.25	-4.8438	44.688	183.28	405.94	652.34	821.25	805.94
																																						3.39	-19.375	-17.656	-14.531	-14.688	-5.3125	39.688	187.19	414.38	662.5	814.69	807.97
																																						3.395	-22.813	-16.563	-17.031	-10.625	-1.7188	48.281	179.84	402.19	663.75	802.5	809.84
																																						3.4	-21.875	-15.313	-11.719	-9.8438	-2.0313	41.094	177.19	394.69	679.84	791.72	821.41
																																						3.405	-23.594	-18.281	-16.406	-15.156	-3.5938	40.313	181.88	404.84	673.44	812.66	808.75
																																						3.41	-22.969	-15.781	-12.969	-8.2813	-4.0625	38.75	182.19	411.56	668.59	800.78	819.69
																																						3.415	-23.125	-17.188	-15.156	-12.969	-3.2813	39.688	181.72	400.63	664.06	801.88	819.06
																																						3.42	-24.531	-16.094	-11.875	-12.5	-2.6563	41.719	183.44	414.69	654.84	818.44	811.56
																																						3.425	-21.25	-15.313	-13.594	-12.656	-3.75	45	184.69	415.63	650.31	802.19	795.63
																																						3.43	-25.781	-13.75	-16.094	-13.75	-1.875	40.938	182.5	420.94	665.16	806.41	799.84
																																						3.435	-26.25	-15.469	-13.438	-14.219	-7.3438	38.281	180.16	401.09	669.38	812.19	815.63
																																						3.44	-19.531	-19.688	-13.906	-10.781	-4.6875	32.344	183.44	411.09	660.47	804.84	819.22
																																						3.445	-22.188	-16.406	-16.875	-14.219	-10.938	36.094	185.78	402.03	660.47	796.09	800.63
																																						3.45	-23.438	-15.156	-12.031	-14.688	-2.3438	40.156	189.38	405.16	671.72	811.09	811.72
																																						3.455	-24.688	-16.719	-12.656	-10	-3.2813	33.125	190	411.88	662.97	813.28	819.69
																																						3.46	-22.031	-16.719	-8.75	-7.6563	-6.25	37.656	188.75	409.53	666.88	820.78	812.66
																																						3.465	-20.938	-16.25	-15.469	-12.656	-4.6875	34.688	184.38	408.13	660.47	811.41	797.81
																																						3.47	-21.094	-15.625	-15	-13.125	-0.9375	39.531	180.63	408.44	658.44	814.06	809.38
																																						3.475	-19.219	-14.219	-13.594	-12.5	-6.25	37.188	182.34	404.69	652.81	831.56	806.56
																																						3.48	-19.844	-17.969	-14.219	-12.031	-3.2813	43.906	180.31	420	652.03	820.78	819.06
																																						3.485	-19.375	-17.813	-13.438	-13.75	-2.0313	43.438	188.59	413.28	657.97	817.81	802.81
																																						3.49	-22.344	-17.5	-12.656	-12.344	-6.4063	45.625	191.56	407.03	662.81	813.59	797.97
																																						3.495	-21.563	-20	-17.188	-15.156	-4.2188	41.719	191.09	395.78	669.69	827.97	797.66
																																						3.5	-22.031	-18.125	-13.594	-12.188	-3.4375	44.219	184.53	398.13	666.09	839.69	809.84
																																						3.505	-20.938	-17.656	-14.531	-13.125	-3.125	39.688	182.19	411.56	652.66	826.88	793.91
																																						3.51	-22.813	-17.813	-10.625	-13.281	-4.375	47.813	179.84	426.25	666.09	822.81	806.09
																																						3.515	-22.031	-18.906	-14.844	-13.281	-2.9688	49.688	190.47	417.5	670.31	824.53	811.88
																																						3.52	-20.469	-17.813	-14.219	-10.781	-1.5625	44.375	188.75	412.97	680.31	822.19	818.75
																																						3.525	-23.75	-13.281	-12.031	-11.719	-3.75	40.781	184.22	402.5	683.59	823.59	810.78
																																						3.53	-22.031	-12.656	-11.25	-13.906	-2.6563	47.969	191.88	416.56	667.19	832.97	809.53
																																						3.535	-24.063	-15.313	-13.125	-14.844	-2.9688	41.563	185.31	413.28	665.31	839.38	791.72
																																						3.54	-25.781	-14.063	-15	-10.781	-5	39.531	180.16	409.69	647.5	835.78	799.69
																																						3.545	-20.625	-16.25	-15	-13.75	-4.8438	43.75	199.06	401.09	670.63	817.03	796.41
																																						3.55	-25	-15.313	-18.594	-11.25	-3.9063	46.875	187.03	406.88	666.72	815.31	803.91
																																						3.555	-27.656	-17.969	-13.75	-11.719	-4.0625	47.188	185.94	406.88	655.47	821.25	799.06
																																						3.56	-23.594	-17.344	-12.344	-11.563	-2.5	46.094	182.97	411.56	666.41	805.78	814.53
																																						3.565	-26.875	-16.875	-12.5	-12.5	-3.2813	43.281	182.66	402.81	674.53	831.72	812.97
																																						3.57	-22.656	-17.5	-12.969	-13.281	1.25	42.344	194.69	415.47	675.47	819.84	811.72
																																						3.575	-27.656	-17.031	-15.469	-13.906	-3.125	39.063	192.03	415.78	677.81	819.84	796.41
																																						3.58	-23.594	-16.406	-10	-13.906	0.7813	46.094	180.63	417.19	673.59	812.5	815.47
																																						3.585	-23.594	-14.063	-14.375	-12.969	-3.9063	50.625	186.09	418.59	670.16	810.63	818.91
																																						3.59	-25	-15	-14.219	-11.875	-8.125	40.781	195.31	424.06	682.97	821.88	816.72
																																						3.595	-17.5	-18.438	-15.156	-12.031	-5.625	46.563	185.47	429.06	686.41	822.97	801.41
																																						3.6	-24.688	-18.594	-16.719	-15.156	-2.5	47.5	179.84	420.47	677.19	835	810.31
																																						3.605	-24.375	-17.5	-13.281	-16.406	-5	45.781	191.72	414.84	665.94	821.25	802.03
																																						3.61	-18.281	-17.188	-10.781	-14.688	-1.5625	40.938	185.31	411.25	680.94	821.25	813.13
																																						3.615	-24.688	-13.594	-14.219	-9.8438	-3.2813	43.438	190.78	408.91	682.97	814.38	788.44
																																						3.62	-23.438	-17.813	-11.719	-10.313	-2.1875	40.469	179.84	415.31	695.63	812.19	795.63
																																						3.625	-23.594	-14.375	-14.844	-12.188	-2.0313	40.469	192.03	402.97	702.34	819.69	777.81
																																						3.63	-24.375	-20	-13.594	-13.906	-3.125	45.156	197.66	401.56	690.47	817.5	783.75
																																						3.635	-25.156	-16.875	-14.531	-8.75	-5.625	45.781	191.56	409.38	680.31	822.81	789.38
																																						3.64	-22.969	-19.375	-15.781	-14.219	-5.7813	41.875	194.38	409.38	665.31	810.78	778.28
																																						3.645	-21.25	-19.375	-18.906	-15.313	-4.2188	45.469	196.88	404.53	686.09	819.38	786.72
																																						3.65	-26.406	-16.406	-15.938	-14.844	-2.5	43.594	191.88	406.09	678.13	822.03	812.66
																																						3.655	-21.094	-16.25	-16.25	-11.719	-3.75	46.563	188.44	399.22	662.03	799.84	819.53
																																						3.66	-23.75	-21.563	-13.75	-11.719	-1.0938	45	190.47	406.56	663.44	803.28	813.59
																																						3.665	-22.5	-19.375	-16.719	-10.313	-5.3125	45.469	187.81	419.53	670.31	823.44	792.97
																																						3.67	-24.688	-16.25	-10.156	-11.406	-3.5938	39.063	189.06	419.38	681.25	825.31	791.56
																																						3.675	-22.813	-16.406	-12.5	-10	-1.0938	44.688	190.94	409.69	677.97	825.31	788.91
																																						3.68	-24.844	-16.875	-12.344	-13.75	-5.1563	44.688	196.41	417.81	666.09	819.53	797.5
																																						3.685	-27.344	-16.875	-12.656	-10.625	-9.5313	43.906	185.94	420.94	661.25	825.94	805.47
																																						3.69	-21.094	-18.281	-16.875	-10.625	-4.0625	42.969	185.94	413.13	670.16	844.06	806.41
																																						3.695	-25.469	-20.469	-15.313	-13.906	-3.75	45.313	188.13	418.13	662.19	852.03	790.94
																																						3.7	-24.063	-17.188	-11.875	-12.5	-2.8125	41.094	198.59	396.72	690.47	840.94	797.5
																																						3.705	-27.656	-17.344	-12.5	-12.813	-3.125	42.813	191.56	415.31	676.41	843.13	830.47
																																						3.71	-24.531	-17.344	-16.406	-12.031	-5.9375	34.063	186.09	417.34	686.25	842.19	827.5
																																						3.715	-22.344	-17.5	-13.906	-13.125	-5.1563	40.313	187.81	413.91	679.06	845	821.88
																																						3.72	-23.75	-19.063	-10.469	-11.406	-2.6563	42.5	188.28	410.47	693.13	837.5	815.63
																																						3.725	-21.719	-17.188	-10.469	-10.938	-3.9063	40.625	183.75	404.06	691.88	823.13	819.38
																																						3.73	-24.219	-20	-13.594	-10.938	-1.25	41.094	182.03	413.28	694.84	831.25	819.38
																																						3.735	-22.969	-20	-11.563	-10.469	-1.5625	44.844	192.5	406.56	682.97	835.78	798.91
																																						3.74	-23.906	-18.906	-13.594	-13.594	-4.0625	39.688	188.44	399.06	690.47	847.5	804.69
																																						3.745	-19.063	-16.719	-11.25	-11.563	-2.3438	46.25	183.13	410.47	679.22	831.41	806.72
																																						3.75	-22.031	-16.719	-12.5	-11.875	-2.8125	48.75	185.94	416.88	672.66	864.06	817.66
																																						3.755	-22.188	-15.938	-13.281	-13.125	-3.5938	43.125	192.34	401.56	668.59	858.91	828.28
																																						3.76	-22.969	-17.656	-9.375	-12.031	-5.625	49.063	187.66	413.44	669.84	828.59	809.53
																																						3.765	-22.031	-14.375	-10	-8.9063	-1.5625	42.813	184.84	421.72	691.09	809.84	812.19
																																						3.77	-20	-17.5	-13.125	-8.125	-4.2188	45.625	184.53	424.22	683.44	819.69	814.38
																																						3.775	-24.375	-20.781	-12.969	-10.625	-2.0313	45.938	197.5	427.34	685.31	819.69	810.47
																																						3.78	-22.5	-18.75	-12.188	-11.406	-4.8438	50.313	185.78	431.09	704.53	816.56	790.31
																																						3.785	-22.5	-18.75	-13.125	-11.719	-2.1875	47.969	182.81	427.97	690.31	830.94	775.16
																																						3.79	-22.031	-18.438	-13.594	-12.969	-8.5938	44.219	193.44	426.88	679.06	831.56	784.22
																																						3.795	-20.938	-19.219	-12.813	-13.75	-4.6875	45.625	195.94	422.81	687.81	831.88	799.38
																																						3.8	-20.625	-16.719	-15.156	-14.531	-1.0938	44.531	191.72	411.56	687.19	821.41	803.44
																																						3.805	-26.094	-20.625	-13.125	-14.531	-2.1875	47.344	187.34	406.09	679.84	839.84	808.28
																																						3.81	-25	-21.563	-9.8438	-12.813	-1.25	49.375	193.28	417.19	677.81	818.91	803.28
																																						3.815	-20	-20.469	-13.438	-10	-0.4688	45.781	187.03	415.63	678.13	809.69	786.88
																																						3.82	-23.906	-18.594	-9.8438	-10.313	-4.375	47.656	192.97	415.47	682.66	824.84	805.63
																																						3.825	-21.094	-17.188	-13.906	-9.5313	0.625	44.688	187.34	413.91	694.84	819.06	781.41
																																						3.83	-20	-17.5	-15	-9.6875	-0.1563	46.719	192.97	403.75	705.16	826.88	787.66
																																						3.835	-22.031	-16.563	-12.5	-13.594	-3.4375	40.625	175.94	412.97	697.97	832.19	794.69
																																						3.84	-21.094	-17.188	-13.906	-12.813	0.625	42.969	189.69	414.22	692.5	835.94	791.72
																																						3.845	-18.906	-18.281	-12.5	-8.75	-5.625	43.75	185.47	415.31	681.25	849.69	799.53
																																						3.85	-25	-17.656	-14.844	-10.469	-3.5938	41.406	190.94	425.16	689.38	841.09	810.31
																																						3.855	-27.344	-16.094	-12.5	-10.781	-2.5	42.188	194.69	416.56	689.69	819.38	817.03
																																						3.86	-23.281	-17.344	-15.313	-10.781	-7.3438	39.844	192.97	410.63	685.78	825.63	799.38
																																						3.865	-24.219	-15.469	-10	-11.25	-2.1875	40.625	195.78	428.13	686.72	830.16	815.94
																																						3.87	-22.5	-17.188	-11.875	-12.969	-4.2188	43.75	192.97	429.69	704.69	829.22	816.72
																																						3.875	-25.156	-17.813	-11.406	-14.063	-1.25	40.156	194.38	419.84	702.19	832.03	811.72
																																						3.88	-22.5	-15.313	-12.813	-10.156	-2.6563	45.938	198.91	416.56	695.78	848.59	804.84
																																						3.885	-21.875	-17.344	-10	-11.25	-5	49.531	196.72	424.53	693.91	830.78	802.03
																																						3.89	-20	-14.219	-13.906	-13.438	-1.5625	44.531	200	417.19	689.38	824.22	802.81
																																						3.895	-20	-16.875	-12.188	-12.5	-0.3125	49.688	191.72	412.66	700.94	833.75	800.78
																																						3.9	-23.906	-16.25	-13.125	-12.813	-1.7188	45.313	193.59	417.34	681.09	822.81	814.69
																																						3.905	-25.469	-17.344	-14.219	-10.781	-0.3125	45.781	190.47	416.88	693.13	844.84	794.06
																																						3.91	-22.344	-16.25	-13.438	-10.313	0.1563	47.344	192.34	414.22	695.31	842.5	794.53
																																						3.915	-23.75	-16.25	-14.219	-10	2.3438	48.438	193.91	415.78	703.44	827.19	803.59
																																						3.92	-22.5	-13.906	-14.063	-7.9688	-1.875	45	186.72	424.22	687.97	833.28	792.19
																																						3.925	-23.125	-17.344	-12.813	-14.375	-0.7813	48.906	192.81	413.44	694.69	846.72	808.13
																																						3.93	-25.313	-18.281	-14.375	-9.6875	-2.9688	45	200.47	417.66	701.25	842.97	823.75
																																						3.935	-23.125	-16.25	-12.813	-15	-2.9688	44.219	202.81	407.81	684.84	839.69	814.69
																																						3.94	-22.031	-17.344	-12.813	-8.75	-0.3125	38.594	197.34	416.56	691.56	823.44	787.19
																																						3.945	-20.781	-16.25	-12.031	-12.813	-2.9688	49.844	195.16	422.19	692.34	832.34	802.03
																																						3.95	-22.5	-16.094	-13.125	-17.5	-6.7188	45.313	189.22	413.91	712.03	839.06	795.94
																																						3.955	-21.094	-17.344	-13.75	-10.938	-1.25	44.219	193.13	422.81	715.63	828.13	795.78
																																						3.96	-24.844	-20.625	-13.438	-10.625	-3.9063	46.719	199.53	429.53	710.31	859.84	797.81
																																						3.965	-24.219	-15.938	-14.531	-16.25	-1.7188	46.25	201.09	420.78	710.94	829.84	775.31
																																						3.97	-24.688	-15.156	-17.344	-11.719	-5.3125	45.469	198.75	427.5	695.31	832.34	787.34
																																						3.975	-24.219	-15.469	-14.375	-11.25	-3.4375	40.781	198.75	425.63	692.03	821.25	815
																																						3.98	-24.531	-17.5	-11.094	-14.219	-2.0313	46.094	196.09	424.22	693.13	827.5	807.03
																																						3.985	-24.844	-17.031	-12.031	-10.625	-5.7813	52.031	200.16	422.19	688.75	827.19	809.06
																																						3.99	-22.344	-17.344	-11.875	-12.5	-2.3438	47.969	200.63	425.31	665.78	832.03	815.94
																																						3.995	-22.969	-16.875	-13.906	-10.938	0.4688	44.688	195.94	430.47	680.78	837.03	811.72
																																						4	-23.594	-15.156	-12.031	-13.125	-0.3125	45.313	196.25	427.19	704.38	840.31	808.28
																																						4.005	-25.625	-19.219	-11.875	-14.375	-1.875	47.344	204.22	427.81	701.09	836.56	806.09
																																						4.01	-22.813	-17.969	-10	-15.625	-5.625	48.281	207.03	425.78	700.78	823.28	792.81
																																						4.015	-22.969	-16.406	-12.656	-13.438	-5.7813	48.281	197.03	430.63	690.78	814.22	790.16
																																						4.02	-24.844	-17.188	-14.531	-12.969	-5.1563	42.344	199.38	431.72	701.88	827.5	807.5
																																						4.025	-24.844	-15.469	-14.531	-14.063	-4.8438	42.813	203.59	432.19	712.97	823.59	802.97
																																						4.03	-26.563	-17.656	-15.469	-10	-2.3438	45.313	203.13	430.16	711.25	841.09	792.19
																																						4.035	-25.469	-17.5	-14.219	-15.313	-1.7188	47.031	192.19	435.31	700.63	838.75	792.34
																																						4.04	-24.063	-17.031	-12.188	-9.2188	0.3125	42.344	198.44	429.53	704.06	823.28	787.34
																																						4.045	-21.563	-19.844	-16.719	-11.25	-0.4688	43.906	190.31	429.06	699.06	805.16	797.66
																																						4.05	-21.406	-19.844	-14.375	-11.563	-5	48.125	196.09	436.09	701.72	811.72	800.94
																																						4.055	-22.5	-16.719	-15	-11.875	-5	46.094	200.16	437.34	682.34	819.06	806.56
																																						4.06	-23.281	-18.438	-16.406	-11.406	-4.0625	48.75	206.56	455.47	692.03	819.38	804.38
																																						4.065	-23.594	-17.5	-17.031	-12.344	0.4688	47.813	203.75	443.59	707.5	812.5	785.94
																																						4.07	-22.969	-21.25	-11.25	-12.5	-0.7813	49.844	196.41	442.03	705.47	845.31	809.84
																																						4.075	-23.281	-19.063	-12.5	-12.813	-2.8125	47.031	204.38	443.91	705.78	839.53	798.44
																																						4.08	-22.5	-17.188	-12.656	-13.75	-1.25	49.219	202.97	443.28	710.63	828.75	795.47
																																						4.085	-26.719	-13.594	-15.781	-11.094	-1.5625	48.75	203.13	424.06	703.91	839.84	797.34
																																						4.09	-23.594	-16.563	-14.063	-12.813	-1.25	47.813	195.31	432.81	703.44	846.41	792.03
																																						4.095	-21.875	-17.969	-14.844	-14.219	-0.1563	48.438	191.09	445.47	716.41	823.44	790.16
																																						4.1	-25.781	-15.313	-12.344	-13.75	-4.0625	49.063	191.88	434.22	726.41	835.63	790.63
																																						4.105	-26.719	-16.406	-10.625	-12.5	0.4688	42.188	193.91	440.63	717.03	825.31	805.47
																																						4.11	-23.906	-21.406	-13.438	-12.969	-2.1875	47.344	197.5	439.38	721.56	812.03	820
																																						4.115	-20.625	-16.719	-13.438	-11.25	-1.5625	41.25	192.03	430.63	716.56	823.59	816.56
																																						4.12	-22.344	-18.438	-11.25	-9.6875	-2.8125	46.406	196.25	440	717.81	823.75	803.75
																																						4.125	-23.906	-18.281	-15	-10	2.0313	46.563	203.75	438.59	701.41	845.94	810.31
																																						4.13	-20.156	-18.125	-16.094	-15	-1.875	51.719	195.16	438.28	701.72	823.59	807.66
																																						4.135	-22.031	-18.594	-10.313	-13.125	0.4688	46.406	202.97	442.97	699.06	827.34	808.13
																																						4.14	-21.094	-17.5	-14.531	-10	0.9375	44.063	202.03	439.84	689.38	824.38	786.41
																																						4.145	-22.031	-19.531	-11.094	-13.906	-1.0938	45.781	204.69	431.88	700.63	822.03	804.38
																																						4.15	-24.063	-18.594	-14.063	-10.625	-2.3438	44.219	195.78	429.38	701.56	842.97	797.5
																																						4.155	-22.344	-18.281	-13.438	-13.438	-4.8438	45.938	197.97	422.34	696.72	843.13	807.97
																																						4.16	-19.219	-20.781	-8.9063	-10.156	-3.75	45.938	208.91	428.44	692.5	846.88	796.09
																																						4.165	-22.188	-18.594	-13.125	-11.875	-1.7188	38.125	201.25	435.78	688.75	840.63	823.75
																																						4.17	-22.969	-15.156	-12.656	-11.25	-5.4688	47.656	197.19	441.56	700.16	848.44	813.91
																																						4.175	-24.375	-15.625	-12.031	-12.344	-1.0938	44.531	208.44	439.69	695.16	850.31	807.97
																																						4.18	-21.875	-19.375	-12.813	-14.531	-2.3438	41.406	207.66	434.38	697.81	843.91	814.22
																																						4.185	-20.938	-17.656	-7.9688	-6.7188	-3.2813	46.563	207.66	446.09	708.13	848.91	827.66
																																						4.19	-23.281	-20	-11.25	-10.156	4.6875	49.844	205.16	451.09	704.69	865.31	833.13
																																						4.195	-22.969	-19.844	-14.688	-13.906	0.1563	46.406	203.13	438.28	718.75	857.66	804.69
																																						4.2	-24.688	-17.031	-14.844	-12.188	-5.1563	50.625	204.06	448.28	725.94	842.03	812.81
																																						4.205	-23.75	-18.906	-12.969	-8.2813	-4.375	47.188	211.72	445.31	727.97	833.28	778.75
																																						4.21	-21.875	-22.656	-14.688	-13.906	-3.9063	49.063	219.69	455.78	730.94	827.5	770.47
																																						4.215	-21.406	-18.75	-12.969	-14.063	-2.9688	48.281	214.22	439.53	716.09	825.31	798.91
																																						4.22	-22.5	-19.688	-14.375	-12.188	-7.5	47.344	214.69	437.66	728.28	842.19	810.78
																																						4.225	-18.75	-18.906	-8.4375	-11.563	-3.5938	48.125	211.25	451.88	715.16	815.94	815.31
																																						4.23	-22.188	-17.188	-11.25	-12.656	-2.1875	44.688	201.72	438.91	716.09	824.53	807.19
																																						4.235	-22.656	-16.875	-16.094	-14.063	-4.8438	47.969	210.16	441.09	707.81	828.91	797.5
																																						4.24	-23.438	-17.344	-14.844	-12.5	2.6563	48.125	213.28	439.06	722.19	841.09	790.47
																																						4.245	-21.563	-18.906	-14.063	-15.156	-4.8438	55.625	211.88	444.53	731.72	850.31	788.91
																																						4.25	-23.125	-19.063	-12.656	-11.875	-3.75	44.063	211.09	437.03	722.19	864.53	792.66
																																						4.255	-22.031	-16.875	-14.531	-12.813	-3.125	48.906	213.91	447.19	716.56	842.19	786.09
																																						4.26	-19.375	-18.906	-11.094	-13.438	-1.7188	46.719	213.13	450	736.41	836.72	793.91
																																						4.265	-20	-18.906	-11.875	-11.875	-0.1563	50.156	207.97	455.94	716.41	843.28	798.75
																																						4.27	-22.5	-17.5	-10.625	-13.125	-1.4063	47.344	213.28	458.28	707.03	827.5	806.09
																																						4.275	-19.531	-20.625	-10.469	-12.5	-0.1563	44.531	211.88	449.84	726.88	821.25	802.66
																																						4.28	-19.219	-22.5	-14.219	-11.875	-1.7188	45	205.47	450	720.31	833.59	793.75
																																						4.285	-18.594	-17.5	-10.625	-11.25	-0.4688	50.781	217.03	441.09	710.63	832.34	805.31
																																						4.29	-18.75	-16.563	-11.25	-12.656	-2.1875	47.656	217.03	443.44	717.66	855	782.19
																																						4.295	-20	-18.281	-16.406	-12.031	-0.1563	47.031	214.22	459.84	712.66	849.84	787.81
																																						4.3	-21.25	-17.344	-15.313	-9.375	-3.9063	47.188	215.63	445.63	716.56	826.41	794.69
																																						4.305	-23.281	-16.25	-11.875	-13.906	0	46.563	212.03	439.53	732.19	825.94	812.5
																																						4.31	-21.094	-16.719	-15	-9.6875	-0.3125	45.938	201.88	432.19	724.84	849.53	805.63
																																						4.315	-24.063	-16.719	-9.6875	-8.5938	-0.1563	42.188	212.81	435.63	738.91	860.63	790.78
																																						4.32	-22.031	-15	-13.125	-9.8438	-3.9063	45.156	208.75	452.19	719.84	861.88	785.16
																																						4.325	-20.469	-16.875	-14.219	-9.8438	0.4688	48.438	206.72	444.53	730.63	853.44	782.34
																																						4.33	-21.719	-17.031	-15.156	-13.75	1.25	46.719	213.28	446.72	730.31	843.91	810.47
																																						4.335	-22.188	-16.094	-13.906	-11.563	2.0313	43.594	211.41	447.97	728.28	855.94	795.16
																																						4.34	-23.125	-18.906	-13.125	-15.625	0.625	44.531	208.91	445.16	725	853.91	787.97
																																						4.345	-23.906	-16.094	-15.469	-12.5	-1.25	50	204.38	457.19	744.69	852.03	796.56
																																						4.35	-23.438	-15.313	-13.75	-10.938	-3.125	52.813	206.41	457.5	724.53	836.88	808.13
																																						4.355	-20.625	-18.594	-13.594	-8.2813	-0.625	49.219	208.91	448.59	726.56	832.81	811.09
																																						4.36	-23.125	-16.875	-12.656	-13.594	-4.8438	50.469	211.09	439.38	718.13	843.59	822.5
																																						4.365	-24.688	-18.438	-13.125	-14.063	-1.25	53.594	209.69	441.88	735.31	859.69	823.44
																																						4.37	-19.375	-13.75	-13.906	-13.125	-5	52.656	208.59	448.28	727.19	847.34	817.81
																																						4.375	-20	-17.969	-12.5	-11.25	-3.125	54.063	212.34	453.28	717.03	843.75	821.72
																																						4.38	-22.031	-17.656	-15.938	-10.781	-0.9375	49.531	204.69	450.94	717.66	861.72	811.41
																																						4.385	-22.656	-16.719	-15.781	-11.25	-2.5	55.313	193.28	465.16	717.97	857.34	809.53
																																						4.39	-20.469	-17.188	-13.125	-12.344	-2.8125	50.469	190.94	447.97	728.59	849.84	817.34
																																						4.395	-19.688	-14.844	-15.625	-11.094	1.5625	50.313	195.31	468.91	724.84	858.59	820.78
																																						4.4	-26.094	-14.063	-14.531	-9.375	-5	48.281	202.34	471.09	732.34	857.81	814.53
																																						4.405	-22.5	-21.25	-14.063	-11.875	-1.5625	52.188	198.75	452.81	723.59	852.81	790.78
																																						4.41	-22.344	-17.344	-14.531	-7.8125	-2.3438	50.781	207.19	462.66	714.69	845.78	806.09
																																						4.415	-22.5	-17.188	-12.188	-11.875	-1.25	46.563	204.53	462.34	717.66	850.47	807.34
																																						4.42	-24.844	-16.25	-15	-11.875	-5.4688	49.063	202.66	449.38	720.47	851.41	808.75
																																						4.425	-22.656	-14.688	-14.531	-12.344	0.1563	55.156	205.47	447.66	711.88	842.66	816.41
																																						4.43	-23.906	-16.25	-15.313	-11.563	-6.5625	51.406	206.56	437.34	717.97	849.84	804.22
																																						4.435	-24.063	-16.094	-15.469	-10.156	-3.4375	59.844	205.47	433.28	717.34	846.72	817.19
																																						4.44	-23.75	-17.344	-13.125	-11.875	-5.1563	52.188	210.94	440	719.84	840.94	812.97
																																						4.445	-22.344	-14.844	-17.813	-10.469	-7.1875	58.594	198.28	456.72	728.28	857.66	809.06
																																						4.45	-23.906	-20	-13.438	-8.9063	-4.8438	52.813	197.5	444.38	722.03	848.44	779.84
																																						4.455	-24.375	-17.188	-16.25	-10.625	-3.125	52.031	204.84	458.13	720.47	844.69	783.13
																																						4.46	-21.719	-21.25	-14.063	-11.094	-5	46.719	203.44	455.63	710.78	845.16	787.81
																																						4.465	-22.813	-16.563	-13.281	-12.5	-1.7188	48.281	200.63	449.69	708.75	829.84	800.63
																																						4.47	-23.125	-18.281	-13.906	-11.25	-3.5938	46.719	203.91	447.81	724.84	838.28	801.56
																																						4.475	-23.281	-15.781	-12.656	-9.375	0.9375	47.656	201.72	455.16	722.97	830.94	805
																																						4.48	-20	-17.656	-15.313	-10.938	0.9375	51.875	208.28	456.72	723.28	822.81	812.5
																																						4.485	-20.938	-17.969	-15.625	-9.375	-4.375	51.875	203.59	453.75	735.78	849.06	805.16
																																						4.49	-20	-19.375	-15	-12.5	-2.5	50.156	207.34	456.41	732.03	843.75	788.28
																																						4.495	-19.844	-19.063	-14.844	-16.25	-1.875	52.031	215	457.19	722.19	852.81	788.28
																																						4.5	-22.969	-18.594	-13.281	-14.688	-1.5625	47.188	207.81	461.41	715	844.84	795.94
																																						4.505	-20.156	-17.969	-14.688	-12.813	-0.625	48.594	205.31	455.47	707.03	826.25	819.38
																																						4.51	-24.844	-19.219	-10.781	-15	-6.25	53.125	209.84	455.94	709.53	815.31	799.06
																																						4.515	-21.563	-14.844	-17.344	-14.844	-1.7188	50.781	212.34	447.03	705.31	835.31	795.31
																																						4.52	-22.5	-18.125	-12.031	-10.625	-1.7188	55.625	215.47	457.5	717.66	848.59	804.84
																																						4.525	-24.531	-19.063	-12.344	-17.969	-2.1875	55.156	217.66	454.69	717.81	850.94	788.44
																																						4.53	-21.25	-17.5	-12.656	-12.344	-3.5938	56.719	211.88	460.94	700	837.5	799.84
																																						4.535	-25	-17.656	-15.313	-10.938	-3.9063	57.969	218.59	458.91	710.63	835.63	786.56
																																						4.54	-22.344	-17.344	-12.813	-13.281	1.0938	54.063	216.09	456.72	721.88	828.91	801.41
																																						4.545	-21.25	-19.844	-15.156	-10.625	-2.5	51.25	218.59	462.03	735.31	837.19	780.78
																																						4.55	-23.281	-13.75	-12.813	-11.563	-3.2813	49.375	212.34	447.97	732.34	839.69	788.13
																																						4.555	-22.344	-15.625	-14.688	-11.719	-4.0625	46.563	209.38	451.09	737.19	830.16	789.69
																																						4.56	-23.281	-18.281	-16.406	-12.813	-2.8125	46.25	205.63	449.84	735.31	824.53	790.78
																																						4.565	-21.406	-17.656	-12.969	-10.625	-1.4063	49.844	211.09	448.13	737.97	823.44	816.09
																																						4.57	-24.063	-18.906	-14.688	-13.281	2.5	52.344	212.5	441.72	744.53	835.31	812.03
																																						4.575	-18.438	-16.875	-13.125	-16.719	2.1875	49.219	214.84	458.75	735.16	827.81	794.06
																																						4.58	-20.938	-19.688	-10.625	-15.625	1.4063	48.75	208.91	457.97	733.75	856.41	808.13
																																						4.585	-24.531	-19.688	-16.25	-14.375	-0.625	48.594	214.53	456.41	709.84	854.84	804.38
																																						4.59	-19.219	-17.031	-15.938	-8.9063	-1.25	46.094	210.78	452.03	729.84	850.47	803.13
																																						4.595	-22.344	-15.938	-12.188	-15.156	-2.0313	49.688	215.16	460.78	726.72	847.5	797.97
																																						4.6	-20.781	-15.781	-11.25	-9.8438	-4.375	51.25	213.28	460.31	731.56	843.13	806.56
																																						4.605	-23.75	-16.406	-16.875	-13.438	-2.5	52.031	217.5	459.22	718.75	842.34	795.78
																																						4.61	-22.344	-14.844	-12.188	-10.156	-2.1875	50.469	202.19	451.56	712.03	852.97	812.03
																																						4.615	-21.563	-15.313	-14.375	-11.563	-0.4688	49.375	204.22	465.16	726.09	833.91	789.22
																																						4.62	-21.406	-19.063	-13.125	-13.594	-2.5	47.656	211.88	450.94	713.91	831.09	790.31
																																						4.625	-22.031	-14.688	-16.875	-12.813	-6.4063	50.938	221.72	447.81	754.84	847.97	805.94
																																						4.63	-21.719	-19.531	-15.156	-12.188	-1.875	46.094	213.59	450.63	746.56	837.5	804.84
																																						4.635	-19.844	-16.719	-15	-12.5	3.75	55.781	213.28	454.69	721.25	840.94	796.09
																																						4.64	-23.438	-18.125	-14.063	-14.531	-2.8125	55	210.94	449.38	726.25	845.31	799.38
																																						4.645	-21.25	-16.875	-15.156	-12.969	-1.875	48.281	217.19	448.44	718.28	846.88	795.16
																																						4.65	-23.75	-14.219	-15.156	-12.969	-0.3125	46.094	212.81	460.31	713.13	843.28	781.56
																																						4.655	-27.344	-15.156	-13.75	-11.563	-3.125	49.219	212.34	462.81	710	837.19	799.69
																																						4.66	-22.813	-21.719	-14.219	-16.094	-3.2813	47.344	214.22	458.28	717.19	869.22	798.44
																																						4.665	-22.031	-14.688	-13.75	-14.688	-1.25	51.406	209.38	462.03	729.38	855.94	789.38
																																						4.67	-21.094	-20.313	-11.719	-12.813	-2.3438	49.688	209.84	470.16	724.69	849.53	786.72
																																						4.675	-21.25	-16.094	-14.375	-15.938	-1.0938	50.625	206.72	453.59	755	859.06	777.97
																																						4.68	-22.813	-16.406	-11.25	-10	-0.4688	51.406	213.44	450.16	731.72	854.06	784.84
																																						4.685	-25.781	-18.281	-13.906	-10.781	-2.9688	49.219	214.53	453.91	723.91	840.63	796.41
																																						4.69	-22.344	-18.438	-16.094	-15.313	-1.25	50.625	211.41	470.94	730.94	844.69	793.59
																																						4.695	-20	-16.406	-13.125	-15.469	-4.5313	53.438	210.47	457.81	731.41	850.47	807.5
																																						4.7	-23.438	-15.313	-12.813	-13.438	-4.0625	51.406	211.88	456.09	731.72	842.81	798.44
																																						4.705	-23.906	-16.406	-14.063	-14.063	-1.5625	56.094	220.31	460.63	741.72	852.03	784.84
																																						4.71	-22.031	-18.281	-15.625	-10.781	-0.9375	53.281	214.84	451.88	734.38	854.69	772.34
																																						4.715	-21.875	-17.5	-13.125	-13.438	1.4063	55.313	216.09	454.38	719.22	844.06	778.44
																																						4.72	-23.594	-14.219	-15.938	-11.25	0.1563	52.656	212.81	465	717.5	855.31	803.28
																																						4.725	-22.188	-17.813	-13.281	-14.531	-1.875	53.438	220.47	469.69	736.72	851.09	786.72
																																						4.73	-24.531	-15.625	-15.313	-14.688	-0.7813	49.531	215.16	454.22	725.78	843.75	799.38
																																						4.735	-25.625	-17.031	-13.75	-14.219	-1.5625	54.531	208.13	459.06	740.94	834.38	801.56
																																						4.74	-22.813	-13.594	-10	-16.094	-3.9063	50.313	212.81	464.69	719.38	825.94	786.56
																																						4.745	-23.594	-15.469	-14.219	-13.594	-4.5313	55.625	207.34	469.53	726.56	816.09	780.16
																																						4.75	-23.75	-14.844	-14.375	-16.406	-1.875	52.031	216.25	473.13	717.34	823.44	799.06
																																						4.755	-23.281	-17.188	-14.219	-13.125	-1.0938	47.969	215.47	472.34	733.13	825.31	819.22
																																						4.76	-23.594	-17.813	-15.938	-13.906	-1.0938	50.625	217.19	461.09	719.69	808.59	805.78
																																						4.765	-23.75	-16.875	-12.344	-11.25	-2.3438	50.156	220.47	459.69	732.97	827.81	801.09
																																						4.77	-23.75	-16.719	-10.469	-11.406	0.4688	49.844	219.69	462.5	735	834.38	798.75
																																						4.775	-24.844	-15	-11.563	-11.406	-2.3438	50.625	211.56	444.38	732.5	840.47	794.53
																																						4.78	-27.344	-13.438	-13.906	-13.438	-2.8125	49.375	211.56	447.97	753.75	848.13	792.81
																																						4.785	-24.688	-12.344	-14.844	-10.938	-2.5	47.344	213.28	460.31	756.09	832.34	787.5
																																						4.79	-27.188	-16.406	-12.969	-12.344	-5.625	45.938	219.69	467.03	732.97	848.28	802.03
																																						4.795	-20.938	-16.875	-15.625	-16.406	0	46.25	211.41	464.84	736.09	865.78	794.53
																																						4.8	-26.563	-17.5	-17.656	-13.125	-2.3438	47.188	209.22	477.97	728.13	855.94	778.91
																																						4.805	-20.469	-15.781	-14.375	-13.281	-3.9063	49.219	216.56	475.16	738.91	839.22	783.59
																																						4.81	-24.375	-18.75	-13.438	-12.5	-0.1563	48.75	211.25	457.19	748.75	854.53	808.28
																																						4.815	-22.656	-19.531	-14.219	-15.156	-2.1875	43.281	211.09	472.97	749.38	846.09	797.5
																																						4.82	-23.125	-17.031	-11.875	-9.8438	-2.3438	49.844	209.84	474.53	748.13	836.56	807.19
																																						4.825	-23.906	-14.844	-12.969	-10.156	-2.3438	57.188	220.63	470.63	751.88	846.88	784.38
																																						4.83	-24.219	-19.844	-11.25	-12.813	1.0938	51.563	216.88	470.31	754.84	843.13	792.34
																																						4.835	-25.625	-17.969	-15.156	-11.719	-1.0938	54.375	215.63	472.81	750	854.84	783.59
																																						4.84	-22.813	-15.313	-13.125	-10	-1.25	55	211.88	476.09	734.06	857.5	790.47
																																						4.845	-24.063	-16.719	-17.188	-14.531	0.4688	54.219	223.28	471.09	737.97	857.66	791.56
																																						4.85	-26.875	-17.813	-15.156	-11.25	-0.9375	48.75	220.94	468.44	727.03	868.28	792.34
																																						4.855	-20.313	-19.219	-11.25	-12.344	-4.0625	51.563	220.31	460.16	728.91	854.38	802.81
																																						4.86	-19.844	-20.469	-12.344	-10	0.3125	55.156	219.06	467.81	724.22	870.94	800.78
																																						4.865	-26.875	-18.594	-12.656	-12.344	0.9375	53.125	220.16	473.28	723.28	859.22	790.78
																																						4.87	-23.906	-19.531	-14.375	-13.75	-3.2813	51.719	223.44	477.19	727.66	861.56	785.47
																																						4.875	-22.656	-16.875	-11.406	-14.375	-2.0313	55	227.19	479.69	743.59	847.66	778.59
																																						4.88	-21.094	-15.625	-13.125	-13.438	0	60.313	213.44	478.44	744.22	857.81	796.56
																																						4.885	-23.281	-15.625	-14.688	-12.188	0.625	50.625	221.72	473.13	741.25	852.81	789.53
																																						4.89	-25.625	-16.25	-14.531	-9.0625	-2.3438	52.344	218.75	461.41	727.66	852.97	795.47
																																						4.895	-23.125	-16.875	-13.906	-13.281	-0.9375	57.969	219.84	472.81	728.75	829.69	797.34
																																						4.9	-24.844	-16.25	-14.375	-12.188	1.5625	59.688	221.09	470.16	730.47	832.34	804.69
																																						4.905	-20.781	-17.969	-13.594	-11.563	-0.3125	57.656	216.09	475.31	721.88	845	805.78
																																						4.91	-20.781	-22.656	-16.094	-10	-1.7188	54.844	214.53	459.06	730.63	848.75	811.41
																																						4.915	-25.625	-16.25	-12.813	-11.875	2.0313	53.906	213.91	471.41	726.09	853.59	803.44
																																						4.92	-25.625	-17.969	-13.75	-13.281	-2.3438	52.344	220.31	480.63	743.91	857.5	811.56
																																						4.925	-22.5	-16.875	-15	-12.031	0.3125	62.969	220.94	467.34	741.72	867.81	791.56
																																						4.93	-25	-13.594	-13.906	-15.938	-1.4063	62.344	215.31	463.13	753.13	860.16	788.28
																																						4.935	-24.375	-14.219	-12.969	-9.5313	0.4688	64.063	211.41	473.44	724.84	859.06	797.03
																																						4.94	-27.656	-15.156	-14.063	-10.313	0.7813	64.063	209.53	470	735.31	853.28	801.09
																																						4.945	-20.938	-16.719	-12.5	-13.594	-2.0313	61.25	215.31	474.38	757.19	855.16	811.41
																																						4.95	-21.719	-17.344	-14.688	-10.938	0.7813	56.406	214.53	476.88	752.97	865.94	792.19
																																						4.955	-24.531	-18.125	-15.313	-12.813	-2.1875	54.219	210.94	480.94	753.13	869.38	786.25
																																						4.96	-22.188	-20	-13.281	-13.906	-5.625	56.719	215.94	474.06	743.59	854.69	799.84
																																						4.965	-25.313	-15.938	-10.938	-16.875	-4.0625	52.969	215.16	476.41	742.97	854.53	794.06
																																						4.97	-21.406	-19.844	-14.063	-14.688	1.7188	56.719	209.53	472.81	737.66	856.88	813.28
																																						4.975	-22.5	-18.906	-13.906	-12.813	-4.375	57.813	215	473.44	719.06	864.69	794.06
																																						4.98	-26.25	-18.125	-11.406	-13.75	-2.1875	53.281	216.88	485.16	724.22	866.72	791.56
																																						4.985	-27.031	-18.125	-12.344	-15	0.4688	59.219	214.69	464.84	720.94	865	801.88
																																						4.99	-22.188	-16.875	-12.344	-12.188	0	59.531	219.84	473.44	722.5	852.03	787.34
																																						4.995	-21.875	-14.063	-12.031	-11.25	-5.1563	57.813	214.53	476.56	712.03	869.53	790.78
																																						5	-26.563	-14.531	-13.594	-11.719	0.4688	56.25	220.63	482.34	723.59	866.09	787.03
																																						5.005	15.781	13.281	5.9375	-1.0938	-3.4375	30.469	140.16	293.44	448.13	526.72	515.47
																																						5.01	1.0938	-3.2813	-3.5938	-5.7813	-2.1875	39.688	157.66	363.28	592.5	736.72	760
																																						5.015	-3.125	-8.2813	-2.3438	-6.0938	-2.5	44.844	167.81	411.56	669.84	851.56	899.69
																																						5.02	-4.6875	-4.8438	-3.125	-9.2188	-2.5	42.813	179.84	433.75	724.84	924.69	983.13
																																						5.025	-2.9688	-3.125	-8.4375	-10.313	-4.2188	41.719	184.22	450.63	768.91	973.75	1036.7
																																						5.03	-7.0313	-7.8125	-7.0313	-10	-2.6563	48.594	177.34	459.06	792.66	994.06	1075.8
																																						5.035	-5.9375	-5.3125	-5	-7.6563	-0.7813	43.125	178.59	476.88	795.47	1007	1086.1
																																						5.04	-4.375	-4.8438	-6.7188	-10	-0.3125	45.781	181.09	472.34	809.53	1024.7	1091.1
																																						5.045	-6.25	-3.2813	-6.7188	-8.4375	-3.125	43.75	182.81	482.19	807.97	1025.8	1095.2
																																						5.05	-5.625	-0.9375	-5	-7.9688	0.3125	40.938	180.47	485.63	813.13	1029.5	1095.6
																																						5.055	-5.4688	-6.4063	-6.25	-7.3438	-0.7813	38.906	184.22	486.25	814.53	1024.2	1093.4
																																						5.06	-8.125	-6.0938	-7.6563	-8.125	-0.9375	40.781	187.5	480.16	801.56	1011.7	1083.9
																																						5.065	-7.9688	-8.9063	-7.3438	-2.9688	-0.4688	46.719	184.69	471.56	809.06	1013.1	1085.6
																																						5.07	-2.5	-7.1875	-9.6875	-8.9063	-4.0625	42.188	182.97	467.34	798.44	1013.1	1085.2
																																						5.075	-8.75	-5.625	-5	-7.8125	-5.4688	41.094	182.97	461.88	803.91	1006.1	1083.9
																																						5.08	-10.156	-6.5625	-5.1563	-9.5313	-5	43.594	180.94	464.69	801.72	988.59	1074.7
																																						5.085	-7.9688	-5.9375	-5	-7.8125	-0.1563	44.375	185.31	468.91	796.72	989.06	1068.9
																																						5.09	-6.25	-8.125	-7.8125	-7.3438	3.5938	40.156	185.78	469.69	789.84	978.44	1061.7
																																						5.095	-7.9688	-8.125	-11.719	-6.4063	0.3125	40.469	186.88	469.84	789.53	982.03	1049.8
																																						5.1	-10	-6.25	-8.4375	-9.6875	-2.5	43.281	178.44	477.97	780.94	976.56	1050.2
																																						5.105	-10.625	-9.5313	-5.7813	-8.9063	-0.1563	42.813	184.84	481.25	790.31	970.47	1041.7
																																						5.11	-7.6563	-6.5625	-5.9375	-7.8125	2.5	41.563	186.72	462.34	782.19	968.28	1041.9
																																						5.115	-10	-7.1875	-5	-3.75	-0.1563	39.844	185.31	469.84	774.69	969.84	1031.1
																																						5.12	-9.8438	-7.1875	-5.1563	-10.156	-1.5625	40.313	183.75	459.22	775	965.94	1025.6
																																						5.125	-7.9688	-7.3438	-6.5625	-6.0938	-1.5625	46.25	192.97	462.97	768.91	966.56	1029.5
																																						5.13	-9.8438	-8.4375	-6.875	-10.313	-2.6563	45.625	187.19	460.94	774.38	947.66	1021.4
																																						5.135	-7.3438	-4.5313	-8.5938	-6.25	0.1563	49.844	190	461.09	768.91	952.66	1016.6
																																						5.14	-7.5	-7.3438	-8.9063	-12.344	1.25	47.969	179.84	460.78	757.34	947.5	1018
																																						5.145	-7.9688	-7.5	-10.469	-7.3438	2.1875	47.344	185	468.28	765.16	941.09	1009.2
																																						5.15	-8.75	-5.4688	-10	-8.2813	-1.875	40.313	177.97	462.97	764.38	935.47	1001.4
																																						5.155	-6.0938	-6.5625	-3.4375	-9.8438	-1.4063	37.031	189.69	458.75	764.69	926.09	998.28
																																						5.16	-8.2813	-12.656	-6.25	-3.4375	-3.2813	41.719	183.28	455	754.69	922.81	987.34
																																						5.165	-6.25	-9.2188	-7.6563	-9.6875	1.875	45	186.88	452.03	754.53	920.63	985.31
																																						5.17	-8.4375	-5	-9.6875	-11.094	0.7813	41.406	176.72	454.53	745.63	915.94	975.31
																																						5.175	-6.7188	-6.5625	-5	-9.2188	-0.3125	40.938	179.53	442.66	738.28	915.63	976.09
																																						5.18	-9.375	-11.563	-7.6563	-7.5	-0.3125	42.656	171.72	451.25	746.25	917.66	975.94
																																						5.185	-6.25	-5	-7.8125	-8.9063	-4.5313	41.719	175.16	445.47	746.56	909.22	967.5
																																						5.19	-10	-7.6563	-8.5938	-6.7188	0.4688	44.688	176.25	449.38	739.84	900.78	970
																																						5.195	-7.8125	-6.25	-8.2813	-8.75	-3.2813	45.938	182.81	465.63	743.13	907.66	969.69
																																						5.2	-7.8125	-8.125	-5.4688	-6.0938	-0.1563	41.875	177.97	460	744.84	908.28	965.63
																																						5.205	-10.469	-9.8438	-6.5625	-10.781	-1.875	40.781	181.09	453.13	737.19	903.75	966.72
																																						5.21	-7.3438	-11.094	-7.8125	-9.0625	-3.125	42.188	171.09	447.81	730.47	904.53	949.69
																																						5.215	-7.6563	-9.8438	-5.625	-6.875	-0.7813	44.844	174.53	442.66	739.06	902.66	952.19
																																						5.22	-6.5625	-5.625	-5.7813	-10.625	-1.0938	44.688	171.56	450.78	741.56	902.03	952.81
																																						5.225	-7.8125	-7.8125	-6.0938	-10	-1.0938	46.406	175.94	441.56	737.5	894.84	944.22
																																						5.23	-8.2813	-7.3438	-7.9688	-10	1.7188	45	176.25	444.06	736.88	888.75	944.53
																																						5.235	-7.8125	-5.4688	-4.8438	-10	2.5	38.75	185.94	450.78	726.72	891.41	934.06
																																						5.24	-8.9063	-8.4375	-8.5938	-7.6563	-1.25	41.875	176.72	445.94	722.97	891.72	923.75
																																						5.245	-9.375	-7.5	-7.5	-10	0.1563	45.938	175.47	441.72	716.88	875	926.25
																																						5.25	-7.3438	-11.25	-4.5313	-7.3438	3.125	42.344	176.56	448.59	721.72	878.28	918.75
																																						5.255	-9.6875	-10.313	-10.625	-6.875	-4.6875	37.969	171.41	449.84	719.38	872.5	918.75
																																						5.26	-8.4375	-9.375	-9.0625	-5.9375	-0.625	36.406	171.41	434.22	726.41	873.75	914.84
																																						5.265	-7.1875	-7.9688	-7.1875	-10.781	-1.5625	38.438	174.84	445.94	731.56	866.09	915
																																						5.27	-7.1875	-7.5	-9.2188	-10.469	0	40.625	178.75	443.28	719.38	859.69	906.25
																																						5.275	-5.9375	-6.5625	-9.8438	-11.563	-4.375	40.781	170.94	440	721.41	861.72	912.66
																																						5.28	-8.75	-8.75	-8.75	-8.2813	-1.0938	43.438	178.59	429.84	718.91	857.5	917.81
																																						5.285	-8.4375	-6.5625	-6.25	-7.6563	-2.1875	40.469	176.72	429.38	716.09	867.81	903.91
																																						5.29	-6.25	-5.1563	-7.6563	-8.9063	-0.4688	43.75	171.41	427.03	720.47	862.03	897.81
																																						5.295	-7.9688	-3.5938	-8.125	-10.938	-0.625	39.063	174.22	441.09	710	853.44	896.09
																																						5.3	-9.6875	-9.2188	-6.0938	-9.5313	-1.25	45.469	171.72	439.38	712.5	860	898.13
																																						5.305	-9.8438	-8.125	-6.7188	-8.125	-0.3125	35.625	175.47	440.78	707.34	847.03	890.63
																																						5.31	-5.7813	-9.5313	-9.8438	-11.406	-0.625	39.531	174.38	434.22	710.31	841.72	892.19
																																						5.315	-9.2188	-11.094	-7.3438	-7.3438	-4.5313	44.063	178.91	433.91	705.94	846.72	885.16
																																						5.32	-7.8125	-6.875	-6.875	-7.5	-1.5625	42.969	178.13	434.53	707.66	836.09	887.97
																																						5.325	-5	-4.375	-5.4688	-10	-0.625	42.813	172.03	425.78	699.38	831.72	892.19
																																						5.33	-8.5938	-8.9063	-5.625	-7.1875	1.875	45	182.34	433.44	703.75	839.06	886.09
																																						5.335	-9.8438	-5	-6.5625	-10.938	-2.9688	42.344	181.09	426.09	696.09	833.44	887.97
																																						5.34	-6.7188	-6.4063	-7.0313	-9.8438	-0.9375	38.281	176.25	426.56	696.72	830.78	889.38
																																						5.345	-7.9688	-10	-8.5938	-9.0625	1.7188	46.719	181.25	432.81	695.47	833.44	872.19
																																						5.35	-6.5625	-5	-7.8125	-8.5938	0.3125	40.313	175.16	433.59	685.47	825.94	879.22
																																						5.355	-8.9063	-10	-8.75	-9.8438	1.7188	37.031	177.19	440.63	684.69	822.03	873.59
																																						5.36	-8.125	-11.563	-7.6563	-5.9375	-0.7813	44.531	173.59	432.81	691.88	830.47	870.16
																																						5.365	-7.9688	-5.4688	-10	-10	-0.625	44.063	169.22	432.5	691.25	824.53	874.22
																																						5.37	-6.25	-5	-9.5313	-10.469	-0.9375	39.844	171.25	426.56	688.91	822.81	858.91
																																						5.375	-5.1563	-6.25	-8.5938	-6.4063	-6.0938	44.375	172.97	427.34	688.75	812.97	864.38
																																						5.38	-6.875	-8.9063	-8.5938	-7.0313	0.3125	42.969	177.03	417.5	690.16	808.13	862.34
																																						5.385	-7.3438	-4.375	-5.1563	-5.9375	0.625	43.906	176.88	422.81	684.84	804.53	856.09
																																						5.39	-5.4688	-9.0625	-7.5	-5.4688	-0.3125	37.969	172.34	418.75	685.94	797.66	849.84
																																						5.395	-5.3125	-8.5938	-8.125	-9.0625	5.4688	36.875	173.91	422.81	683.91	800.31	844.53
																																						5.4	-9.0625	-7.3438	-9.6875	-11.25	2.3438	40.469	164.38	425.94	683.28	792.97	842.03
																																						5.405	-9.375	-6.875	-8.125	-9.6875	-4.6875	36.563	170.31	415.94	676.56	804.69	844.06
																																						5.41	-6.4063	-11.719	-7.6563	-9.0625	-0.4688	41.875	171.25	416.25	676.72	796.56	839.69
																																						5.415	-8.75	-9.0625	-9.2188	-7.6563	-3.2813	41.094	178.44	415.16	672.19	795.63	829.22
																																						5.42	-6.25	-7.3438	-7.5	-11.25	-4.5313	40.469	176.72	421.09	669.69	796.09	827.03
																																						5.425	-4.8438	-6.4063	-7.9688	-8.4375	-2.0313	39.688	166.72	424.69	665	796.41	830
																																						5.43	-5	-7.6563	-7.8125	-9.6875	-2.3438	43.75	169.84	419.84	669.84	786.09	833.13
																																						5.435	-9.375	-6.25	-4.2188	-8.9063	1.0938	39.844	177.5	413.75	672.66	782.19	835.47
																																						5.44	-7.8125	-8.4375	-5.9375	-11.25	-2.1875	37.344	175.94	412.19	674.69	793.44	823.44
																																						5.445	-7.5	-7.8125	-6.25	-7.5	0.9375	41.563	172.97	414.84	667.97	782.66	820.63
																																						5.45	-8.4375	-7.3438	-7.9688	-6.5625	3.125	39.844	173.75	415.78	664.22	795.47	827.03
																																						5.455	-12.344	-8.5938	-4.8438	-11.875	-0.4688	39.844	173.59	410.78	655.31	785.78	820.78
																																						5.46	-7.8125	-10.938	-4.0625	-9.0625	-3.4375	42.813	167.03	417.03	659.22	778.44	815
																																						5.465	-6.875	-6.7188	-5.4688	-11.094	-1.5625	42.5	169.84	423.75	655.78	771.41	822.97
																																						5.47	-7.6563	-8.125	-7.0313	-8.125	-1.5625	39.063	168.75	422.03	654.06	777.97	818.13
																																						5.475	-7.8125	-7.1875	-8.125	-9.8438	-4.5313	37.656	168.59	416.72	660.63	775.31	805.16
																																						5.48	-4.375	-2.9688	-7.6563	-5.9375	-3.9063	39.219	171.72	424.69	659.84	767.81	807.97
																																						5.485	-6.7188	-5.9375	-9.2188	-8.4375	2.6563	39.844	172.5	428.75	651.41	771.41	805
																																						5.49	-7.8125	-5	-8.9063	-9.8438	1.0938	40.156	175	420.31	655.78	763.59	801.72
																																						5.495	-7.0313	-6.5625	-9.0625	-10	-0.1563	39.219	168.44	422.03	656.41	761.25	797.03
																																						5.5	-8.2813	-3.9063	-8.125	-10.313	2.0313	41.25	167.5	417.5	652.97	759.53	802.81
																																						5.505	-6.875	-5	-7.5	-7.3438	-1.25	36.719	169.69	407.97	638.75	763.13	802.97
																																						5.51	-5.7813	-9.6875	-7.6563	-8.125	-0.3125	42.813	166.72	408.28	649.69	756.56	795.31
																																						5.515	-6.7188	-6.875	-8.5938	-6.0938	-4.5313	36.719	168.59	412.34	641.09	756.25	809.38
																																						5.52	-7.1875	-8.125	-5.625	-8.75	-6.4063	39.844	166.72	411.41	637.97	755.94	803.44
																																						5.525	-5.9375	-7.5	-6.5625	-9.5313	-2.5	36.094	172.5	415.16	642.34	744.84	807.03
																																						5.53	-9.0625	-9.8438	-8.2813	-7.0313	-4.0625	43.75	169.38	409.38	646.72	746.72	802.97
																																						5.535	-9.375	-3.9063	-5.9375	-7.0313	-0.7813	40.469	170	415	642.81	750.63	794.53
																																						5.54	-4.0625	-4.5313	-8.125	-7.5	-2.5	39.219	170.94	403.59	640.16	743.13	792.03
																																						5.545	-11.25	-6.25	-8.125	-7.6563	-1.875	37.031	166.56	401.88	635.78	749.22	780.47
																																						5.55	-8.4375	-4.5313	-7.5	-5.9375	-1.5625	36.094	168.91	398.75	632.03	745.31	774.69
																																						5.555	-9.5313	-5.625	-7.8125	-3.9063	-2.0313	36.25	170.31	399.38	623.13	745.63	784.69
																																						5.56	-8.9063	-10.313	-6.4063	-5.4688	-3.4375	37.188	159.38	396.25	621.56	750.94	775.31
																																						5.565	-7.5	-2.8125	-6.5625	-4.5313	-2.6563	32.813	170.31	401.72	622.34	748.13	775
																																						5.57	-7.6563	-4.375	-3.5938	-7.9688	-3.125	35.781	169.69	396.09	621.88	752.81	770.16
																																						5.575	-3.5938	-5	-9.8438	-8.4375	-3.9063	34.063	160.78	391.25	622.81	745.78	773.59
																																						5.58	-6.0938	-4.5313	-4.2188	-5.9375	0.7813	36.406	168.75	404.53	619.53	740	775.78
																																						5.585	-7.6563	-7.0313	-7.8125	-6.5625	-2.8125	39.219	162.34	396.72	619.06	745.63	774.84
																																						5.59	-10	-7.9688	-8.2813	-4.0625	-2.5	39.375	164.06	402.81	621.72	741.41	765.47
																																						5.595	-6.0938	-5.7813	-6.875	-6.0938	-5.1563	41.094	165.78	408.75	620.16	739.38	762.5
																																						5.6	-10.313	-5	-7.3438	-9.2188	1.5625	36.719	158.13	406.09	621.88	734.69	760.47
																																						5.605	-10.625	-9.375	-6.5625	-5.3125	0.4688	36.719	166.25	404.69	615	729.84	762.97
																																						5.61	-3.5938	-6.0938	-7.3438	-5.4688	-1.7188	38.75	171.09	400.16	622.5	727.5	761.41
																																						5.615	-7.8125	-5	-7.0313	-8.125	1.875	35.781	168.13	405.16	620.78	722.81	763.13
																																						5.62	-4.8438	-7.3438	-9.0625	-6.0938	-0.1563	41.719	159.84	403.28	620	723.91	757.34
																																						5.625	-7.9688	-4.0625	-5.4688	-9.6875	-5.625	38.906	165.63	406.25	619.22	711.88	755.78
																																						5.63	-6.25	-4.5313	-5.7813	-9.0625	-3.125	39.688	167.03	404.06	613.28	710.78	752.81
																																						5.635	-7.5	-4.2188	-5	-10.469	-0.3125	41.563	165.16	398.75	605.16	708.75	746.41
																																						5.64	-10.156	-6.7188	-5.625	-8.4375	2.6563	39.063	170.47	400	607.81	721.88	752.34
																																						5.645	-8.125	-7.3438	-6.5625	-7.9688	-0.4688	42.344	168.28	406.56	606.56	712.19	751.56
																																						5.65	-6.875	-4.6875	-7.6563	-4.5313	0.9375	39.375	166.56	400.63	600.16	713.44	750.63
																																						5.655	-12.031	-5.9375	-6.7188	-0.1563	0.7813	42.344	169.69	401.41	593.44	722.5	746.09
																																						5.66	-8.75	-7.5	-4.5313	-2.0313	-0.3125	46.25	164.38	400.47	599.53	711.09	743.59
																																						5.665	-7.0313	-5	-5.7813	-7.3438	-1.4063	38.906	165.47	407.66	602.81	702.03	740.31
																																						5.67	-7.1875	-5.9375	-8.9063	-9.6875	-1.0938	45	168.13	399.84	598.13	711.72	730.31
																																						5.675	-10	-6.25	-5.7813	-11.094	-5	42.188	162.97	402.81	596.09	704.06	739.22
																																						5.68	-7.6563	-6.0938	-6.4063	-7.0313	0.4688	41.719	161.09	397.19	605.63	698.59	738.91
																																						5.685	-6.7188	-3.75	-6.7188	-2.5	-2.0313	39.844	160.78	394.06	599.69	690	739.38
																																						5.69	-6.25	-5.7813	-6.875	-5.9375	-0.625	39.844	164.06	390.31	606.72	702.66	739.22
																																						5.695	-8.75	-8.4375	-7.6563	-7.1875	-0.1563	40.625	159.53	397.5	605.16	712.97	736.88
																																						5.7	-7.1875	-6.0938	-7.8125	-8.75	0.4688	36.25	154.22	396.56	591.41	704.69	741.25
																																						5.705	-6.875	-7.3438	-4.6875	-3.125	-0.9375	34.688	158.44	397.03	588.44	709.06	732.19
																																						5.71	-5	-10	-4.0625	-9.8438	-0.1563	39.844	159.53	390.16	590.78	703.75	719.69
																																						5.715	-9.8438	-7.8125	-2.5	-8.75	0.625	38.75	160.63	393.44	593.44	701.09	734.22
																																						5.72	-8.75	-5.7813	-1.25	-9.375	-1.5625	41.094	160.78	386.56	588.44	698.28	735.78
																																						5.725	-7.3438	-9.0625	-5.3125	-5.7813	-3.125	42.813	164.06	382.97	590.47	692.34	732.81
																																						5.73	-8.4375	-4.8438	-7.0313	-3.125	-0.1563	43.281	158.44	380.94	592.97	684.69	725.78
																																						5.735	-9.0625	-6.4063	-5.7813	-3.4375	-2.3438	41.094	159.53	387.97	577.81	695.31	718.59
																																						5.74	-4.2188	-6.7188	-6.0938	-3.9063	-2.1875	40.625	163.59	388.91	591.09	681.56	722.03
																																						5.745	-11.406	-7.5	-4.6875	-11.406	-1.0938	41.875	167.34	387.03	586.56	688.75	728.13
																																						5.75	-8.2813	-5.3125	-6.875	-5.625	3.2813	39.375	167.81	376.25	587.34	678.44	728.91
																																						5.755	-9.5313	-6.5625	-2.8125	-7.0313	-5.1563	35.781	164.84	381.56	592.03	682.19	722.19
																																						5.76	-10	-7.5	-6.7188	-7.0313	-4.0625	35.781	164.22	379.06	581.88	678.59	719.06
																																						5.765	-7.3438	-5.9375	-7.3438	-5	0	35.938	157.19	381.41	586.88	679.06	715.16
																																						5.77	-7.8125	-4.0625	-8.5938	-4.6875	-0.1563	39.688	159.38	377.81	597.5	675.31	714.22
																																						5.775	-8.2813	-2.3438	-10	-8.125	-4.2188	39.844	155.63	380	588.75	672.97	710.94
																																						5.78	-6.5625	-6.5625	-3.9063	-5	-0.3125	37.344	156.25	381.09	587.19	671.09	720.78
																																						5.785	-8.9063	-5.7813	-4.8438	-11.25	-3.2813	40.313	156.88	384.84	582.5	678.59	711.72
																																						5.79	-7.6563	-7.6563	-9.0625	-7.3438	0.625	37.969	160.94	384.38	576.09	673.28	719.69
																																						5.795	-6.5625	-7.9688	-8.9063	-7.3438	-2.0313	36.094	159.69	379.53	577.81	673.28	714.69
																																						5.8	-5.625	-7.3438	-5.3125	-6.25	-2.0313	40.313	157.97	377.97	580.63	668.28	712.34
																																						5.805	-4.5313	-6.25	-7.0313	-5.625	-3.4375	39.063	162.34	376.41	568.91	666.56	705.47
																																						5.81	-7.6563	-6.7188	-3.9063	-6.875	-0.7813	34.531	159.84	373.91	572.34	672.34	697.34
																																						5.815	-7.0313	-5.625	-3.9063	-6.875	-1.25	35.625	157.97	379.22	565.94	669.84	708.59
																																						5.82	-7.1875	-6.5625	-8.4375	-5.3125	-3.4375	39.063	164.53	387.81	553.13	667.34	697.97
																																						5.825	-5.3125	-6.25	-7.0313	-7.0313	-2.9688	37.813	161.25	383.44	560.47	664.06	701.09
																																						5.83	-6.0938	-6.5625	-6.0938	-4.5313	-3.5938	38.281	152.34	377.66	565.16	651.09	695.31
																																						5.835	-6.875	-6.25	-10.156	-6.7188	-0.4688	40.781	157.5	362.5	569.53	653.91	700.47
																																						5.84	-1.0938	-6.25	-2.1875	-4.0625	0.625	38.281	152.97	366.88	568.28	656.09	696.09
																																						5.845	-6.875	-3.9063	-7.0313	-7.0313	-0.3125	40.469	155.63	373.59	573.13	655	688.59
																																						5.85	-8.4375	-4.375	-5.9375	-6.5625	-0.1563	31.25	159.22	371.88	570.31	658.75	695.31
																																						5.855	-7.3438	-6.5625	-5.9375	-5.3125	-1.875	32.188	160.78	371.09	561.72	656.41	687.5
																																						5.86	-7.0313	-9.8438	-4.375	-7.8125	-2.5	34.063	155.94	367.03	559.38	652.34	685.31
																																						5.865	-7.5	-5.3125	-6.0938	-7.6563	-2.5	35.156	156.88	366.25	564.06	658.13	691.25
																																						5.87	-5	-8.125	-5.9375	-9.8438	0	37.5	152.97	375.31	570	656.88	685.94
																																						5.875	-6.5625	-7.3438	-5.625	-7.8125	-3.5938	33.906	155.16	380.94	569.84	651.56	682.66
																																						5.88	-6.25	-4.2188	-6.0938	-5.4688	-1.5625	37.031	157.19	370.47	556.72	657.66	674.69
																																						5.885	-7.6563	-2.5	-6.0938	-2.0313	-1.25	36.719	162.03	370	563.91	655.31	675.78
																																						5.89	-3.9063	-4.375	-8.5938	-0.1563	0.4688	38.594	162.19	371.56	559.53	647.5	678.59
																																						5.895	-4.8438	-6.7188	-7.1875	-3.2813	-4.5313	39.375	158.75	380	565	650.16	677.97
																																						5.9	-6.875	-6.25	-3.4375	-4.5313	2.3438	37.5	159.06	366.72	559.53	645.31	673.13
																																						5.905	-7.8125	-6.0938	-2.9688	-6.7188	4.6875	30.469	162.19	373.59	553.91	654.06	679.84
																																						5.91	-3.2813	-8.75	-2.8125	-9.6875	-1.875	40.938	157.03	376.72	557.34	645.78	680.94
																																						5.915	-5	-5.7813	-3.4375	-5	-0.1563	38.75	155.78	376.41	555.94	650.94	670.63
																																						5.92	-2.8125	-5.7813	-7.9688	-4.375	-0.1563	37.969	158.44	372.5	559.06	643.91	675.47
																																						5.925	-5.625	-5.9375	-6.875	-3.75	-1.7188	36.875	157.19	369.22	557.97	644.84	672.5
																																						5.93	-5	-5.1563	-6.0938	-1.875	-0.4688	36.875	157.81	373.91	552.66	646.09	676.56
																																						5.935	-5.1563	-5	-3.5938	-5.9375	0.9375	32.813	157.81	369.38	559.84	640.47	671.72
																																						5.94	-5.3125	-3.2813	-3.4375	-7.5	-0.1563	35.156	162.97	365.16	552.34	639.06	663.28
																																						5.945	-8.125	-7.1875	-4.2188	-3.9063	0.4688	38.906	153.59	368.91	555.78	636.72	670
																																						5.95	-6.0938	-5.625	-7.6563	-7.3438	2.9688	35.469	157.5	373.44	554.38	632.66	665
																																						5.955	-5.1563	-9.0625	-6.7188	-4.2188	3.2813	37.188	155.47	368.28	554.69	635.94	664.84
																																						5.96	-5.4688	-9.5313	-5.3125	-2.5	1.4063	35.781	152.34	371.25	544.38	628.13	662.81
																																						5.965	-5	-6.0938	-7.0313	-4.2188	-0.625	39.063	151.25	369.69	546.72	638.13	656.56
																																						5.97	-7.6563	-5	-7.8125	-7.5	-0.7813	38.594	152.34	373.75	547.97	637.66	651.88
																																						5.975	-5.7813	-4.8438	-7.6563	-10	-5	35.938	158.59	372.66	546.88	627.97	658.28
																																						5.98	-2.0313	-6.5625	-4.5313	-7.6563	-3.75	39.531	159.84	366.72	545	616.88	657.03
																																						5.985	-7.9688	-7.8125	-4.5313	-6.5625	-4.6875	40.781	160.47	363.28	543.44	617.34	652.19
																																						5.99	-2.8125	-6.25	-5.7813	-8.5938	-5.625	38.75	160	361.56	536.88	620.47	662.66
																																						5.995	-7.3438	-7.3438	-6.4063	-7.9688	-0.4688	38.594	160.47	359.38	543.13	624.53	663.44
																																						6	-4.2188	-4.5313	-5.625	-3.125	-0.7813	40.938	154.06	352.81	543.91	620.78	656.88
																																						6.005	-8.75	-5.3125	-10.781	-2.5	-0.625	38.594	153.91	366.25	542.5	618.28	659.06
																																						6.01	-5.9375	-8.5938	-3.75	-3.4375	0.3125	37.344	156.56	361.25	539.53	615.94	651.56
																																						6.015	-7.9688	-6.25	-8.2813	-7.3438	-1.4063	40.156	149.53	362.81	530.31	614.69	649.53
																																						6.02	-6.0938	-5.9375	-5.3125	-2.6563	-1.4063	35.781	156.09	359.84	537.81	618.91	651.09
																																						6.025	-6.875	-5.9375	-4.0625	-6.5625	-2.6563	37.188	157.19	363.91	529.53	614.38	640.31
																																						6.03	-5	-6.5625	-6.0938	-5.1563	-3.4375	40.313	152.81	372.5	526.25	615.16	643.28
																																						6.035	-4.2188	-7.6563	-7.3438	-5.9375	-3.125	38.281	149.69	364.38	533.13	616.72	635
																																						6.04	-4.0625	-4.6875	-7.3438	-9.2188	-5.9375	37.656	155	372.34	529.84	611.88	642.81
																																						6.045	-7.9688	-4.0625	-6.0938	-8.75	-3.5938	37.969	155.78	375.31	533.75	604.53	634.84
																																						6.05	-7.0313	-5.1563	-4.5313	-8.9063	-2.9688	38.438	156.88	366.88	526.09	611.41	640
																																						6.055	-5.625	-5.3125	-7.1875	-2.9688	-1.5625	38.281	155.94	365.31	536.72	613.91	633.75
																																						6.06	-5.7813	-4.2188	-8.4375	-2.5	2.1875	37.656	156.72	362.97	534.06	617.81	626.25
																																						6.065	-8.9063	-5.3125	-3.5938	-9.8438	-0.1563	29.219	151.25	366.56	532.34	610.78	631.41
																																						6.07	-4.8438	-6.0938	-5.7813	-7.0313	-2.8125	33.281	154.84	355	532.03	611.56	639.69
																																						6.075	-7.3438	-3.4375	-7.3438	-5.625	-2.5	40.469	153.59	358.91	528.91	611.88	633.13
																																						6.08	-6.25	-8.2813	-7.8125	-9.0625	-1.25	39.063	160.47	355.94	530.31	605	628.28
																																						6.085	-6.7188	-3.2813	-5.7813	-6.5625	0.1563	31.094	155.78	352.97	531.25	605.63	631.88
																																						6.09	-5	-3.2813	-2.5	-3.2813	-2.0313	35.313	154.06	349.69	534.53	595.94	627.19
																																						6.095	-6.5625	-5.1563	-6.5625	-5.1563	-2.1875	38.281	150.78	359.38	525	600.78	633.75
																																						6.1	-5.4688	-1.5625	-4.8438	-5.625	-1.875	35.625	157.97	352.34	513.91	603.91	635.94
																																						6.105	-6.4063	-8.75	-5.3125	-2.0313	-1.4063	30	152.97	353.91	517.5	605.94	635.63
																																						6.11	-4.2188	-12.344	-8.2813	-5.9375	2.6563	34.219	152.03	350	514.69	614.38	635.16
																																						6.115	-7.6563	-4.2188	-4.8438	-7.0313	-0.4688	34.844	145.31	354.38	519.38	604.06	631.09
																																						6.12	-3.9063	-0.625	-3.75	-4.6875	-4.5313	35.781	157.5	350.78	519.84	602.66	631.72
																																						6.125	-3.9063	-3.9063	-7.0313	-7.1875	-2.5	37.5	154.22	360.94	517.66	605.78	628.59
																																						6.13	-5.3125	-8.125	-5.7813	-4.0625	-2.1875	35.469	157.03	362.19	523.13	602.03	637.5
																																						6.135	-4.6875	-4.2188	-4.8438	-6.25	-0.625	33.906	153.59	362.97	519.69	597.81	636.56
																																						6.14	-2.8125	-7.0313	-3.9063	-4.8438	-1.0938	35.313	153.59	353.91	522.19	599.84	638.28
																																						6.145	-4.8438	-4.2188	-2.1875	-8.125	-0.3125	35.313	157.81	346.25	528.91	600.94	636.09
																																						6.15	-2.0313	-4.375	-5	-4.375	-1.875	32.656	147.66	344.69	520.78	602.03	635
																																						6.155	-7.6563	-5.7813	-3.75	-8.2813	-4.8438	31.719	154.38	342.34	521.72	592.19	628.91
																																						6.16	-3.4375	-5.3125	-2.5	-5.3125	-3.5938	34.219	150.16	351.09	522.97	597.5	624.06
																																						6.165	-4.6875	-3.5938	-3.4375	-6.5625	0.7813	39.844	149.22	352.03	516.25	584.84	631.09
																																						6.17	-5.7813	-2.6563	-3.4375	-5.7813	-3.4375	33.594	147.34	345.16	514.22	586.72	623.59
																																						6.175	-5.9375	-3.9063	-7.8125	-5.9375	-2.3438	36.094	149.06	355	514.22	597.5	613.75
																																						6.18	-4.8438	-6.5625	-3.9063	-7.6563	-0.9375	36.875	148.75	349.69	524.69	590.16	622.5
																																						6.185	-6.5625	-8.125	-5.7813	-7.3438	-1.0938	34.375	149.69	346.41	514.38	597.81	621.56
																																						6.19	-2.9688	-5	-6.25	-5.625	0.3125	38.75	152.66	350.31	526.88	595.78	618.44
																																						6.195	-6.4063	-6.875	-7.8125	-5.7813	0.9375	36.563	152.66	350.94	521.72	591.25	615
																																						6.2	-2.5	-7.3438	-8.125	-4.6875	-1.7188	37.031	142.03	343.28	517.66	593.13	616.41
																																						6.205	-6.875	-5	-5	-2.8125	-2.8125	35.156	142.5	347.34	512.66	590.78	620
																																						6.21	-7.8125	-5.3125	-6.0938	-5.625	-1.5625	37.031	142.19	346.25	509.84	600	616.56
																																						6.215	-8.2813	-6.5625	-8.4375	-6.25	2.8125	40.469	148.28	348.91	500.47	587.19	614.22
																																						6.22	-3.2813	-3.125	-5.4688	-4.8438	0.1563	36.094	146.88	347.66	501.09	582.19	614.06
																																						6.225	-3.4375	-5.4688	-5.625	-4.0625	1.5625	39.531	149.06	350.47	504.06	582.34	618.59
																																						6.23	-4.6875	-5.1563	-4.375	-5.625	0	33.125	152.66	346.56	504.84	579.06	610
																																						6.235	-5.7813	-4.6875	-7.0313	-6.875	-1.0938	36.719	151.09	344.84	509.69	578.13	604.53
																																						6.24	-5.1563	-6.7188	-8.4375	-6.7188	-4.0625	41.719	156.72	337.19	504.22	571.88	599.38
																																						6.245	-6.5625	-6.5625	-3.4375	-8.4375	-1.0938	36.875	144.53	336.72	511.56	579.53	601.09
																																						6.25	-7.0313	-5	-4.5313	-2.8125	-2.8125	37.813	148.75	342.03	510.31	585	610.31
																																						6.255	-5.625	-6.25	-3.9063	-5.1563	2.9688	33.125	144.69	343.75	504.22	577.03	602.81
																																						6.26	-4.2188	-4.8438	-2.3438	-5.3125	0.625	38.594	148.44	347.5	493.59	578.75	611.25
																																						6.265	-6.875	-7.1875	-4.375	-6.4063	2.9688	32.969	142.19	353.13	504.84	580.78	608.75
																																						6.27	-3.75	-4.0625	-4.375	-6.7188	0.3125	34.531	147.97	342.81	507.03	582.81	611.88
																																						6.275	-5.4688	-5.1563	-4.0625	-4.5313	-2.9688	38.906	152.97	345.94	508.91	577.03	610.78
																																						6.28	-6.25	-5.625	-3.9063	-1.25	-0.3125	35.938	149.38	339.22	503.13	579.06	608.91
																																						6.285	-7.3438	-2.8125	-5.625	-3.9063	0.4688	34.375	148.44	344.84	496.88	569.22	611.09
																																						6.29	-5	-4.6875	-6.25	-5	-4.2188	36.563	148.44	340.63	500.78	558.59	595.78
																																						6.295	0	-5	-2.0313	-4.6875	0.4688	39.375	149.53	342.5	496.41	562.03	594.69
																																						6.3	-7.6563	-4.8438	-3.5938	-3.5938	0.4688	40.469	152.03	342.97	499.22	568.28	594.69
																																						6.305	-7.8125	-5.3125	-4.375	-5.1563	1.4063	36.875	153.44	344.38	498.75	567.5	595
																																						6.31	-7.6563	-7.8125	-0.3125	-3.4375	-0.4688	36.875	152.5	346.56	499.06	567.19	589.53
																																						6.315	-6.875	-5	-2.8125	-6.0938	0.1563	38.75	144.38	349.84	503.13	570.63	595.16
																																						6.32	-8.4375	-3.4375	-0.625	-6.25	3.2813	35.781	152.19	343.13	490.16	571.25	587.03
																																						6.325	-4.5313	-3.75	-5.9375	-8.125	-7.0313	32.656	147.97	334.53	499.22	563.91	581.72
																																						6.33	-5.7813	-6.5625	-1.4063	-4.375	-0.3125	37.813	147.66	339.69	488.75	566.56	587.66
																																						6.335	-5	-6.875	-7.3438	-5.4688	-2.1875	37.969	159.38	332.97	493.59	564.53	585.94
																																						6.34	-5.625	-5.4688	-3.5938	-1.0938	-1.5625	39.219	153.59	336.09	479.84	565.47	591.41
																																						6.345	-5	-6.5625	-6.875	-5	-0.3125	39.375	153.13	338.13	493.28	560.31	584.84
																																						6.35	-3.125	-0.625	-7.0313	-9.0625	-1.875	36.875	147.5	339.84	495.31	558.13	583.91
																																						6.355	-2.1875	-4.6875	-5	-7.8125	-4.2188	28.281	150.78	339.22	488.13	557.81	584.38
																																						6.36	-5	-4.2188	-2.1875	-4.5313	0.7813	34.375	145.94	337.66	480.78	551.41	576.09
																																						6.365	-4.8438	-4.375	-1.5625	-8.4375	1.5625	30.625	143.91	335.31	484.06	553.59	582.19
																																						6.37	-6.4063	-5	-2.9688	-8.75	-0.625	34.375	144.84	329.38	481.41	552.66	579.22
																																						6.375	-4.2188	-5.4688	-6.0938	-5.4688	-4.6875	33.125	148.13	327.97	489.69	550.94	578.13
																																						6.38	-4.6875	-4.0625	-5.9375	-6.875	-1.875	32.344	141.56	333.28	492.34	550.94	584.38
																																						6.385	-4.5313	-4.6875	-4.6875	-7.6563	-1.4063	37.031	149.06	333.44	487.5	556.09	584.06
																																						6.39	-4.2188	-5.3125	-2.0313	-4.0625	0.625	35	141.72	334.38	485.94	547.5	582.81
																																						6.395	-5.3125	-4.375	-2.9688	-5	2.9688	33.281	133.28	327.66	481.41	550	588.91
																																						6.4	-3.75	-3.9063	-2.3438	-5.625	-0.9375	36.25	141.88	329.22	486.56	548.44	586.72
																																						6.405	-6.7188	-1.4063	-4.6875	-7.1875	-2.3438	34.688	142.19	329.38	479.69	544.38	575.94
																																						6.41	-4.8438	-4.8438	-3.4375	-3.4375	-1.5625	33.75	142.5	330.78	485	545.63	583.13
																																						6.415	-5.7813	-6.25	-4.2188	-4.375	4.8438	34.688	140.94	335.78	479.22	549.84	579.69
																																						6.42	-7.3438	-4.2188	-3.125	-5	1.5625	40.156	148.28	331.88	471.88	556.25	581.41
																																						6.425	-7.6563	-4.375	-2.0313	-7.9688	1.7188	32.813	141.88	337.03	480.94	555.94	585.16
																																						6.43	-8.4375	-3.4375	-2.8125	-5.3125	-0.1563	36.094	136.09	336.88	486.56	550.47	576.72
																																						6.435	-6.7188	-3.9063	-5.1563	-7.1875	-1.4063	35.313	142.34	334.06	479.69	548.59	572.34
																																						6.44	-1.875	-5.9375	-3.2813	-4.375	-1.7188	32.344	136.72	335.78	475.63	557.5	579.06
																																						6.445	-4.5313	-1.7188	-1.875	-4.8438	1.875	36.406	142.81	328.44	480.47	548.75	577.19
																																						6.45	-6.5625	-2.5	-2.9688	-1.875	-1.5625	37.188	145.31	330.16	486.88	550.16	571.88
																																						6.455	-6.875	-2.1875	-3.5938	-3.2813	-2.8125	38.125	144.84	333.13	487.03	544.22	570.78
																																						6.46	-4.6875	-3.5938	-3.4375	-4.8438	-0.3125	37.188	143.28	334.22	489.53	541.09	567.34
																																						6.465	0	-5	-0.9375	-3.75	-1.0938	33.906	144.84	328.44	481.72	537.03	568.13
																																						6.47	-4.5313	-0.7813	-4.375	-3.4375	-1.875	41.094	145.78	333.13	477.66	528.13	565.16
																																						6.475	-3.125	-3.75	-1.5625	-4.0625	1.7188	34.844	145.63	320.63	481.41	531.25	570.94
																																						6.48	-5.625	-4.2188	-2.9688	-7.6563	-2.8125	33.594	142.34	328.91	469.38	533.59	569.06
																																						6.485	-6.5625	-5	-5.625	-10	-3.4375	31.719	148.13	329.84	470.31	532.34	569.06
																																						6.49	-2.1875	-2.5	-5.625	-5.7813	0	29.063	142.66	332.97	472.19	535.94	559.53
																																						6.495	-6.4063	-4.0625	-6.0938	-5	-5	32.031	136.41	328.75	480.31	545.94	564.53
																																						6.5	-5.7813	-5	-3.2813	-6.5625	-0.1563	33.125	139.38	326.72	477.34	545.47	565
																																						6.505	-4.375	-2.0313	-5	-4.8438	-0.625	32.969	135.16	317.34	477.66	541.41	565.47
																																						6.51	-5.4688	-3.4375	-4.0625	-3.4375	-2.5	36.094	138.59	323.44	484.53	548.13	559.38
																																						6.515	-7.1875	-9.6875	-4.375	-5.9375	2.9688	35.156	139.38	321.88	481.41	535.63	564.69
																																						6.52	-6.25	-5.625	-3.125	-5.9375	0.3125	35.469	142.81	328.13	469.84	542.81	564.84
																																						6.525	-5.7813	-3.9063	-2.3438	-5.625	-1.4063	32.188	143.28	322.81	463.75	544.06	564.38
																																						6.53	-5	-3.9063	-2.0313	-4.5313	-2.8125	39.844	144.38	319.84	470.31	547.19	565
																																						6.535	-4.6875	-4.8438	-6.4063	-9.2188	-0.4688	32.188	145.47	315.94	466.25	540.31	560.94
																																						6.54	-3.2813	-7.1875	-5.7813	-5.3125	-4.5313	33.594	145.63	323.91	469.22	541.56	557.66
																																						6.545	-4.8438	-4.5313	-5.9375	-7.1875	-4.2188	34.375	144.06	325.47	469.69	534.84	560.47
																																						6.55	-5.4688	-4.0625	-4.6875	-6.4063	-0.7813	38.281	147.81	319.69	468.13	544.69	557.34
																																						6.555	-4.375	-4.2188	-5.7813	-5.625	-2.8125	33.75	137.19	316.72	466.72	534.84	563.91
																																						6.56	-5.1563	-5	-0.4688	-4.8438	-2.1875	34.219	139.22	319.84	475.63	534.53	557.19
																																						6.565	-4.0625	-4.0625	-3.5938	-6.4063	-1.25	33.281	139.84	328.75	464.84	530.31	552.19
																																						6.57	-6.0938	-2.3438	-3.9063	-6.5625	-1.4063	35	139.84	319.84	467.34	530.94	551.41
																																						6.575	-4.8438	-1.0938	-2.5	-8.125	-4.375	36.563	137.19	322.81	467.81	541.09	552.19
																																						6.58	-6.25	-3.9063	-5	-9.6875	-5	36.406	134.53	324.69	465.16	523.75	553.28
																																						6.585	-2.5	-5	-0.625	-6.4063	-0.1563	37.813	139.06	322.81	462.5	530.63	550.63
																																						6.59	-4.375	-3.2813	-2.1875	-7.1875	-0.3125	37.031	137.97	322.97	464.69	526.88	561.25
																																						6.595	-7.0313	-4.375	-4.6875	-6.7188	0.7813	32.813	139.69	327.66	463.28	527.19	567.97
																																						6.6	-4.0625	-2.5	-0.625	-5	-5	35.156	141.09	322.19	466.09	519.84	563.28
																																						6.605	-2.1875	-7.8125	-4.5313	-4.0625	-4.5313	30.625	138.59	320.78	460.16	526.88	554.38
																																						6.61	-3.2813	-7.5	0	-4.8438	-1.25	29.688	143.44	324.22	463.28	527.81	555.16
																																						6.615	-3.125	-2.1875	-2.0313	-6.7188	-1.5625	35.313	139.22	321.72	455.94	526.25	555
																																						6.62	-0.9375	-5	-1.5625	-5.3125	-2.1875	35.469	139.22	320.78	454.38	526.41	545.63
																																						6.625	-4.0625	-4.6875	-3.2813	-4.5313	-3.5938	33.906	138.13	314.38	454.38	530.31	548.75
																																						6.63	-4.2188	-5	-0.625	-3.2813	-1.4063	33.906	139.38	318.91	460.63	527.5	552.97
																																						6.635	-3.9063	-2.5	-5	-8.75	-2.1875	32.969	142.19	320.47	459.69	528.28	553.75
																																						6.64	-4.0625	-5.7813	-4.5313	-8.2813	-2.1875	36.094	138.28	319.69	464.22	529.38	552.97
																																						6.645	-8.125	-6.5625	-4.2188	-5.625	-2.0313	34.063	137.03	317.81	463.13	516.56	547.66
																																						6.65	-4.8438	-3.5938	-4.8438	-4.6875	-1.25	37.344	144.06	310.94	453.28	511.09	548.59
																																						6.655	-4.5313	-5.1563	-5.3125	-7.3438	-0.625	37.5	139.38	311.56	453.75	515.78	547.19
																																						6.66	-5.625	-3.5938	-3.4375	-7.5	-0.7813	35.781	139.22	310.47	459.38	525.31	539.53
																																						6.665	-4.5313	-3.4375	-2.5	-4.5313	-3.9063	37.813	133.59	309.38	462.34	521.88	537.5
																																						6.67	-2.0313	-4.0625	-2.5	-8.2813	-3.4375	39.688	137.34	309.06	460.31	513.13	538.59
																																						6.675	-3.75	-7.6563	-5	-6.25	-4.5313	35.469	132.66	304.22	465.16	512.81	538.75
																																						6.68	-8.4375	-4.5313	-4.6875	-5.625	-3.4375	33.281	139.22	310.78	463.13	512.81	541.25
																																						6.685	-3.9063	-0.1563	-3.2813	-10.625	0	35	130.63	312.19	460.63	519.06	544.22
																																						6.69	-4.5313	-4.375	-5	-6.5625	-3.2813	33.438	141.56	308.91	454.06	515.16	538.59
																																						6.695	-7.0313	-3.9063	-1.5625	-7.6563	-5	35.469	136.72	310.63	454.38	513.75	544.69
																																						6.7	-4.375	-3.4375	-3.9063	-8.4375	-2.1875	37.813	141.25	314.69	454.22	514.84	535.78
																																						6.705	-7.0313	-4.375	-2.9688	-5.4688	-4.0625	32.344	144.84	316.88	454.84	511.41	539.38
																																						6.71	-7.3438	-3.75	-3.4375	-4.8438	2.3438	37.031	143.13	306.56	444.38	513.75	541.72
																																						6.715	-5.3125	-3.4375	-2.5	-8.125	1.4063	31.875	138.91	317.19	455.16	519.69	542.19
																																						6.72	-4.8438	-3.2813	-3.2813	-2.5	0.4688	30.469	139.84	308.91	452.66	513.44	544.38
																																						6.725	-4.375	-5	-7.0313	-5	-6.875	32.344	137.34	309.22	445.47	518.28	539.38
																																						6.73	-5	-4.2188	-3.9063	-8.125	-0.9375	35.469	144.38	312.34	449.84	513.28	533.91
																																						6.735	-6.7188	-3.4375	-5.625	-7.3438	0.1563	33.438	146.25	315.63	452.19	508.91	536.56
																																						6.74	-2.1875	-1.7188	-2.1875	-5.625	0	33.906	140.47	313.59	453.44	505.31	539.22
																																						6.745	-6.875	-3.125	-4.0625	-4.5313	-1.4063	31.563	141.41	312.34	448.28	513.59	535.94
																																						6.75	-6.25	-3.75	-5	-3.125	-2.5	34.219	138.91	310.63	446.25	511.25	533.91
																																						6.755	-4.2188	-0.1563	-4.2188	-4.8438	-1.7188	32.344	137.66	307.5	448.91	511.56	540.63
																																						6.76	-5.625	-1.25	-2.6563	-4.375	-2.0313	31.875	136.41	310.16	448.59	515	524.84
																																						6.765	-8.9063	-2.5	-5	-6.5625	-1.5625	27.5	130.63	314.84	454.38	512.97	522.97
																																						6.77	-4.375	-0.4688	-4.2188	-2.6563	4.0625	28.75	134.84	313.91	450.47	512.66	525.16
																																						6.775	-5.625	-2.5	-4.0625	-5.1563	-2.6563	32.344	130.78	306.72	444.38	503.91	520.78
																																						6.78	-6.875	-2.0313	-3.2813	-6.4063	0	31.719	133.59	308.91	441.09	504.38	521.72
																																						6.785	-3.5938	-3.75	-5	-5.625	-0.1563	37.656	136.09	299.84	447.03	501.41	525.94
																																						6.79	-4.0625	-1.875	-3.5938	-4.375	-0.1563	37.656	138.91	304.84	444.69	501.41	531.09
																																						6.795	-8.5938	-4.6875	-2.9688	-6.7188	-0.7813	32.656	138.75	305.78	448.44	504.22	536.56
																																						6.8	-6.25	-2.9688	-2.0313	-4.375	0.7813	34.219	143.75	304.53	442.81	505.47	528.13
																																						6.805	-6.875	-1.875	-5.4688	-5.3125	-2.5	35.313	141.41	303.59	442.19	508.91	532.66
																																						6.81	-5.1563	-7.0313	-6.25	-0.625	4.6875	35.313	137.34	303.59	443.44	503.13	528.13
																																						6.815	-6.4063	-5.9375	-5.7813	-1.875	0.4688	37.031	135.47	309.69	446.41	505	532.5
																																						6.82	-4.0625	-6.5625	-5	-4.6875	-1.0938	33.438	131.56	309.69	439.38	493.75	524.06
																																						6.825	-4.375	-3.9063	-2.9688	-8.4375	-5.625	37.031	129.84	304.38	440.78	494.53	535.63
																																						6.83	-2.3438	-4.5313	-2.6563	-5.9375	-1.875	35.469	137.5	311.72	443.28	493.59	531.41
																																						6.835	-1.875	-3.4375	-7.3438	-2.5	-2.0313	36.563	137.19	304.69	444.06	494.06	527.66
																																						6.84	-3.125	-2.1875	-3.125	-6.7188	-0.625	34.531	135.31	304.69	441.09	490.31	528.13
																																						6.845	-6.5625	-3.4375	-5	-5	3.9063	34.531	136.41	309.38	448.28	492.34	524.53
																																						6.85	-4.8438	-3.5938	-3.5938	-3.4375	-2.5	29.844	129.38	309.06	442.81	498.59	526.72
																																						6.855	-6.25	-3.75	-2.1875	-5.3125	-1.25	34.844	129.69	305.31	434.84	493.75	521.72
																																						6.86	-5.4688	-4.375	-4.6875	-5.9375	1.4063	35	126.41	308.13	432.81	486.88	524.22
																																						6.865	-6.5625	-5.625	-4.6875	-2.9688	1.4063	34.531	131.41	303.91	435.31	495.94	518.28
																																						6.87	-3.9063	-2.9688	-2.3438	-3.5938	0.9375	35	135.63	302.66	440.31	496.88	512.66
																																						6.875	-2.0313	-4.0625	-3.75	-6.25	-3.125	37.813	137.97	308.44	430.63	495.31	513.44
																																						6.88	-0.4688	-2.5	-1.0938	-2.5	0	35.469	137.19	309.22	439.38	494.38	524.69
																																						6.885	-2.8125	-2.9688	-5.3125	-3.125	-1.875	35.469	129.38	304.53	437.81	496.88	511.88
																																						6.89	-2.9688	-2.9688	-1.0938	-3.75	-1.5625	32.813	132.19	303.59	442.03	495.63	519.84
																																						6.895	-6.25	-2.6563	-0.625	-5.3125	1.0938	32.5	133.91	303.59	430.78	492.34	512.81
																																						6.9	-2.0313	-6.7188	-2.1875	-5	-0.9375	31.719	138.75	307.5	431.72	497.5	513.44
																																						6.905	-6.4063	-6.7188	-1.7188	-4.6875	-2.5	32.813	132.34	311.56	430	496.72	515.78
																																						6.91	-3.75	-2.5	-0.625	-4.375	1.875	34.063	132.34	306.56	434.84	493.91	509.84
																																						6.915	-5.4688	-2.1875	-3.5938	-4.0625	-2.1875	36.563	122.81	310.63	438.59	498.59	517.5
																																						6.92	-5.625	-2.6563	-2.5	-4.6875	0.4688	30.156	129.84	302.34	437.34	489.84	513.44
																																						6.925	-3.2813	-4.5313	-5	-7.8125	-2.3438	35.156	131.25	301.41	439.69	498.44	510.16
																																						6.93	-2.5	-5.7813	-3.5938	-2.6563	2.0313	36.719	132.34	301.56	431.41	502.5	518.59
																																						6.935	-4.375	-3.75	-5.4688	-5.625	-1.7188	33.75	139.06	300.94	430.47	497.81	509.69
																																						6.94	-5	-5	-1.4063	-4.375	4.2188	35.625	138.59	297.97	430.63	485.78	508.59
																																						6.945	-6.7188	-2.5	-3.9063	-3.4375	4.0625	37.5	137.19	301.25	431.56	490.31	514.22
																																						6.95	-4.0625	-3.75	-4.6875	-3.5938	3.4375	34.531	140.31	305.31	431.41	485.94	509.84
																																						6.955	-2.3438	-3.5938	-2.1875	-4.8438	-0.1563	38.438	132.81	301.56	431.09	482.81	516.09
																																						6.96	-4.2188	-3.125	-3.5938	-6.25	2.3438	39.375	128.75	305.63	429.38	483.91	510.47
																																						6.965	-4.8438	-3.9063	-3.2813	-2.1875	4.2188	34.844	129.69	300.31	441.25	481.41	516.72
																																						6.97	-5	-4.5313	-3.75	-4.5313	1.25	31.719	131.88	305	426.56	485.78	518.44
																																						6.975	-3.5938	-2.3438	-5.1563	-7.1875	3.75	31.406	132.03	296.72	419.06	482.34	512.34
																																						6.98	-2.8125	-4.2188	-5.4688	-2.8125	-2.0313	32.813	131.09	296.41	420.94	481.88	521.25
																																						6.985	-3.5938	-7.0313	-4.6875	-1.7188	-1.25	31.25	127.81	296.09	425.16	486.41	519.84
																																						6.99	-5.9375	-1.7188	-5	-5.7813	0.3125	37.656	130.78	299.69	417.66	490.63	516.72
																																						6.995	-6.7188	-4.6875	-4.6875	-8.2813	-1.5625	34.219	130.47	290.94	425.31	495.16	508.28
																																						7	-2.8125	-3.125	-4.5313	-1.5625	2.1875	42.5	135.16	289.22	419.38	486.88	520.31
																																						7.005	-5	-3.9063	-5.3125	-6.4063	0.625	31.719	133.75	291.72	430.78	484.84	515.63
																																						7.01	-5.7813	-4.0625	-1.7188	-3.125	0.4688	37.969	135.78	296.25	428.28	488.44	516.25
																																						7.015	-2.9688	-7.0313	-5.3125	-6.25	-1.0938	35.625	133.59	288.44	425.78	484.84	512.81
																																						7.02	-6.875	-2.0313	-2.8125	-8.9063	2.3438	32.344	136.72	290.31	422.97	483.59	512.81
																																						7.025	-8.5938	-4.2188	-2.5	-4.375	0.7813	31.406	132.34	289.38	420.16	481.72	511.88
																																						7.03	-3.9063	-2.9688	-3.9063	-8.5938	2.3438	35.781	139.22	291.56	415.47	483.44	510.78
																																						7.035	-3.75	-3.5938	-5.625	-3.2813	0	35.469	136.56	296.72	415.16	491.09	503.44
																																						7.04	-3.125	-1.4063	-4.375	-6.25	0.3125	32.344	136.72	296.56	413.59	491.41	502.5
																																						7.045	-3.2813	-5.3125	-3.9063	-4.8438	2.0313	33.75	134.69	290.63	412.19	495.16	501.25
																																						7.05	-4.2188	-3.75	-5.9375	-4.2188	3.9063	34.531	131.88	295.78	416.56	493.44	505.31
																																						7.055	-5.625	-3.5938	-3.9063	-5.7813	0	35.156	133.13	297.97	420.94	498.75	512.03
																																						7.06	-6.0938	-6.25	-5.4688	-7.6563	0.3125	37.656	132.34	304.53	421.72	486.41	505.78
																																						7.065	-6.4063	-4.0625	-4.6875	-6.7188	-3.9063	33.906	132.66	297.03	418.91	483.28	508.91
																																						7.07	-9.5313	1.0938	-2.5	-4.2188	-3.9063	36.563	129.84	295.16	421.25	477.19	505.63
																																						7.075	-6.7188	-0.3125	-4.5313	-3.125	-3.2813	34.531	131.09	289.69	412.81	475.78	508.91
																																						7.08	-7.0313	-5	-4.375	-4.6875	0	35.156	130.47	281.88	417.19	481.09	504.38
																																						7.085	-2.3438	-4.375	-3.4375	-5.625	1.7188	34.688	128.44	287.81	423.44	472.34	493.91
																																						7.09	-3.75	-2.5	-4.8438	-7.5	-0.3125	35.625	129.84	285.47	420	470	494.22
																																						7.095	-6.25	-4.6875	-4.2188	-4.2188	-3.5938	35.938	131.88	282.66	422.34	469.84	491.56
																																						7.1	-1.25	-3.2813	-3.2813	-1.875	-1.25	32.969	129.53	294.53	416.56	465.78	492.97
																																						7.105	-4.5313	-3.2813	-5.3125	-4.8438	2.1875	34.063	129.53	291.88	415	467.34	491.41
																																						7.11	-3.4375	-2.1875	-4.2188	-9.2188	-1.7188	37.656	130.31	294.22	414.69	468.28	494.84
																																						7.115	-4.5313	-2.6563	-7.5	-0.4688	-3.5938	34.063	132.34	291.09	406.41	462.34	496.25
																																						7.12	-5.7813	-3.125	-1.25	-3.4375	-1.5625	37.5	129.06	296.25	407.03	467.81	498.75
																																						7.125	-3.9063	-2.3438	-3.9063	-3.125	-4.375	38.75	127.19	290.31	407.66	472.66	490.16
																																						7.13	-5.3125	-2.9688	-4.0625	-4.6875	0.4688	31.094	134.06	297.97	408.44	472.03	495.78
																																						7.135	-5	-2.3438	-2.3438	-4.8438	-2.8125	35	131.56	290.16	409.53	472.66	494.38
																																						7.14	-4.0625	-1.875	-2.0313	-1.5625	0.7813	37.813	132.03	294.06	409.84	469.06	488.28
																																						7.145	-4.6875	-1.0938	-0.4688	-5.625	-0.625	36.719	127.34	288.44	403.13	474.22	490.78
																																						7.15	-5.7813	-3.75	-5	-7.1875	0.1563	36.094	131.88	292.97	404.84	473.28	484.53
																																						7.155	-6.0938	-3.2813	-2.1875	-5.7813	0.9375	34.219	133.28	292.5	403.44	461.41	484.06
																																						7.16	-2.9688	-2.8125	-0.7813	-7.6563	1.0938	39.063	130.94	291.41	407.5	461.88	487.5
																																						7.165	-2.3438	-0.3125	-2.8125	-8.125	-2.5	33.438	128.59	300.31	410.31	471.09	487.34
																																						7.17	-3.4375	-2.1875	-4.5313	-3.125	-1.5625	32.344	129.69	291.25	408.75	469.53	487.81
																																						7.175	-5.3125	-4.2188	-2.0313	-4.5313	-0.3125	33.281	134.84	285.78	409.06	470.47	487.66
																																						7.18	-4.0625	-0.1563	-2.5	-5.7813	4.375	29.844	132.34	291.41	411.25	474.84	492.34
																																						7.185	-4.375	-1.0938	-4.5313	-1.5625	2.6563	29.688	134.69	295	419.38	471.88	480.47
																																						7.19	-4.375	-0.1563	-4.0625	-1.7188	2.1875	32.656	135.16	296.09	415.94	471.56	490.47
																																						7.195	-3.4375	-2.1875	-3.9063	-6.875	3.125	31.875	133.75	290	420.78	472.5	490.63
																																						7.2	-4.0625	-4.8438	-3.75	-1.25	-1.5625	34.219	132.34	282.34	409.53	462.34	485.31
																																						7.205	-6.5625	-4.5313	-0.1563	-4.375	0	29.688	132.5	281.25	403.13	467.81	475.31
																																						7.21	-4.6875	-4.5313	-2.3438	-7.3438	1.875	33.594	125.63	280	409.38	469.38	484.69
																																						7.215	-7.6563	-3.2813	-3.2813	-4.2188	-0.4688	32.656	126.25	293.75	406.56	474.06	481.56
																																						7.22	-5.7813	-3.75	0	-5.9375	0.7813	34.844	128.44	287.19	400.78	464.06	487.03
																																						7.225	-5.1563	-5.1563	-0.4688	-4.2188	-1.7188	36.719	129.38	286.09	405.63	468.75	484.22
																																						7.23	-5.1563	-2.5	-4.0625	-5.4688	1.0938	34.219	133.59	284.53	410.78	466.25	485.94
																																						7.235	-4.5313	-4.375	0.7813	-2.8125	2.9688	32.813	130.47	283.91	410.47	469.53	476.72
																																						7.24	-4.8438	-2.8125	-2.0313	-2.5	2.3438	35.938	124.84	281.25	406.72	461.56	481.09
																																						7.245	-1.5625	-3.2813	-1.875	-6.5625	-1.25	40.313	128.91	282.34	407.97	465.16	483.28
																																						7.25	-4.0625	-2.0313	-0.4688	-5.9375	2.1875	35.469	124.69	285	398.91	457.81	492.34
																																						7.255	-7.1875	-0.3125	-1.0938	-5.625	0.3125	33.594	125.47	280.63	410.31	458.28	481.25
																																						7.26	-4.5313	-2.1875	-5.9375	-7.5	-0.1563	33.438	125.94	282.81	409.69	462.34	483.13
																																						7.265	-6.4063	-0.625	-2.9688	-6.5625	0.7813	35.313	125.31	284.22	404.22	463.75	482.5
																																						7.27	-1.5625	-0.7813	-3.2813	-6.875	-0.9375	30.156	132.81	286.09	405.63	463.91	481.88
																																						7.275	-1.0938	-1.0938	-2.8125	-6.0938	-0.1563	28.906	127.34	281.25	401.72	465.16	485.31
																																						7.28	-6.0938	-3.125	-2.5	-7.3438	4.375	33.75	134.06	284.22	409.69	456.72	483.59
																																						7.285	-0.625	-2.8125	-3.4375	0.1563	0.9375	32.813	126.25	279.06	406.56	458.75	489.53
																																						7.29	-4.2188	-5	-4.2188	-5	1.0938	33.438	127.19	281.72	410.94	457.81	478.75
																																						7.295	-1.7188	-3.5938	-4.6875	-4.2188	-3.125	31.25	122.81	280.94	404.84	463.75	473.91
																																						7.3	-4.2188	-2.0313	-7.6563	-9.375	1.4063	33.281	126.56	281.72	402.19	459.84	471.72
																																						7.305	-2.0313	-2.5	-3.5938	-5.3125	1.4063	31.563	125.31	277.03	400.78	457.81	474.53
																																						7.31	-4.2188	-5	-3.125	-7.5	3.2813	33.594	122.97	277.81	393.44	462.97	474.84
																																						7.315	-2.8125	-4.2188	-6.25	-3.125	1.0938	34.375	118.75	287.81	400.63	454.84	481.88
																																						7.32	-3.75	-2.9688	-5	-2.3438	-0.3125	28.594	122.34	273.59	395	464.53	479.22
																																						7.325	-3.9063	1.0938	-1.0938	-4.0625	1.5625	34.063	121.56	277.5	396.56	461.09	480.47
																																						7.33	-5	-4.375	-1.25	-5.4688	1.0938	32.031	122.19	276.09	395.94	462.97	485.78
																																						7.335	-4.6875	-1.875	-1.7188	-2.5	2.0313	30.781	122.34	283.44	397.66	460.94	483.91
																																						7.34	-6.875	-4.2188	-4.8438	-1.5625	3.9063	32.813	126.25	285.47	391.41	454.84	470
																																						7.345	-2.9688	-0.1563	-3.2813	-4.2188	-0.3125	35.156	129.69	280.78	384.22	462.03	472.5
																																						7.35	-3.9063	-0.625	-2.8125	-3.4375	-1.4063	34.531	129.38	282.97	388.44	462.81	469.06
																																						7.355	-2.0313	-1.4063	-5.625	-6.0938	0.4688	31.094	127.03	283.44	399.06	459.06	470
																																						7.36	-2.3438	-4.0625	-4.2188	-5.3125	0.625	29.375	127.97	279.38	390.63	456.41	466.41
																																						7.365	-5.625	-3.4375	-2.0313	-6.875	-0.625	33.594	130.47	283.28	393.28	445.63	475
																																						7.37	-4.6875	-0.3125	-1.4063	-3.5938	-0.9375	28.125	125.16	283.13	390.31	444.84	470.16
																																						7.375	-2.3438	-1.0938	-1.875	-6.4063	1.5625	35.781	127.34	277.19	400.47	439.22	473.13
																																						7.38	-2.5	-0.3125	-2.0313	-9.0625	-0.9375	27.031	124.06	285	394.38	448.75	472.34
																																						7.385	-3.2813	-3.125	-3.75	-3.125	1.5625	31.563	122.03	278.44	390	451.56	468.75
																																						7.39	-1.0938	-1.0938	-2.9688	-5	2.9688	29.063	120.94	272.19	391.41	445.47	478.91
																																						7.395	-2.0313	-4.2188	-0.7813	-7.8125	0	34.531	125.47	272.19	395.94	452.34	474.38
																																						7.4	-3.2813	-0.9375	-0.9375	-7.3438	1.875	35.469	129.06	280	394.06	448.59	470.94
																																						7.405	-2.0313	-2.5	-2.3438	-5	-0.9375	35.781	129.22	273.44	397.34	445.47	470.78
																																						7.41	-2.5	-2.1875	-3.4375	-1.4063	-0.1563	32.5	125.47	273.13	395.78	456.09	476.88
																																						7.415	-3.4375	-2.5	-3.125	-5.625	-2.0313	34.531	124.69	281.88	389.06	450.16	469.22
																																						7.42	-4.375	-1.5625	-4.375	-3.2813	-2.0313	32.969	126.56	288.44	384.84	443.59	472.66
																																						7.425	-4.0625	-2.9688	-1.7188	-2.8125	-0.1563	29.844	119.84	279.69	387.5	445.78	466.41
																																						7.43	-2.5	-6.4063	-3.125	-2.1875	-2.3438	28.594	117.97	275.78	388.75	445.47	470.16
																																						7.435	-0.3125	-3.5938	-4.375	-7.3438	-1.875	32.031	121.72	272.81	388.75	446.25	472.97
																																						7.44	-3.125	-1.25	-0.4688	-5.9375	-1.0938	33.125	128.59	266.88	387.5	443.13	467.34
																																						7.445	-2.9688	-2.8125	-3.9063	0.3125	1.7188	30.781	126.72	275.94	389.53	430.16	461.72
																																						7.45	-5.625	-1.25	-5.1563	0.7813	-0.1563	33.281	126.09	275	390.63	442.34	464.38
																																						7.455	-4.375	0	0.7813	-3.4375	0	35.625	128.28	276.88	395.63	441.25	457.97
																																						7.46	-2.3438	-2.0313	-2.3438	-3.2813	2.6563	30.781	128.13	270.78	398.44	440.63	460.78
																																						7.465	-3.125	-0.4688	-2.0313	-4.6875	-0.3125	30.625	128.44	275.94	390	441.88	452.81
																																						7.47	-4.6875	-1.5625	-2.0313	-3.4375	-0.4688	29.531	124.53	282.97	384.84	434.06	455
																																						7.475	-1.25	-2.6563	-3.2813	-4.375	-3.125	32.813	122.81	283.59	392.97	440.31	460.16
																																						7.48	-5.3125	-1.7188	0	-3.2813	-1.25	35.781	122.03	284.53	397.19	443.59	464.53
																																						7.485	-0.7813	-0.3125	-3.4375	-2.5	-1.25	33.594	125.78	284.84	389.38	446.56	466.09
																																						7.49	-8.5938	-3.75	-7.1875	-3.125	1.875	31.094	125.16	280.31	395.78	445.31	463.91
																																						7.495	-7.0313	-3.4375	-1.0938	-6.875	-1.25	30	124.53	278.91	396.72	445.78	467.97
																																						7.5	-5.625	-1.25	2.0313	-3.75	0.625	33.75	123.91	278.91	391.72	442.34	475.94
																																						7.505	-3.9063	-0.625	-3.75	-4.2188	-2.5	34.375	121.72	271.88	383.28	442.03	470
																																						7.51	-1.7188	-2.9688	-3.125	-8.75	-1.0938	36.406	131.25	275.78	383.28	434.06	472.34
																																						7.515	-4.0625	-1.5625	-0.7813	-3.9063	-1.7188	32.188	127.81	282.97	386.56	439.06	472.19
																																						7.52	-4.6875	-1.4063	-3.75	-2.5	1.0938	30.156	124.38	279.84	383.59	441.56	470.94
																																						7.525	-4.5313	-0.4688	-4.5313	-4.5313	0.7813	32.969	129.84	271.88	380.16	439.22	469.69
																																						7.53	-3.75	-2.0313	-3.125	-3.2813	1.4063	35.625	124.69	273.75	381.88	443.91	470.63
																																						7.535	-1.5625	-2.5	-2.5	-6.25	-1.0938	36.25	124.84	276.88	379.53	434.84	462.97
																																						7.54	-4.0625	-1.875	-2.8125	-3.4375	-0.1563	34.219	122.97	275.78	377.03	439.69	457.03
																																						7.545	-4.375	0	-4.2188	-5.7813	-1.4063	35.938	126.09	278.44	384.84	439.69	461.56
																																						7.55	-2.8125	-0.1563	-2.1875	-6.875	3.125	33.125	124.06	271.88	385.47	438.44	457.81
																																						7.555	-5.9375	-1.7188	-5	-2.8125	3.2813	34.219	119.53	280.31	389.38	431.09	455.78
																																						7.56	-2.1875	-2.3438	-2.5	-5	-0.625	32.344	120.94	280.47	385.63	437.03	455.16
																																						7.565	-3.4375	0	-3.2813	-7.1875	6.875	30.469	121.56	279.06	383.59	437.34	449.84
																																						7.57	-3.4375	2.1875	-0.7813	-7.8125	0.625	32.344	121.72	275.63	379.38	437.5	452.34
																																						7.575	-1.875	-1.0938	-2.8125	-6.4063	1.875	31.719	121.09	275.78	375.31	431.88	456.41
																																						7.58	-5.9375	-0.7813	-1.7188	-4.375	0.3125	31.25	119.53	272.5	379.69	433.59	457.66
																																						7.585	-1.5625	-0.4688	-3.4375	-3.9063	-1.5625	26.094	127.19	275	384.38	435.47	453.28
																																						7.59	-5.1563	0.7813	-5	-4.2188	-0.9375	27.344	127.81	273.91	378.44	435.63	454.06
																																						7.595	0.7813	-2.5	-5	-4.6875	1.4063	32.813	127.5	274.22	381.88	430.47	460.63
																																						7.6	-7.0313	-1.0938	0	-4.8438	0.9375	32.5	129.38	275.63	379.06	431.09	457.03
																																						7.605	-3.4375	-3.75	-3.2813	-4.5313	-3.2813	31.094	130.16	273.59	376.09	438.44	457.5
																																						7.61	-4.0625	-0.9375	-2.0313	-8.125	-1.5625	35.469	123.75	278.44	378.28	432.97	453.91
																																						7.615	-2.5	-1.875	-1.25	-1.0938	-0.9375	29.844	120.16	278.44	376.72	421.56	452.03
																																						7.62	-4.2188	-3.2813	-2.1875	-2.1875	0.7813	27.344	127.34	284.84	374.84	432.03	446.72
																																						7.625	-4.2188	-2.3438	-2.1875	-3.4375	-1.0938	32.344	126.25	276.41	377.19	431.56	448.75
																																						7.63	-1.7188	-0.3125	-2.3438	-6.25	0	27.813	122.66	278.28	377.5	422.66	455.78
																																						7.635	-3.2813	-1.0938	-2.9688	-3.75	0.7813	33.75	125.78	271.88	381.41	424.38	458.13
																																						7.64	1.7188	-1.7188	-2.8125	-4.6875	-0.4688	34.063	125.63	275	378.75	424.53	454.69
																																						7.645	-3.5938	-5	-3.4375	-5.7813	0.3125	30.469	128.59	266.72	379.22	430.16	458.75
																																						7.65	-1.875	1.4063	3.2813	-6.25	-0.7813	28.906	131.56	276.25	383.59	432.03	454.84
																																						7.655	-2.8125	-0.4688	-4.375	-7.3438	0.7813	26.094	123.91	271.72	379.53	425.16	454.06
																																						7.66	-3.2813	-2.6563	1.0938	-6.875	-0.7813	30.781	125	273.13	380	428.59	452.97
																																						7.665	-5.3125	-2.6563	-5.4688	-4.8438	0	26.25	120.78	273.59	380.78	435.63	448.44
																																						7.67	-3.9063	-3.5938	-4.6875	-2.6563	-1.0938	30.781	125.78	272.81	379.22	425.47	452.19
																																						7.675	-5.1563	-1.25	0.4688	-3.2813	-0.9375	35	123.75	264.06	379.53	417.34	448.28
																																						7.68	-2.0313	-0.625	-5	-2.1875	-2.0313	34.844	121.88	261.25	380.31	426.88	454.38
																																						7.685	-2.8125	-2.5	-3.75	-2.0313	2.1875	32.344	122.81	266.09	375.78	422.81	445.63
																																						7.69	-2.1875	-2.5	-4.2188	-6.5625	-0.7813	31.094	124.53	272.97	369.69	424.22	448.13
																																						7.695	-4.375	-2.6563	-2.9688	-1.25	-3.5938	35	123.13	267.5	377.5	433.75	446.56
																																						7.7	-2.3438	-7.6563	-2.0313	-3.125	-1.4063	31.406	119.53	268.44	376.09	429.06	452.19
																																						7.705	-1.5625	-2.3438	-8.4375	-2.3438	0.9375	34.219	118.28	269.84	384.22	431.41	452.03
																																						7.71	-0.1563	-4.5313	-3.9063	-1.7188	2.0313	33.281	122.03	269.38	376.09	426.88	445.94
																																						7.715	-5.4688	-4.2188	-1.0938	-2.5	1.25	33.75	117.97	271.25	379.69	424.53	453.75
																																						7.72	-2.5	-1.7188	-1.25	-7.8125	3.5938	29.375	121.88	267.03	365.31	430	452.81
																																						7.725	-7.5	-2.3438	-2.9688	-4.6875	-0.3125	34.688	118.44	263.91	369.84	423.13	451.72
																																						7.73	-3.9063	-3.75	-2.3438	-6.5625	0.3125	30.313	119.69	263.28	379.06	426.56	453.75
																																						7.735	-2.0313	-3.4375	-1.7188	-4.2188	-2.0313	31.719	120	266.09	380.78	416.88	447.66
																																						7.74	-3.2813	-1.25	-2.0313	-4.5313	-4.2188	31.25	116.88	264.69	367.97	425.31	446.41
																																						7.745	0	-4.5313	-2.0313	-5.4688	0.625	33.125	116.25	273.13	367.19	426.25	449.38
																																						7.75	0.7813	-0.9375	-0.3125	-6.0938	2.3438	35.781	123.75	268.91	363.44	436.88	449.53
																																						7.755	-1.4063	-3.4375	-2.9688	-0.1563	1.5625	36.406	121.25	268.59	367.97	428.59	445.63
																																						7.76	-1.7188	-3.75	-0.7813	-4.5313	-0.7813	32.188	127.03	266.72	375.63	426.72	441.25
																																						7.765	-4.8438	-0.7813	0.3125	0	2.8125	33.438	120	268.44	377.19	426.56	439.06
																																						7.77	-1.5625	-3.5938	0.625	-3.9063	4.5313	32.188	127.66	273.75	370.31	430	436.72
																																						7.775	-1.5625	-2.8125	-2.9688	-6.25	2.0313	30.313	121.25	262.5	381.72	415.16	438.44
																																						7.78	-1.25	-0.7813	-0.1563	-0.7813	0.1563	36.719	112.81	262.19	380.16	421.56	444.53
																																						7.785	-4.375	-3.75	-3.2813	-1.875	1.4063	31.875	122.97	259.84	370.78	417.5	442.03
																																						7.79	-4.6875	-2.5	2.8125	-4.6875	2.0313	33.438	120.94	257.97	372.03	417.03	445
																																						7.795	-3.4375	-2.5	0.4688	-1.875	-0.1563	32.969	119.53	261.88	371.56	423.28	435
																																						7.8	-3.125	-0.1563	-0.9375	-3.75	-1.875	32.813	123.28	262.66	369.22	422.34	438.44
																																						7.805	-4.0625	-0.9375	-5.3125	-1.875	-1.7188	32.344	122.97	267.81	355.16	427.81	434.22
																																						7.81	-4.6875	-3.9063	0	-3.125	5.9375	31.094	117.34	265.16	360.94	425.63	431.09
																																						7.815	-0.9375	-1.875	-4.375	-5	0	33.438	116.56	268.75	361.41	423.44	440.47
																																						7.82	-2.6563	-3.4375	-2.8125	-1.0938	-2.1875	28.75	113.91	261.72	360.31	426.56	438.44
																																						7.825	-2.1875	-2.8125	-2.1875	-3.2813	-2.3438	29.375	115.47	261.09	373.13	417.03	431.41
																																						7.83	-3.75	0.1563	-0.9375	-5	2.0313	31.406	117.34	270.94	368.75	425.16	444.53
																																						7.835	-1.5625	-5.4688	-2.1875	-1.5625	1.25	31.094	121.09	271.56	370	424.84	439.84
																																						7.84	-3.9063	-2.5	-5	-3.2813	-0.9375	32.5	124.53	262.03	376.09	422.66	438.13
																																						7.845	0.3125	-1.5625	-1.4063	-1.0938	1.875	30.625	120.63	262.5	369.38	416.56	432.03
																																						7.85	0.1563	-2.0313	-2.5	-4.375	1.25	29.219	122.5	268.91	376.25	425.94	429.38
																																						7.855	-2.3438	-1.5625	-0.625	-3.9063	0.625	32.5	126.72	263.75	365.31	418.75	431.72
																																						7.86	-0.4688	-2.8125	-4.0625	-6.4063	0	30	122.66	265.16	377.03	419.22	435.63
																																						7.865	-2.8125	0.7813	-2.0313	-2.3438	3.5938	28.125	119.38	261.25	369.22	412.66	434.22
																																						7.87	-3.2813	-2.3438	-3.2813	-3.5938	1.5625	31.25	117.81	258.28	364.69	411.25	432.5
																																						7.875	-1.25	-2.5	-1.0938	-2.8125	3.75	29.531	123.44	269.69	367.03	405.63	428.44
																																						7.88	-0.1563	-1.25	-1.25	-6.0938	1.5625	34.063	122.34	268.28	363.91	416.09	432.66
																																						7.885	-3.5938	-2.0313	-1.4063	-4.8438	2.1875	29.688	124.38	263.75	371.25	420	439.69
																																						7.89	2.5	-1.875	-5	-1.0938	0.7813	30	124.69	266.72	364.06	415.78	437.81
																																						7.895	-5.625	0.4688	2.8125	-7.0313	2.0313	27.813	121.88	264.06	372.81	410.47	439.22
																																						7.9	-5.4688	-0.4688	-0.1563	-2.5	0.625	30.625	127.34	267.19	376.25	416.41	435.78
																																						7.905	-1.4063	-0.7813	0.3125	-3.5938	1.875	28.75	127.34	264.53	374.53	412.03	444.06
																																						7.91	-1.0938	-3.5938	-3.5938	-5.625	-1.0938	31.875	118.75	266.56	372.97	409.53	446.25
																																						7.915	-0.4688	-1.25	-2.0313	-5.1563	1.875	30.781	118.75	263.91	376.88	411.88	441.56
																																						7.92	-2.8125	-0.1563	-4.5313	-8.5938	0.7813	27.5	119.22	265.16	358.75	415.47	437.97
																																						7.925	-0.7813	-3.75	-2.3438	-4.6875	-0.3125	30.156	114.84	263.91	365.31	415.16	433.75
																																						7.93	-3.125	-2.3438	-3.4375	-5.4688	0.9375	30.313	112.81	262.81	364.22	410.78	433.44
																																						7.935	-3.9063	-2.1875	1.7188	-4.6875	-2.1875	30.938	116.41	266.09	366.88	410.16	436.25
																																						7.94	-4.0625	-1.7188	-3.9063	-2.1875	-2.1875	29.688	112.19	262.34	365.94	412.81	440.63
																																						7.945	0.9375	-1.4063	-5	-1.0938	3.4375	29.688	114.84	263.44	363.44	400.94	434.06
																																						7.95	-2.6563	-3.2813	-0.7813	-4.0625	-2.8125	31.406	112.34	261.41	360.31	406.41	434.38
																																						7.955	-3.9063	-2.8125	-0.9375	-4.0625	0.9375	31.719	119.84	263.75	355.63	404.38	430.94
																																						7.96	-2.8125	-1.7188	-4.6875	-5.625	3.9063	32.813	118.59	252.81	358.44	406.25	430.63
																																						7.965	1.5625	-3.4375	-4.375	-2.3438	3.9063	32.344	120.94	255.47	359.22	408.44	429.38
																																						7.97	-4.2188	-0.7813	-0.3125	-4.5313	3.125	30.156	120.16	256.88	363.28	409.06	423.28
																																						7.975	-1.7188	-3.9063	-2.0313	-4.375	1.5625	30	121.88	258.44	363.28	412.66	427.97
																																						7.98	-3.125	-5	-0.9375	1.7188	1.0938	27.813	116.56	268.91	362.19	405	425.78
																																						7.985	-2.3438	-1.7188	1.5625	-0.625	3.2813	27.969	121.41	264.84	356.41	408.91	421.41
																																						7.99	-2.5	-6.875	-1.25	-0.3125	1.7188	23.281	120.16	256.72	353.91	408.91	425
																																						7.995	-1.7188	-2.5	-3.5938	-1.0938	3.5938	28.906	116.56	261.88	355.78	407.03	423.91
																																						8	-3.9063	0.3125	-2.5	-2.1875	2.6563	28.75	121.88	252.34	357.97	402.66	419.38
																																						8.005	-1.5625	-3.75	-0.625	-1.4063	3.4375	31.406	120.78	258.91	346.41	401.25	430.16
																																						8.01	0	-2.5	-4.375	-4.375	3.4375	30.156	114.84	268.75	356.88	398.13	431.56
																																						8.015	-1.25	-5.4688	-3.9063	-2.6563	0.1563	32.031	119.06	268.44	357.03	405.94	425
																																						8.02	-2.5	-4.5313	-0.9375	-4.8438	-2.8125	28.281	124.84	265.16	359.53	404.38	435.16
																																						8.025	-2.0313	-2.8125	-0.7813	-2.1875	3.2813	32.344	121.88	257.5	357.34	408.44	426.72
																																						8.03	-6.875	0.4688	-1.4063	-2.3438	1.0938	27.969	118.91	256.25	362.03	401.56	426.88
																																						8.035	-0.7813	0	0.7813	-4.8438	2.9688	35.781	122.19	263.59	358.75	401.88	433.75
																																						8.04	-2.1875	1.0938	0.3125	-4.6875	4.0625	33.906	117.34	268.59	361.09	408.59	425.78
																																						8.045	1.0938	-0.625	-0.7813	-4.0625	2.8125	32.813	118.91	263.44	362.19	409.53	426.56
																																						8.05	-4.6875	0.4688	-1.5625	-4.2188	-2.5	31.563	115.63	260.63	355.47	418.59	422.34
																																						8.055	-4.2188	-2.5	-3.5938	-5.625	0.3125	32.188	116.72	254.22	358.75	412.34	420.31
																																						8.06	-3.9063	-4.0625	-2.9688	-5	3.9063	33.438	117.34	257.66	355.94	407.66	420
																																						8.065	-0.3125	-2.8125	-1.875	-1.875	2.1875	30.781	113.28	254.06	355.94	411.88	421.88
																																						8.07	-0.625	-0.3125	-0.9375	-3.125	-1.0938	29.844	117.34	256.09	361.09	404.84	422.34
																																						8.075	-4.5313	-1.25	-1.7188	-7.6563	2.0313	32.969	116.56	246.56	360.31	402.19	421.72
																																						8.08	-1.7188	-2.1875	0.9375	-4.2188	-0.4688	34.688	114.22	248.75	359.84	404.22	432.66
																																						8.085	-2.8125	1.0938	1.5625	-2.1875	2.5	27.969	113.44	254.38	360.78	401.09	424.53
																																						8.09	0	-1.5625	0.625	-1.4063	0.3125	29.375	120.63	254.53	362.34	409.69	422.03
																																						8.095	0.9375	-2.6563	-0.1563	-0.625	1.25	28.281	125.94	257.34	363.75	403.75	427.66
																																						8.1	-4.375	-0.625	0.9375	-3.4375	2.8125	26.719	119.53	255.16	360.47	403.44	430.16
																																						8.105	1.0938	-0.9375	0.625	-4.2188	4.0625	33.906	121.09	253.75	361.09	405.78	433.91
																																						8.11	-0.9375	-0.625	-3.9063	-5.9375	-4.6875	29.531	120.16	252.03	353.13	405	432.34
																																						8.115	-1.25	-0.4688	0.4688	-5	4.6875	32.813	118.28	259.69	354.84	405.16	430.16
																																						8.12	-2.3438	2.8125	-0.9375	-5.625	1.7188	27.656	117.19	255.47	352.81	405.78	425.78
																																						8.125	-2.3438	-1.875	-3.9063	-6.25	1.0938	29.375	121.09	253.28	355.63	410	418.91
																																						8.13	-3.125	1.0938	0.7813	-8.9063	2.3438	31.875	114.69	256.56	349.22	411.09	422.81
																																						8.135	-2.6563	-2.1875	0	-5.4688	-1.0938	28.281	119.84	255.16	352.34	406.56	426.41
																																						8.14	-2.1875	0	-0.7813	-4.0625	-2.6563	29.688	120.78	255	351.41	399.38	426.25
																																						8.145	-0.4688	-4.0625	-3.125	-7.5	3.5938	28.75	117.19	254.53	358.59	393.28	416.88
																																						8.15	-1.25	-3.5938	0.4688	-2.1875	4.5313	27.188	118.13	249.53	352.19	398.75	417.81
																																						8.155	3.5938	-2.5	1.4063	-8.4375	0	33.125	116.09	254.06	352.66	398.75	416.88
																																						8.16	-2.1875	-0.4688	-1.875	-3.75	0.4688	32.344	120.47	250.63	350.94	389.84	423.13
																																						8.165	-0.625	-1.7188	0.1563	-2.6563	5.3125	29.375	115	257.5	351.88	399.84	425.47
																																						8.17	-3.75	-4.0625	-5.625	-7.5	-0.3125	30.469	116.56	256.72	351.25	403.13	420.94
																																						8.175	-1.0938	-0.1563	-0.625	-1.0938	1.25	32.344	117.5	259.69	345.31	402.03	420.47
																																						8.18	-4.0625	-1.25	-2.3438	-4.6875	1.0938	27.5	119.53	257.66	350	395	426.56
																																						8.185	-3.9063	-1.25	-1.0938	-2.6563	-1.0938	29.844	122.5	251.41	351.25	399.06	426.09
																																						8.19	-0.9375	-0.1563	-2.5	-4.8438	0.3125	32.188	117.81	250.47	351.56	395.31	413.91
																																						8.195	-0.625	-2.0313	-1.7188	-4.5313	1.5625	33.438	118.75	254.84	355.63	397.34	414.53
																																						8.2	-3.2813	-3.2813	-1.5625	-2.5	0.7813	31.406	117.03	252.19	349.69	396.72	417.19
																																						8.205	-0.3125	1.875	-3.9063	-3.125	-1.0938	30.625	119.84	253.13	345.31	404.69	408.28
																																						8.21	-2.8125	-2.8125	-3.2813	-6.7188	-1.5625	30.781	117.66	257.5	347.66	399.06	409.84
																																						8.215	-4.6875	-3.9063	-1.5625	-5	2.5	25.625	117.81	259.38	346.72	398.28	422.19
																																						8.22	-3.125	0.7813	-3.125	-3.9063	0.9375	26.719	119.84	250.63	347.03	403.13	409.38
																																						8.225	-3.9063	0.1563	-2.1875	-1.0938	-1.0938	29.219	119.22	247.5	349.84	401.56	406.72
																																						8.23	-0.7813	-1.0938	-0.3125	-4.8438	3.125	32.344	115.16	257.34	350.16	401.41	412.03
																																						8.235	2.6563	-0.1563	0	-3.9063	2.9688	26.875	115.78	254.06	344.84	395	406.88
																																						8.24	0.1563	-0.625	0.9375	-4.8438	-3.4375	34.219	110.94	253.28	345.16	404.38	412.66
																																						8.245	0.4688	0.625	-0.1563	-4.5313	4.2188	31.875	119.06	250.78	353.28	399.22	407.19
																																						8.25	-0.3125	-3.5938	-2.3438	-5.9375	2.9688	29.844	113.13	252.97	347.03	398.91	406.56
																																						8.255	-1.25	-0.9375	-3.9063	-3.9063	1.0938	28.594	111.88	251.09	349.06	402.5	407.19
																																						8.26	-0.9375	-2.0313	-3.5938	-7.0313	3.2813	35.313	112.66	257.81	357.34	395.31	412.19
																																						8.265	2.8125	-1.25	-2.9688	-4.2188	4.8438	29.688	117.5	251.88	351.88	396.72	416.88
																																						8.27	-5.3125	1.25	-0.7813	-4.5313	3.75	28.438	113.75	248.59	343.75	394.53	417.5
																																						8.275	0.4688	-4.375	-1.875	-3.9063	0.1563	31.25	112.81	249.38	345.16	387.19	416.88
																																						8.28	-0.9375	-2.3438	-4.5313	-3.125	0.625	32.344	107.97	252.66	342.97	395.31	424.06
																																						8.285	-0.4688	0.3125	-0.1563	-3.4375	1.0938	28.594	114.22	255.31	350.94	395.31	409.22
																																						8.29	-2.1875	-2.3438	-2.1875	-6.7188	0	29.688	114.84	249.53	356.09	400.31	413.59
																																						8.295	-1.5625	-1.25	-0.4688	-3.75	3.9063	30.781	118.59	245.16	357.03	388.75	405.47
																																						8.3	-1.25	-2.8125	-2.3438	-2.9688	3.2813	27.813	115.94	247.03	357.34	386.72	413.28
																																						8.305	-4.2188	-3.4375	-3.125	-2.8125	0.7813	30	117.81	247.5	349.69	389.53	416.72
																																						8.31	0	-3.9063	-4.5313	-5	2.6563	35.938	113.28	247.19	345.94	390.63	417.34
																																						8.315	0.1563	-1.4063	-0.7813	-3.4375	0.625	29.688	120.31	243.13	348.13	383.13	412.5
																																						8.32	-5.7813	-0.9375	-1.0938	-5.9375	3.75	27.656	118.59	244.38	341.41	386.09	408.59
																																						8.325	-2.1875	-3.9063	0.7813	-2.9688	2.8125	29.375	114.38	244.69	351.09	392.19	406.56
																																						8.33	-3.125	-1.25	0	-7.9688	3.75	31.719	118.75	246.09	344.84	386.56	400.47
																																						8.335	-0.625	-0.7813	-0.9375	-2.1875	0.9375	30.156	114.38	249.53	339.84	383.28	403.91
																																						8.34	0.7813	-2.3438	-4.0625	-6.0938	-2.5	30.469	117.34	247.5	342.66	382.34	405.31
																																						8.345	0.1563	-0.9375	-0.3125	-5.4688	2.3438	27.656	113.59	249.53	344.38	385.94	405.47
																																						8.35	-1.7188	0.9375	-1.0938	-4.2188	2.0313	29.688	110.78	246.09	344.22	378.13	399.53
																																						8.355	-3.4375	-1.25	0.9375	-2.8125	0.1563	28.906	112.81	244.53	343.75	381.88	395.63
																																						8.36	-6.25	-0.7813	-1.25	-4.2188	1.0938	25.938	118.44	251.72	340.16	382.19	401.72
																																						8.365	-2.0313	-1.5625	0.4688	-4.0625	3.75	28.906	120.78	254.22	346.72	381.25	403.13
																																						8.37	-7.1875	1.0938	-1.5625	-0.1563	2.0313	25.938	116.09	241.72	345.31	375.31	404.22
																																						8.375	0	-0.1563	1.5625	-2.3438	0	34.375	108.13	241.72	342.97	374.84	396.09
																																						8.38	-3.125	0	-1.0938	-2.6563	3.4375	29.375	104.22	245	339.38	385.94	401.41
																																						8.385	-1.25	-2.8125	-2.8125	-4.5313	0.7813	24.531	115.16	250.63	342.19	388.91	407.66
																																						8.39	-2.5	-2.1875	-3.4375	-6.875	0.3125	26.406	112.66	249.84	339.84	391.88	404.69
																																						8.395	-0.1563	0.1563	-1.875	-1.0938	2.9688	31.25	112.66	251.09	342.34	381.88	412.81
																																						8.4	-0.9375	-0.4688	-0.7813	-2.5	3.5938	26.094	112.81	250.16	337.34	388.75	406.72
																																						8.405	-0.1563	2.3438	-1.5625	-4.5313	2.1875	24.844	116.25	247.19	344.38	388.44	403.91
																																						8.41	-2.3438	-0.3125	0	-4.8438	2.1875	29.375	113.59	242.34	344.06	388.28	400.31
																																						8.415	-1.7188	-2.1875	3.75	-0.3125	0.4688	33.281	114.06	239.84	340.94	389.06	404.38
																																						8.42	-3.2813	2.0313	-0.9375	-5	3.5938	29.844	111.41	250.31	341.41	387.34	403.91
																																						8.425	-1.875	0.1563	1.5625	-4.0625	1.7188	27.969	112.34	244.69	342.03	383.75	400.94
																																						8.43	-2.1875	-2.5	-2.1875	-6.0938	3.9063	25.313	115.78	244.38	341.25	375.78	403.59
																																						8.435	-3.5938	-1.7188	-2.0313	-6.875	-2.1875	28.281	113.59	242.5	341.88	382.5	399.84
																																						8.44	-2.0313	-2.3438	-0.7813	-1.0938	-1.5625	29.688	113.13	243.91	342.19	381.88	405.31
																																						8.445	0.4688	-0.9375	-0.9375	-3.75	-0.4688	29.688	110.63	248.28	336.88	378.28	409.06
																																						8.45	-1.25	-1.0938	-2.0313	-1.0938	5.7813	25.938	112.34	248.75	341.72	381.56	399.84
																																						8.455	0.625	0	1.5625	-4.5313	0	22.344	108.91	249.38	339.53	379.38	399.53
																																						8.46	1.0938	-1.25	-3.125	-3.125	1.875	30.156	113.44	254.38	346.25	390.47	394.22
																																						8.465	-2.5	2.0313	-0.9375	-2.3438	2.6563	30.781	114.22	249.22	334.38	391.09	397.81
																																						8.47	-5	-1.4063	1.5625	-2.6563	1.0938	24.844	116.41	254.38	336.72	387.5	396.09
																																						8.475	2.1875	-1.25	-0.1563	-4.6875	-0.7813	31.094	115.78	238.28	340.78	377.81	397.5
																																						8.48	-0.4688	0.1563	-2.1875	-5.4688	1.5625	29.219	110.63	247.19	339.22	379.84	392.97
																																						8.485	-1.25	0.7813	-0.1563	-2.0313	3.4375	29.219	113.75	244.84	342.81	377.03	397.97
																																						8.49	-2.5	-2.3438	0.3125	-1.7188	-2.1875	35.313	111.88	238.75	348.59	377.03	397.97
																																						8.495	1.5625	-0.3125	-3.125	-5.9375	5.3125	33.594	114.53	237.97	345.63	375.78	398.59
																																						8.5	-1.5625	-2.1875	-1.7188	0.9375	0.3125	28.438	109.22	240.78	335.16	378.91	394.22
																																						8.505	-1.0938	-0.625	-2.9688	-1.25	3.5938	29.531	107.81	243.28	341.72	378.13	394.38
																																						8.51	0.7813	-2.6563	-3.125	-2.5	1.4063	32.031	111.25	239.53	333.28	382.34	389.53
																																						8.515	-2.6563	-2.9688	-5.1563	0.4688	3.4375	27.813	114.38	239.22	331.25	375.31	391.41
																																						8.52	-4.6875	-2.3438	-4.0625	-2.9688	3.125	29.688	108.91	244.84	334.38	377.81	395.94
																																						8.525	0.1563	-0.3125	-6.4063	-4.6875	0.3125	30.938	110	238.91	334.53	377.81	395.31
																																						8.53	1.5625	-1.5625	-1.25	-0.4688	6.4063	30.938	109.84	246.09	335.94	379.53	398.13
																																						8.535	-0.4688	0.4688	-2.0313	-1.0938	3.75	32.969	111.72	246.88	334.06	383.13	391.09
																																						8.54	2.9688	-3.9063	1.5625	-2.5	-0.9375	30.313	107.34	247.66	331.09	378.75	395.31
																																						8.545	4.2188	-3.4375	-0.4688	-1.7188	3.5938	30.156	108.28	243.28	337.81	377.81	399.69
																																						8.55	1.5625	-4.0625	-3.75	-6.4063	5.3125	29.063	111.56	243.44	330	380.94	397.5
																																						8.555	-4.2188	-1.25	0.4688	-3.125	4.375	27.344	111.88	241.41	331.56	381.25	395
																																						8.56	-2.0313	-0.625	-3.4375	-2.0313	1.25	29.063	108.28	249.06	322.81	378.44	396.72
																																						8.565	-4.5313	2.6563	-2.0313	-1.5625	4.2188	29.063	107.19	249.38	331.09	379.38	395.16
																																						8.57	-6.5625	-2.8125	-2.6563	-5.4688	1.0938	27.031	108.28	242.19	328.28	379.84	395.63
																																						8.575	-5	-1.25	0.4688	-3.2813	1.4063	29.688	116.72	238.28	338.59	378.91	399.06
																																						8.58	-1.875	0.1563	0.1563	-2.5	3.4375	30.469	110.63	242.97	327.03	370.16	395.47
																																						8.585	0.3125	-0.3125	-1.5625	-1.7188	0.9375	28.281	116.09	240.63	334.06	371.25	397.5
																																						8.59	0	2.0313	-0.3125	-3.9063	0.9375	24.844	115	238.28	333.44	374.06	393.44
																																						8.595	3.4375	0.7813	-3.4375	-7.5	3.5938	31.25	113.75	240.78	327.66	371.09	397.34
																																						8.6	-2.0313	-0.625	-1.25	-1.4063	1.0938	33.125	107.81	234.69	329.84	365.78	394.69
																																						8.605	-2.9688	0.625	-1.875	-2.9688	1.875	31.094	109.84	239.53	333.28	363.91	390.16
																																						8.61	-3.9063	-2.0313	-1.25	-0.9375	0.4688	31.406	112.34	241.25	316.88	366.41	392.19
																																						8.615	-2.6563	-0.1563	-2.1875	-3.4375	4.5313	32.969	104.06	244.38	324.84	369.84	397.5
																																						8.62	-2.5	-2.8125	-1.25	-2.0313	0	32.344	113.28	242.03	323.13	369.69	392.34
																																						8.625	-3.4375	-0.7813	-0.3125	-3.2813	-1.0938	28.125	111.72	242.81	330	371.72	393.13
																																						8.63	-1.25	-1.25	0.625	-1.875	1.5625	27.031	106.41	240	332.5	365.31	393.59
																																						8.635	-3.2813	-1.875	0.7813	-0.1563	2.6563	25.781	109.53	242.97	337.03	371.09	388.44
																																						8.64	-5	-0.9375	-2.3438	-3.125	0.9375	33.281	108.44	242.97	337.5	367.19	392.81
																																						8.645	1.7188	1.4063	-0.7813	-0.1563	1.0938	27.656	113.44	237.03	341.09	368.28	395.31
																																						8.65	-2.8125	1.0938	-1.25	-1.7188	4.2188	31.875	113.28	241.72	339.06	376.88	391.56
																																						8.655	-1.25	-0.625	-2.5	-4.8438	3.125	31.875	115.16	246.25	332.19	378.75	386.72
																																						8.66	-2.6563	-0.3125	-4.0625	-5	4.8438	30.313	110.94	240.47	335.16	373.28	384.69
																																						8.665	-1.0938	-1.0938	-0.3125	-2.9688	2.3438	26.563	110.31	239.84	334.84	374.84	387.19
																																						8.67	-1.25	-2.0313	-0.7813	-1.5625	2.9688	29.688	106.09	235	331.88	370	389.38
																																						8.675	-1.4063	0.3125	1.25	-1.0938	1.0938	29.688	106.72	233.91	332.81	371.25	389.38
																																						8.68	-2.5	1.7188	0.9375	-0.625	6.4063	29.375	114.06	232.34	330.78	373.13	390.16
																																						8.685	-0.4688	-0.1563	-0.625	-1.7188	-0.9375	26.094	116.09	235.94	332.34	381.56	380.16
																																						8.69	-0.9375	0.1563	-1.0938	-2.8125	-0.1563	27.344	108.13	236.41	329.69	375.63	382.97
																																						8.695	-0.625	-0.7813	2.1875	-2.6563	2.0313	27.656	110.78	237.97	337.03	378.59	391.09
																																						8.7	-0.9375	-0.625	-2.9688	-0.9375	-0.1563	25.625	108.59	237.03	332.81	368.91	387.19
																																						8.705	0.1563	1.0938	-3.125	-0.9375	-2.1875	27.188	112.81	242.34	327.66	370	385.94
																																						8.71	-0.625	-0.7813	-2.5	0.625	-1.4063	27.656	111.72	246.88	325.63	367.03	391.72
																																						8.715	-2.6563	-0.625	-3.5938	-5	4.6875	28.281	110	240.63	329.53	371.25	388.28
																																						8.72	-6.875	-3.75	-0.4688	-1.875	1.7188	27.656	109.53	237.34	327.19	375.78	379.69
																																						8.725	0.4688	2.1875	-1.25	-1.5625	-0.9375	27.969	111.56	231.88	329.38	379.69	379.38
																																						8.73	0	-0.1563	-0.3125	-3.4375	-2.5	24.844	109.22	239.69	327.5	372.34	390.78
																																						8.735	0.3125	0	-0.3125	-0.7813	1.5625	30	113.75	229.38	330.31	371.09	377.97
																																						8.74	-2.3438	-0.625	0.1563	-3.2813	-3.2813	27.969	109.69	234.06	324.84	371.56	391.09
																																						8.745	0.9375	0.7813	2.3438	-5.4688	1.875	27.031	108.13	239.84	319.53	365.78	390.47
																																						8.75	-2.1875	-0.625	0.1563	-1.875	4.2188	30.625	108.75	242.5	325.16	365.63	389.53
																																						8.755	-4.375	-2.1875	0.625	1.5625	2.6563	30.625	109.06	234.38	326.56	368.91	393.13
																																						8.76	-4.6875	0.4688	-3.5938	-1.25	2.0313	26.563	107.66	234.06	330.31	367.81	392.5
																																						8.765	-2.3438	-0.7813	-0.625	-0.3125	2.9688	29.688	111.56	233.59	326.09	375.47	381.41
																																						8.77	-4.8438	1.0938	0	-4.375	3.9063	22.969	114.53	231.56	329.06	369.53	392.81
																																						8.775	-0.625	-1.7188	0.7813	-4.0625	0.9375	26.094	114.38	232.97	324.53	367.97	376.88
																																						8.78	-2.9688	-1.0938	-1.5625	-0.625	2.3438	26.719	113.91	232.81	331.41	368.28	373.44
																																						8.785	-1.7188	-1.5625	-2.6563	0.1563	3.9063	27.813	119.69	234.84	329.38	378.59	384.06
																																						8.79	-6.25	-3.9063	-2.5	-4.0625	1.7188	28.125	115.94	241.09	324.84	374.69	384.38
																																						8.795	-3.4375	0	0	-2.5	4.5313	31.25	116.56	238.75	329.06	366.88	381.25
																																						8.8	-5.3125	0.9375	2.3438	-0.9375	5.1563	28.438	113.75	235.16	326.72	375.47	386.72
																																						8.805	-1.25	0.625	-0.4688	-4.375	0.625	33.281	117.66	237.81	318.75	371.09	389.38
																																						8.81	0	-0.4688	-0.3125	-2.1875	1.25	25.625	108.59	237.03	317.66	371.56	386.56
																																						8.815	-2.5	1.7188	-2.9688	-0.625	4.0625	25.313	108.59	234.22	313.44	368.91	382.03
																																						8.82	-4.8438	-1.25	-0.3125	-2.5	0	26.563	102.97	231.56	322.81	372.03	382.34
																																						8.825	-4.8438	0.4688	-0.3125	-3.125	3.75	30.313	106.41	228.44	315.47	366.72	382.97
																																						8.83	-2.0313	-1.25	-2.0313	-1.7188	2.0313	27.188	109.84	237.34	316.25	363.28	382.66
																																						8.835	-0.1563	-4.2188	-1.875	-5	-1.0938	30.156	106.88	232.97	318.59	359.84	383.59
																																						8.84	-0.1563	-2.0313	0.9375	-1.7188	-1.25	31.094	111.09	235.94	323.44	362.97	382.97
																																						8.845	-1.25	-4.2188	-2.5	-1.0938	3.125	32.344	107.19	228.44	322.81	357.66	385.16
																																						8.85	-1.0938	-3.75	-0.625	2.9688	1.4063	31.094	111.09	234.53	323.44	368.28	376.41
																																						8.855	0.3125	-4.5313	-1.0938	-5.625	4.5313	32.813	113.28	238.59	319.38	367.81	386.41
																																						8.86	2.0313	-0.7813	-1.25	-3.9063	2.3438	32.188	113.13	236.09	329.69	364.38	385
																																						8.865	-3.4375	-0.9375	0.4688	-3.4375	4.6875	33.125	118.91	231.41	332.97	358.75	385.31
																																						8.87	-4.2188	-0.9375	-1.5625	-5	1.7188	30.938	113.44	232.81	336.56	363.91	384.84
																																						8.875	0	1.7188	-0.9375	-1.4063	3.75	29.219	110.47	234.38	321.41	362.97	382.34
																																						8.88	-0.4688	0.4688	-3.9063	-0.1563	0.1563	27.813	111.41	237.03	316.72	361.72	381.25
																																						8.885	-2.5	-3.4375	-0.9375	-4.2188	1.0938	31.563	111.72	234.06	310.47	361.56	386.41
																																						8.89	-2.0313	-2.9688	-2.1875	-0.625	-2.0313	23.594	104.84	233.75	308.28	366.25	384.84
																																						8.895	-0.4688	-0.7813	-2.3438	1.7188	-2.3438	22.031	106.56	233.44	314.84	357.81	376.09
																																						8.9	0.625	0.7813	0.3125	-0.4688	-1.0938	28.125	104.22	232.34	315.16	356.56	386.09
																																						8.905	0	1.0938	0.1563	-2.8125	-1.5625	26.406	111.09	237.66	319.22	370.78	386.88
																																						8.91	2.3438	-2.5	-2.1875	-3.2813	2.1875	23.594	109.22	240.63	321.25	363.91	380.78
																																						8.915	-0.9375	-1.25	-3.4375	-3.125	4.5313	29.063	110	232.03	317.5	367.5	377.66
																																						8.92	-2.6563	1.4063	-2.1875	-2.9688	0.9375	27.188	110.94	228.75	323.28	375.31	374.22
																																						8.925	-2.3438	-1.25	-3.125	-1.875	3.2813	30.938	111.72	233.91	322.19	367.03	390.31
																																						8.93	-3.125	-1.0938	-2.5	-2.1875	2.5	33.906	107.66	236.88	312.81	370.94	384.84
																																						8.935	-0.7813	-2.9688	-1.25	-2.3438	1.0938	35.313	101.09	233.91	312.97	363.13	393.13
																																						8.94	-3.2813	-0.625	0.9375	-2.3438	-0.1563	34.844	104.38	230.63	309.22	362.03	385.31
																																						8.945	0.4688	-0.9375	-2.8125	-3.9063	-0.3125	27.031	110.78	230.78	311.72	364.84	379.22
																																						8.95	-2.1875	1.875	-1.25	-1.0938	-1.5625	31.094	107.66	224.38	311.09	363.28	387.66
																																						8.955	-2.8125	-1.0938	-5	-2.8125	-1.4063	32.188	110.16	231.72	319.53	362.97	378.91
																																						8.96	-1.25	-1.25	-5.625	-3.75	0	29.531	104.84	230.94	314.38	361.09	378.44
																																						8.965	-3.5938	-3.4375	-2.3438	-3.9063	1.0938	31.719	101.88	228.91	317.03	354.84	380.63
																																						8.97	-3.75	-4.0625	0.9375	-3.125	1.4063	32.969	105.63	226.56	312.97	350.47	378.28
																																						8.975	0.625	-2.5	0	-4.8438	1.875	30.156	103.91	229.84	313.75	342.66	372.19
																																						8.98	-1.5625	-0.625	0	-2.1875	7.8125	28.281	109.84	227.5	312.5	353.13	380.47
																																						8.985	-1.25	-2.0313	-1.25	-5.625	1.25	30.938	105.94	228.59	316.41	353.91	374.53
																																						8.99	-4.0625	-2.1875	0.9375	-4.2188	-0.1563	34.375	104.06	235.94	318.13	355.31	373.28
																																						8.995	-4.375	1.875	-0.625	-2.9688	2.1875	30.781	106.25	230.94	323.59	352.81	378.59
[truncated: 108 more columns]
